# Supplementary material
Source: Research Square preprint supplement (doi:10.21203/rs.3.rs-10123477/v1)
Supplement: Supplementary file 1 [file c9ae5bf45031c0b2f6042555.docx]

**Supplemental Information**

**Topology-Driven Photoenhanced Gold Recovery in Three-Dimensional Covalent Organic Frameworks**

Yunyu Guo1,4, Yuan-Zhe Cheng2,4, Jiaqi Guo1,4, Jiahuan Wang1, Aowei Lv1, Jingyang Lin1, Jiaqi Ma1, Shuai Fu3,*, Mischa Bonn3, Xuesong Ding2,* & Enquan Jin1,*

1State Key Laboratory of Inorganic Synthesis and Preparative Chemistry, College of Chemistry and International Center of Future Science, Jilin University, Changchun 130012, China.

2National Center for Nanoscience and Technology, Beijing 100190, China.

3Max Planck Institute for Polymer Research, Mainz 55128, Germany.

4These authors contributed equally to this work.

*E-mail: [fu01@mpip-mainz.mpg.de](mailto:fu01@mpip-mainz.mpg.de); [dingxs@nanoctr.cn](mailto:dingxs@nanoctr.cn); c[enquanjin@jlu.edu.cn](mailto:enquanjin@jlu.edu.cn)

Contents

[**1. Supplementary Methods S3**](#_Toc232772290)

[**2. Supplementary Figures S4**](#_Toc232772291)

[**3. Supplementary Tables S24**](#_Toc232772292)

[**4. Supplementary References S32**](#_Toc232772293)

1. Supplementary Methods

**Theoretical calculation methods**

All molecular structures were built and optimized using Discovery Studio 2024. The GAFF2 force field parameters for each molecule were generated using the Sobtop program. Molecular dynamics (MD) simulations were performed with GROMACS 2021 package, employing the GAFF2 force field throughout. Each system was solvated in a cubic box with TIP3P water molecules, and Na⁺/Cl⁻ counterions were added to neutralize the total charge of the system.

The initial conformations were first subjected to energy minimization for eliminating unfavorable steric contacts prior to production runs. Subsequently, a 100 ps NVT (constant number of particles, volume, and temperature) equilibration was performed for gradually heating the system towards the target temperature. The system was further equilibrated for 100 ps under NPT conditions (constant number of particles, pressure, and temperature) to allow the density to reach the equilibrium value at the target pressure. After the system was fully relaxed through the equilibration procedures, production molecular dynamics simulations were carried out. The equations of motion were integrated using the leap-frog algorithm with a time step of 1.0 fs (0.001 ps). A total of 100,000,000 integration steps were executed, corresponding to an overall simulation time of 100.0 ns.

Long-range electrostatic interactions were treated with the particle mesh Ewald (PME) method, while long-range van der Waals interactions were corrected using dispersion correction, owing to the use of a cut-off distance. Periodic boundary conditions were applied in all three dimensions. All trajectory analyses were processed with GROMACS built-in tools. Molecular conformations were visualized with PyMOL (<http://www.pymol.org/>), and all plots were generated using the Matplotlib library in Python.

2. Supplementary Figures


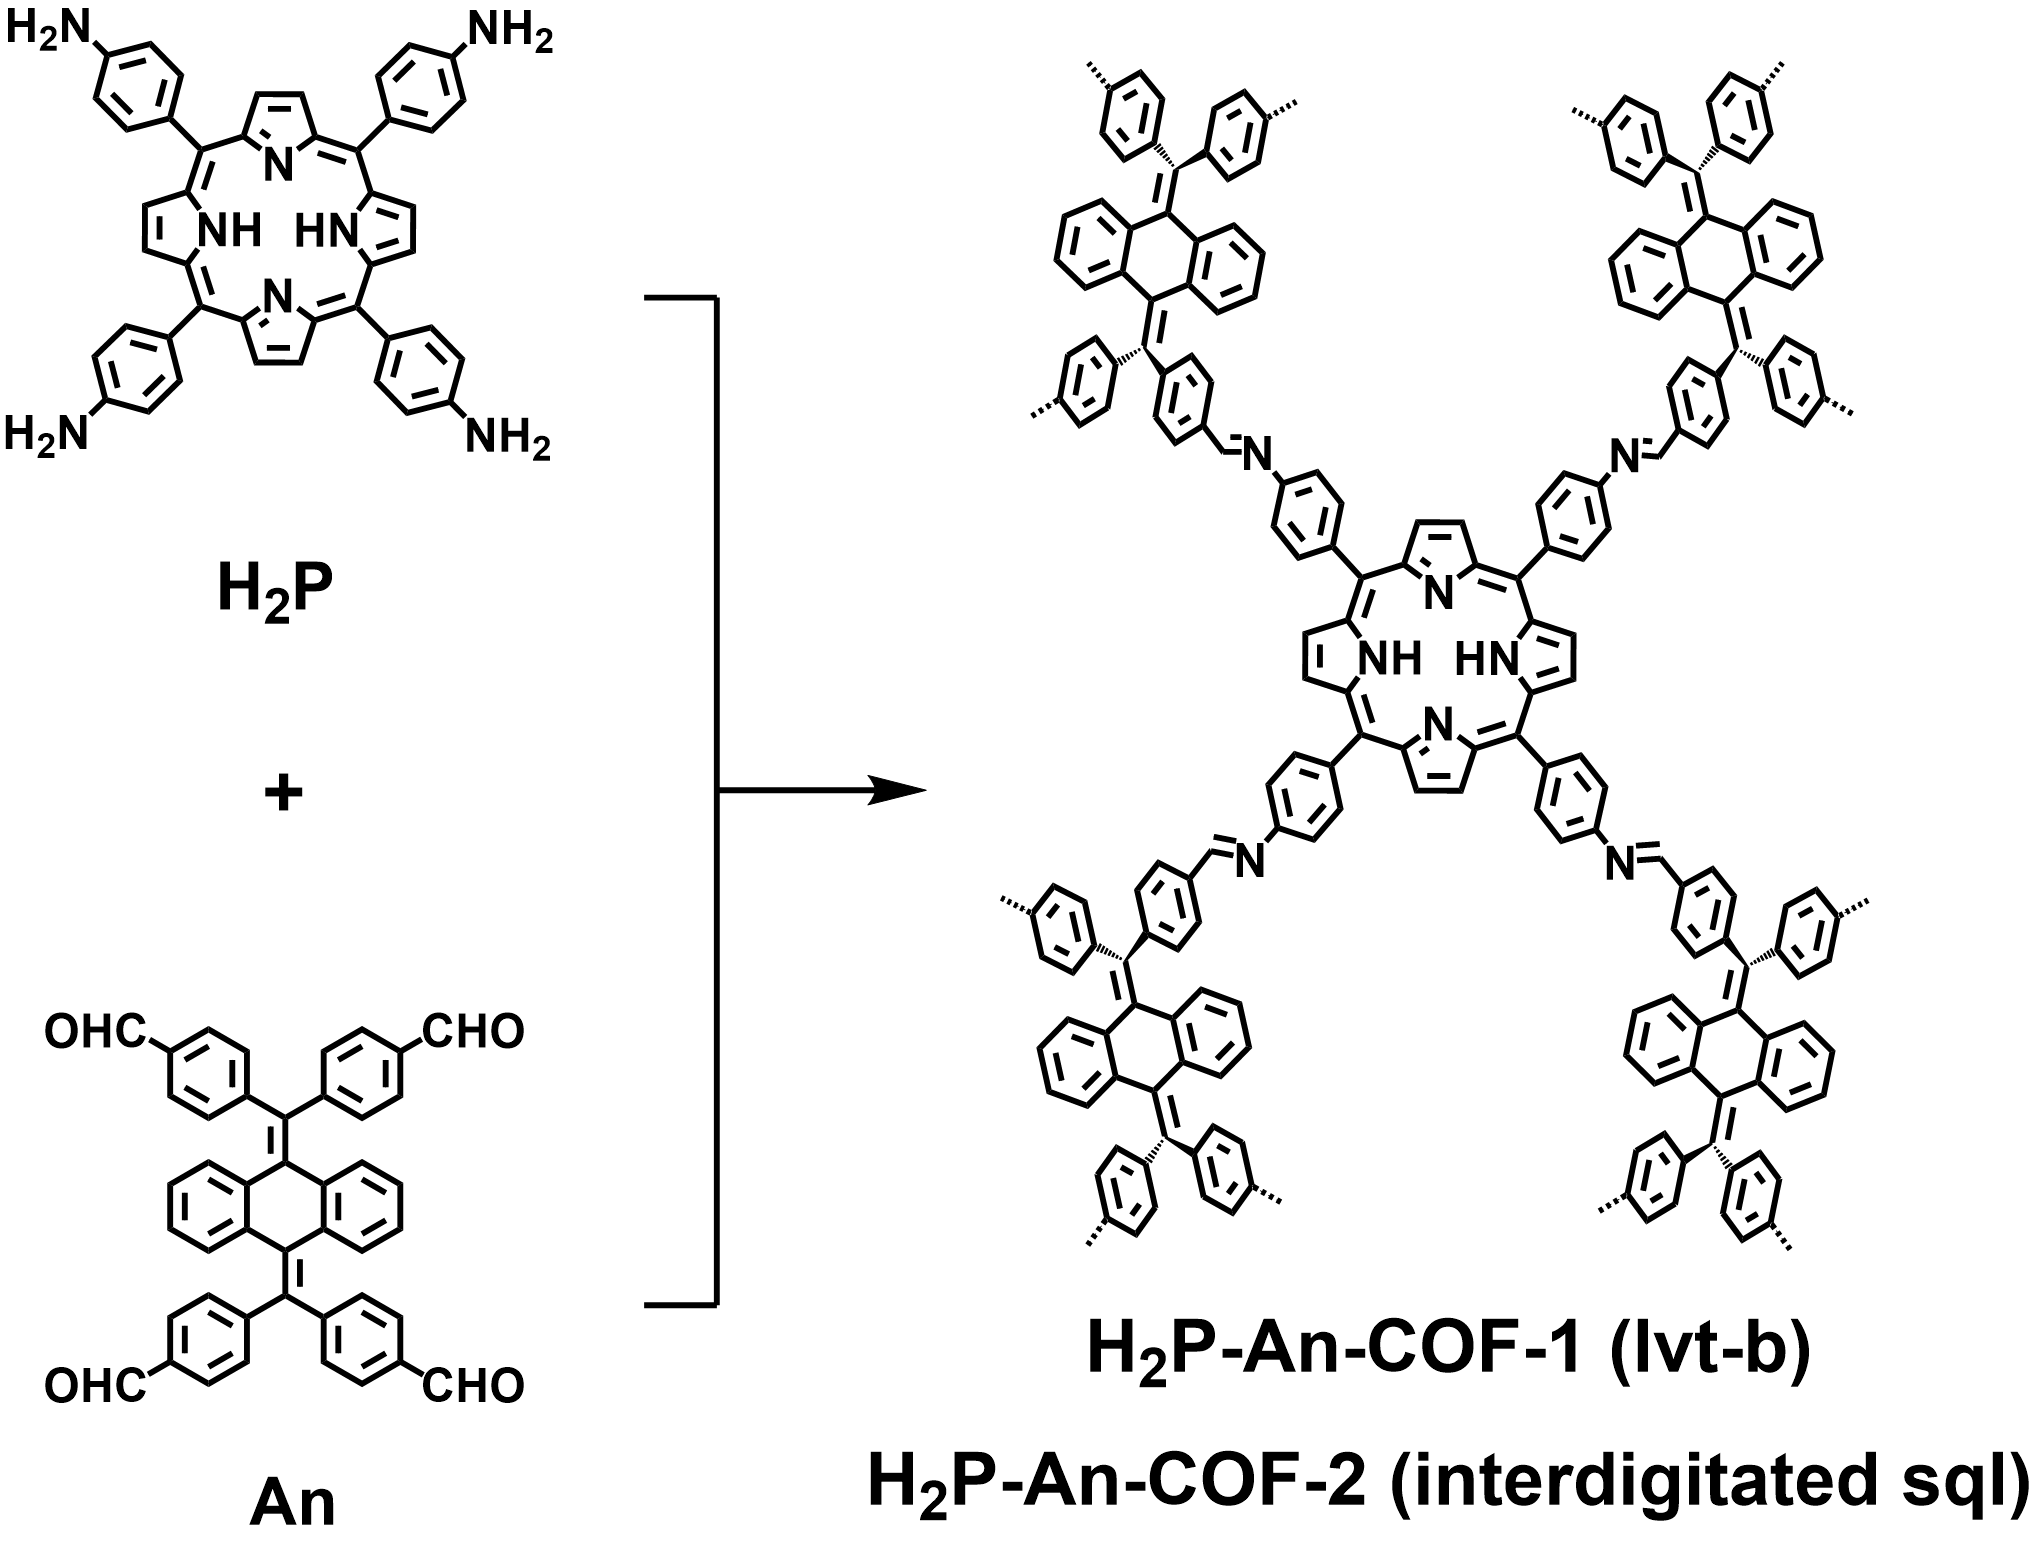


**Supplementary Fig. 1** Synthetic route towards H2P-An-COF-1 and H2P-An-COF-2.





**Supplementary Fig. 2** PXRD pattern of H2P-An-COF-1.


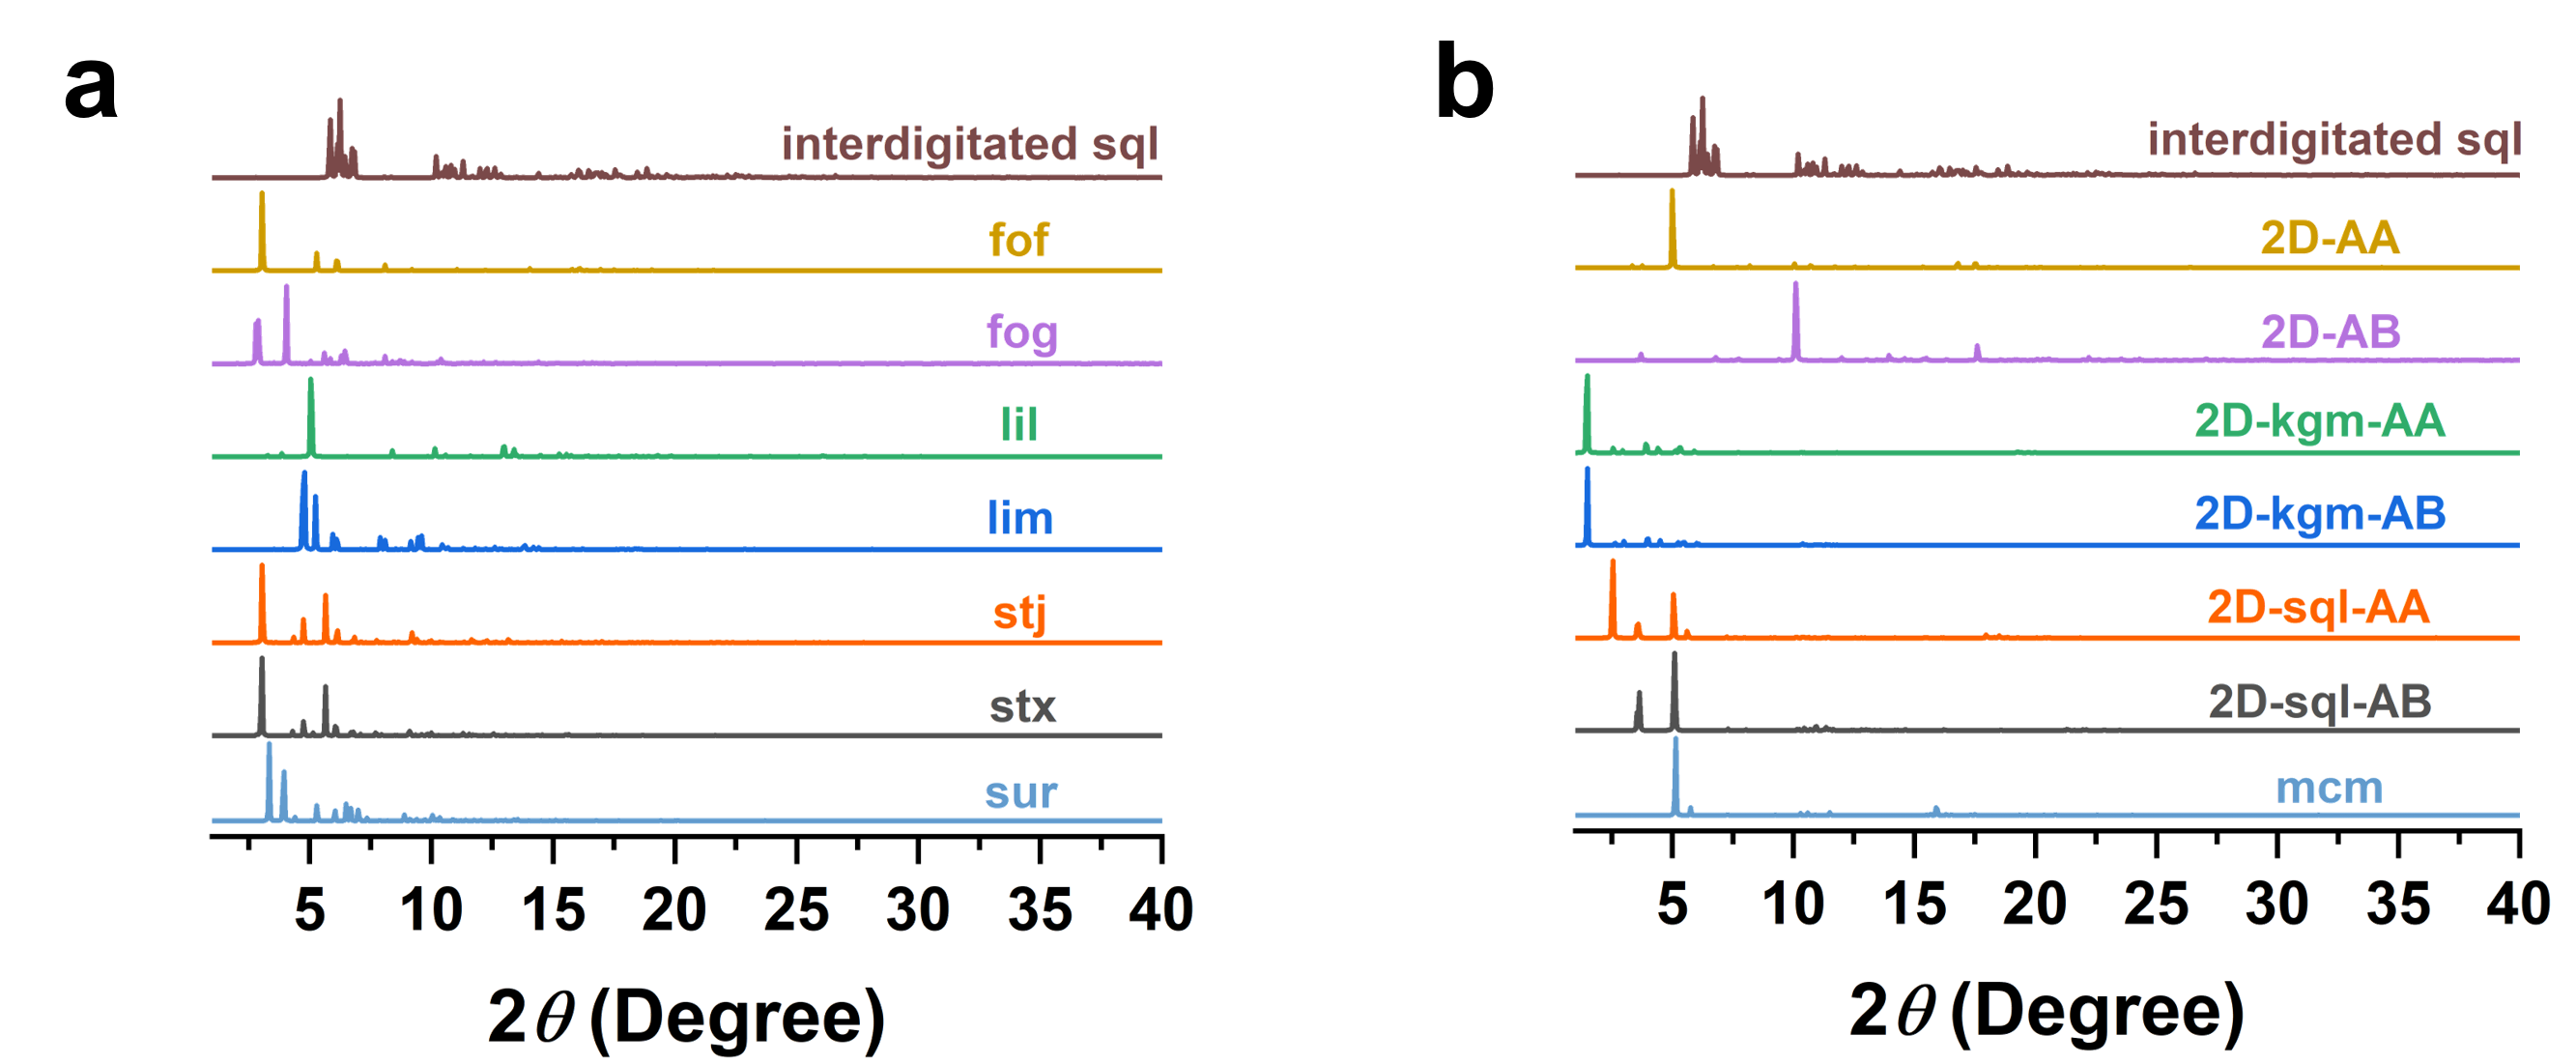


**Supplementary Fig. 3** Simulated PXRD of possible H2P-An-COF-2 structures.


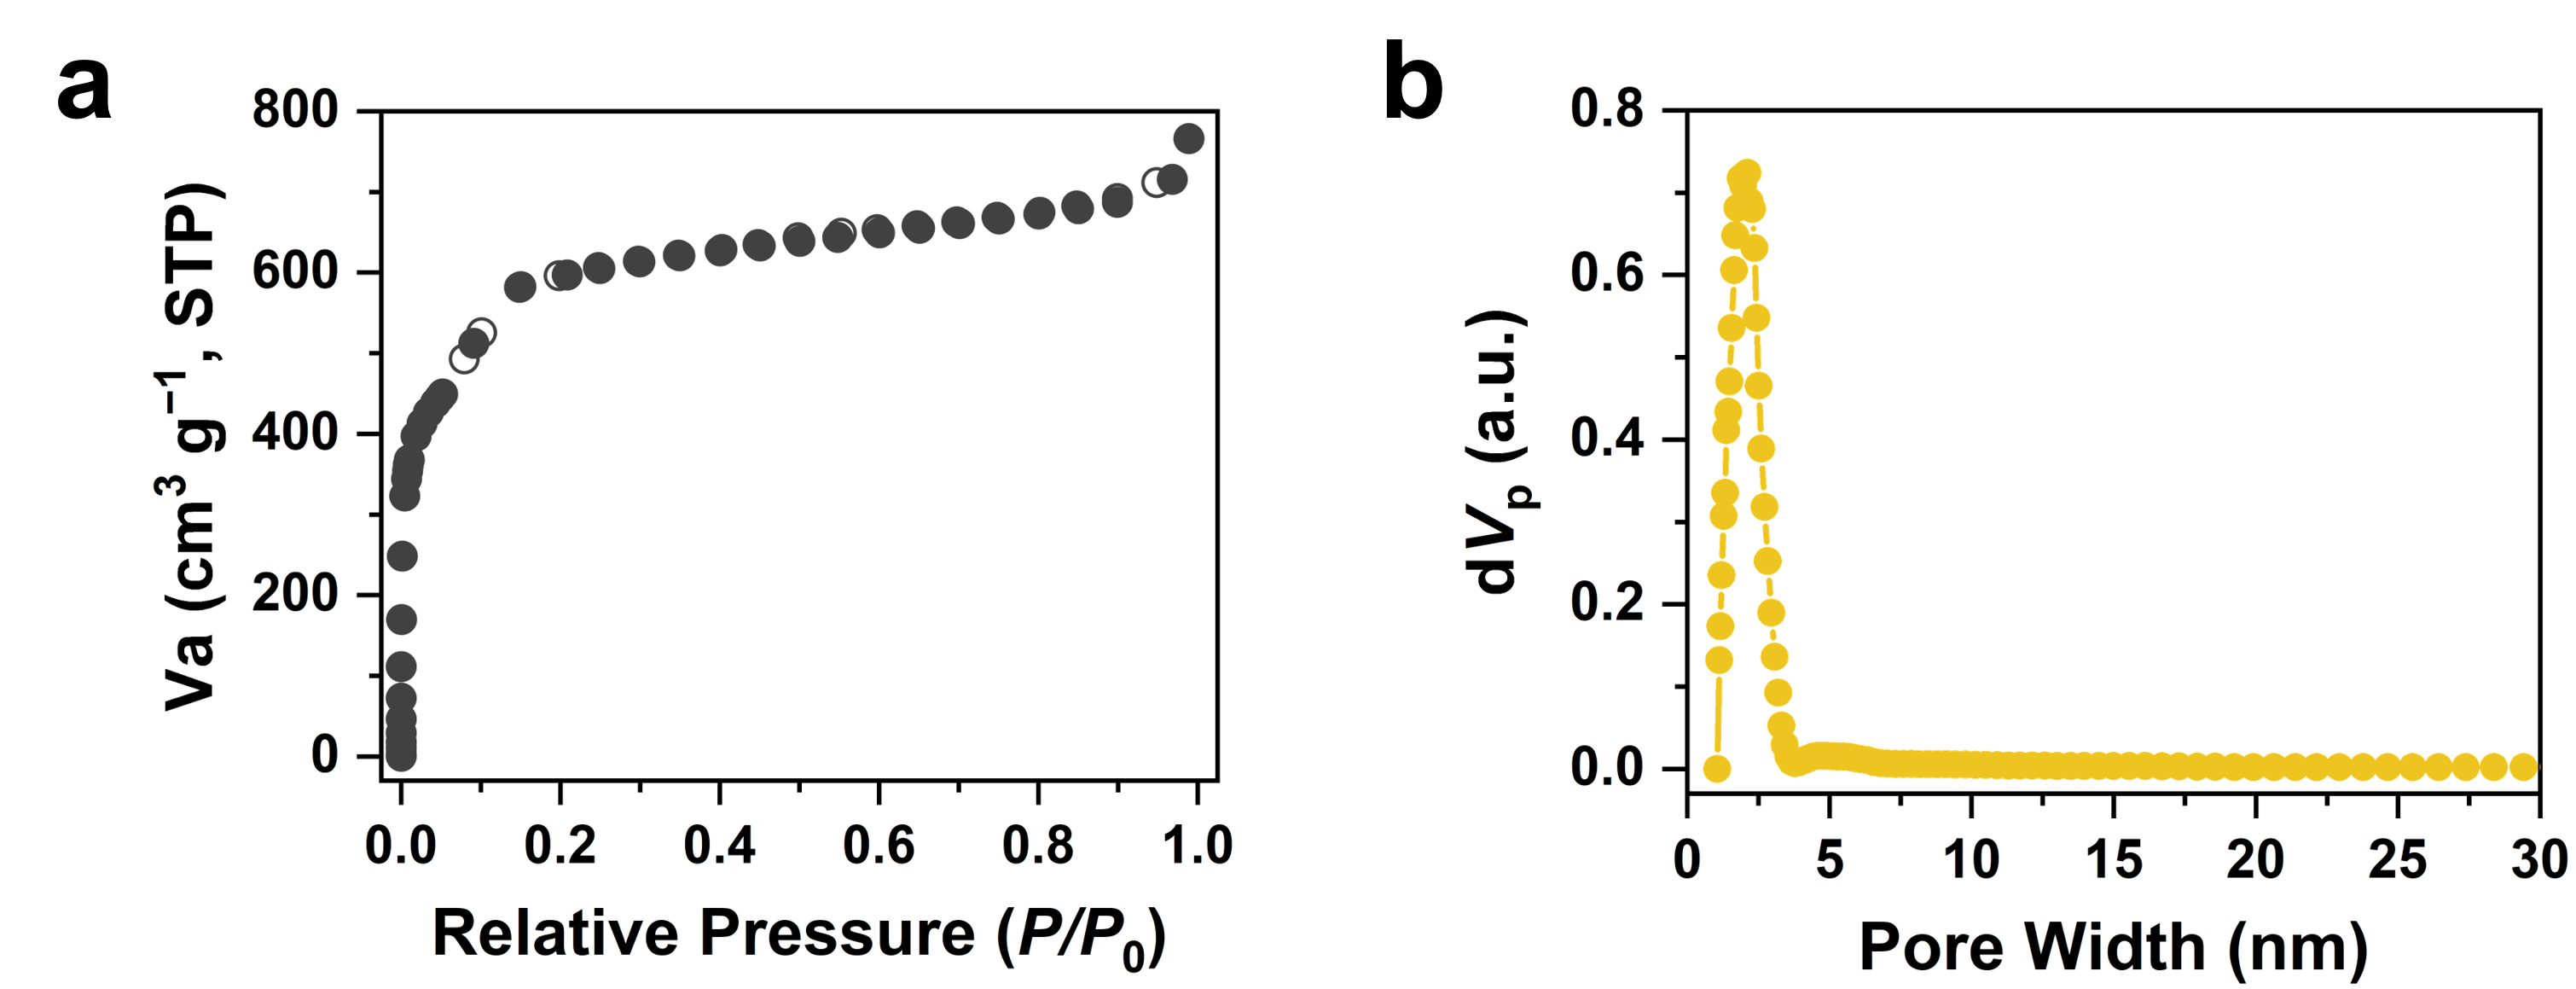


**Supplementary Fig. 4** (a) Nitrogen sorption isotherm curve of H2P-An-COF-1 (solid dots for adsorption and open circles for desorption) and (b) pore size distribution profiles of H2P-An-COF-1.


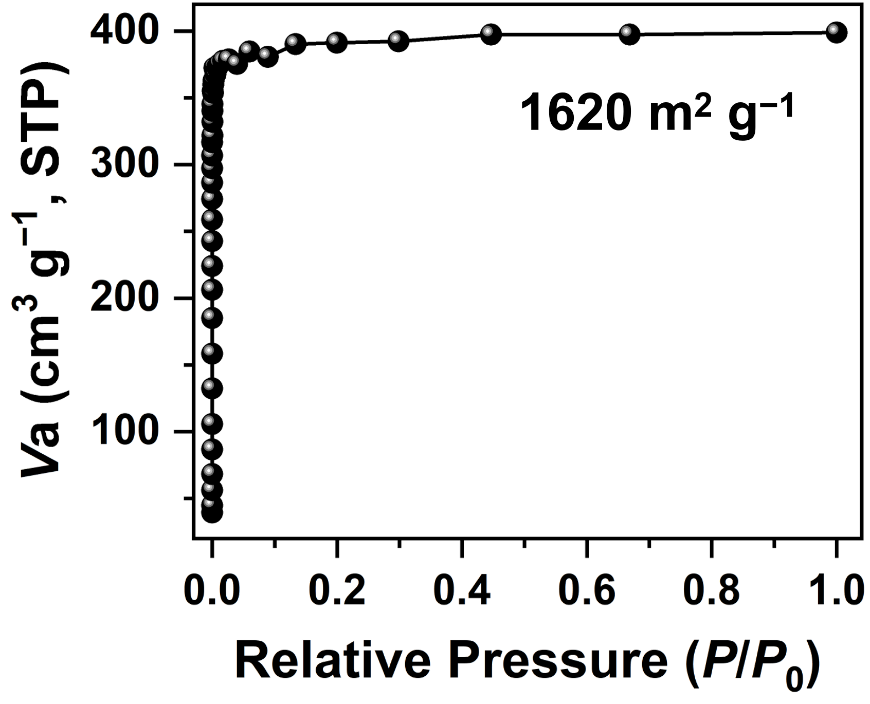


**Supplementary Fig. 5** Theoretical nitrogen sorption isotherms of H2P-An-COF-2.


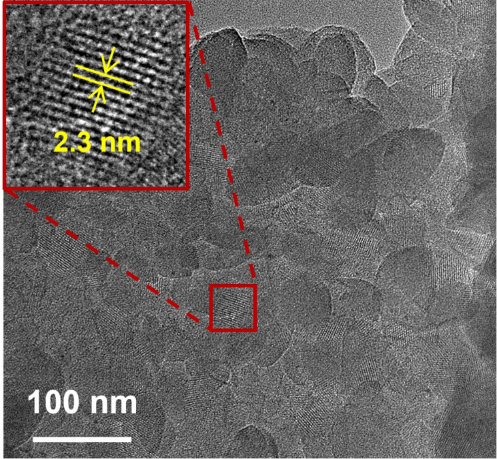


**Supplementary Fig. 6** HR-TEM image of H2P-An-COF-1 with a pore size of 2.3 nm.





**Supplementary Fig. 7** FT-IR spectra of H2P-An-COF-1, An, and H2P.


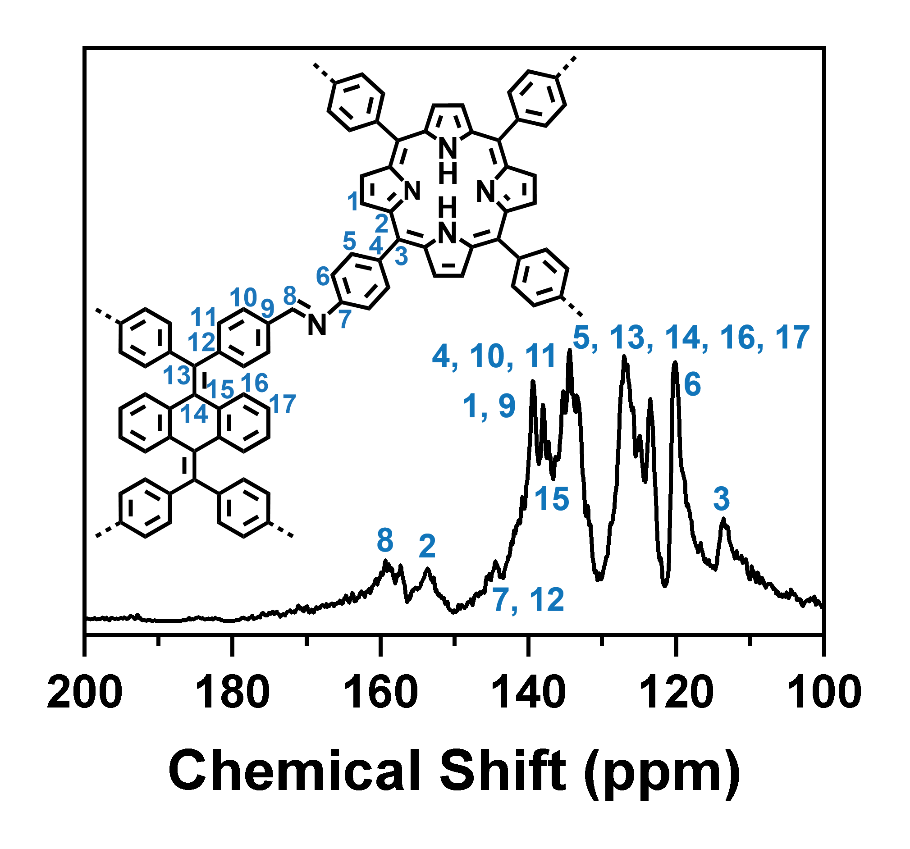


**Supplementary Fig. 8** Solid-state 13C NMR spectrum of H2P-An-COF-1.


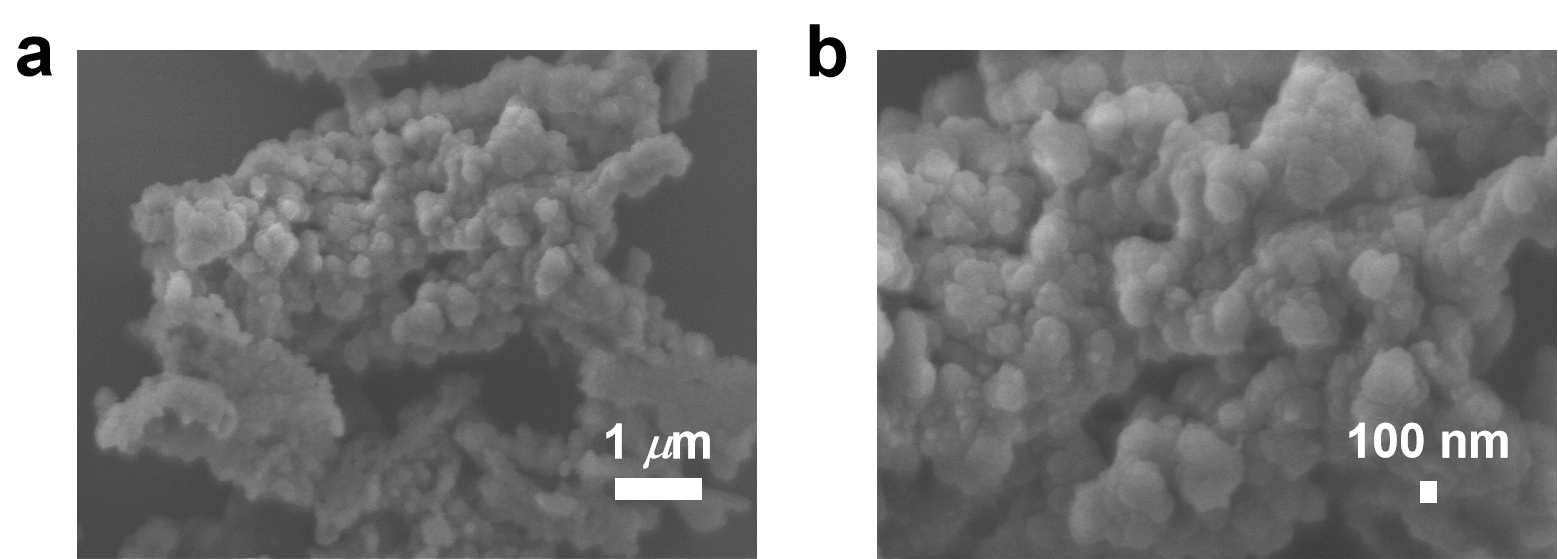


**Supplementary Fig. 9** FE-SEM images of H2P-An-COF-1.


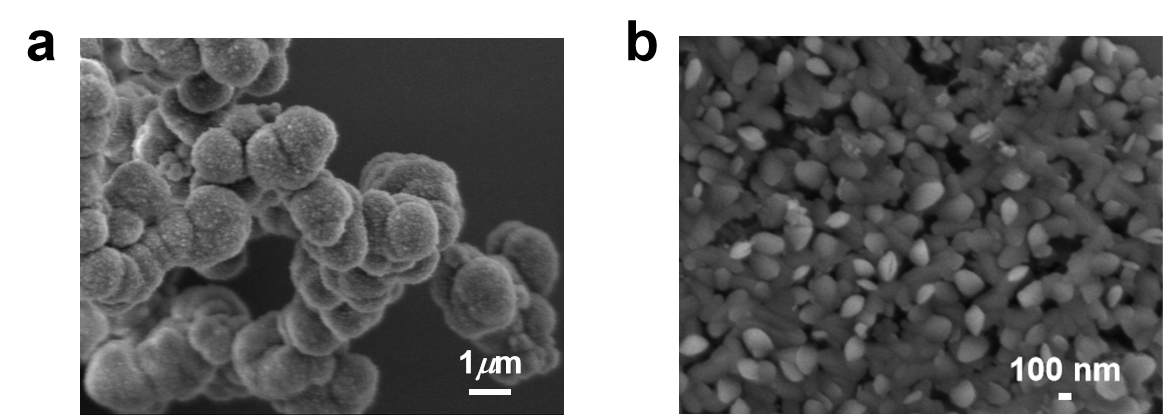


**Supplementary Fig. 10** FE-SEM images of H2P-An-COF-2.


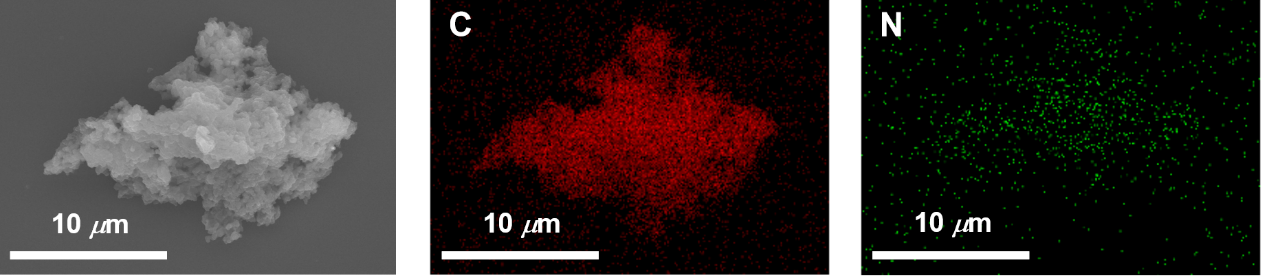


**Supplementary Fig. 11** EDS images of H2P-An-COF-1.


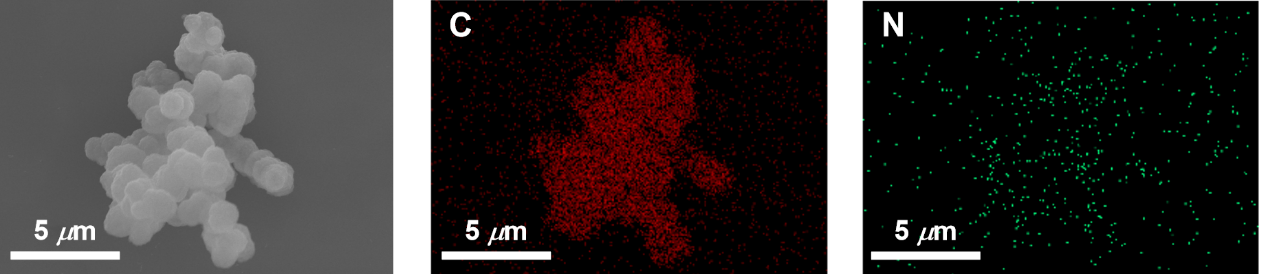


**Supplementary Fig. 12** EDS images of H2P-An-COF-2.





**Supplementary Fig. 13** TGA curve of H2P-An-COF-1.





**Supplementary Fig. 14** TGA curve of H2P-An-COF-2.


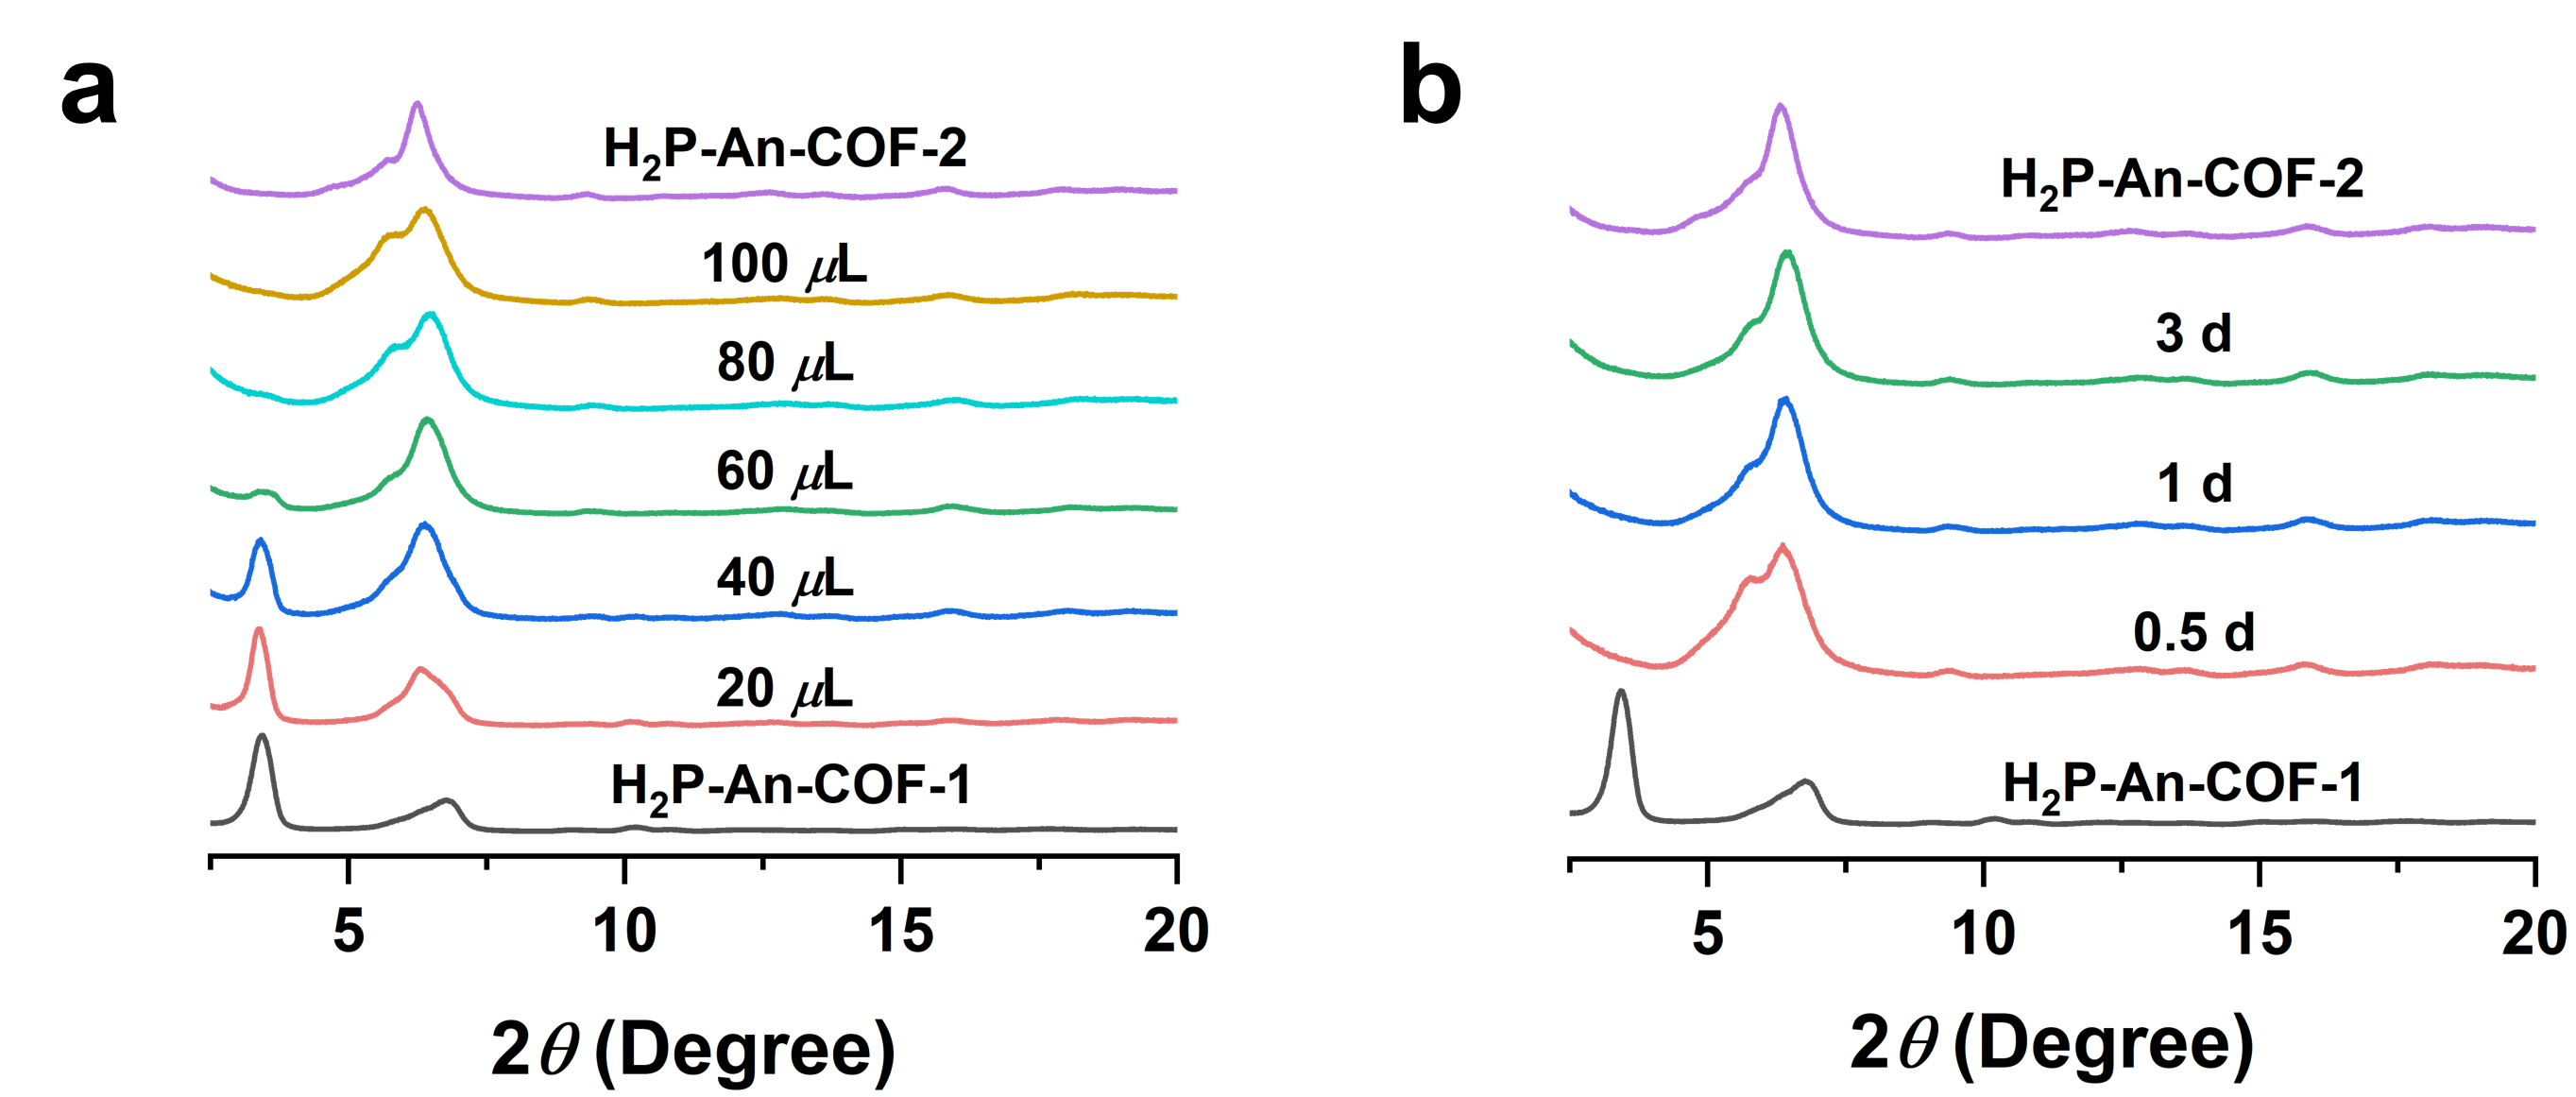


**Supplementary Fig. 15** PXRD patterns of the transformation from H2P-An-COF-1 to H2P-An-COF-2 (a) within five days using varying amounts of aniline and (b) within different time using 100 *m*L of aniline.


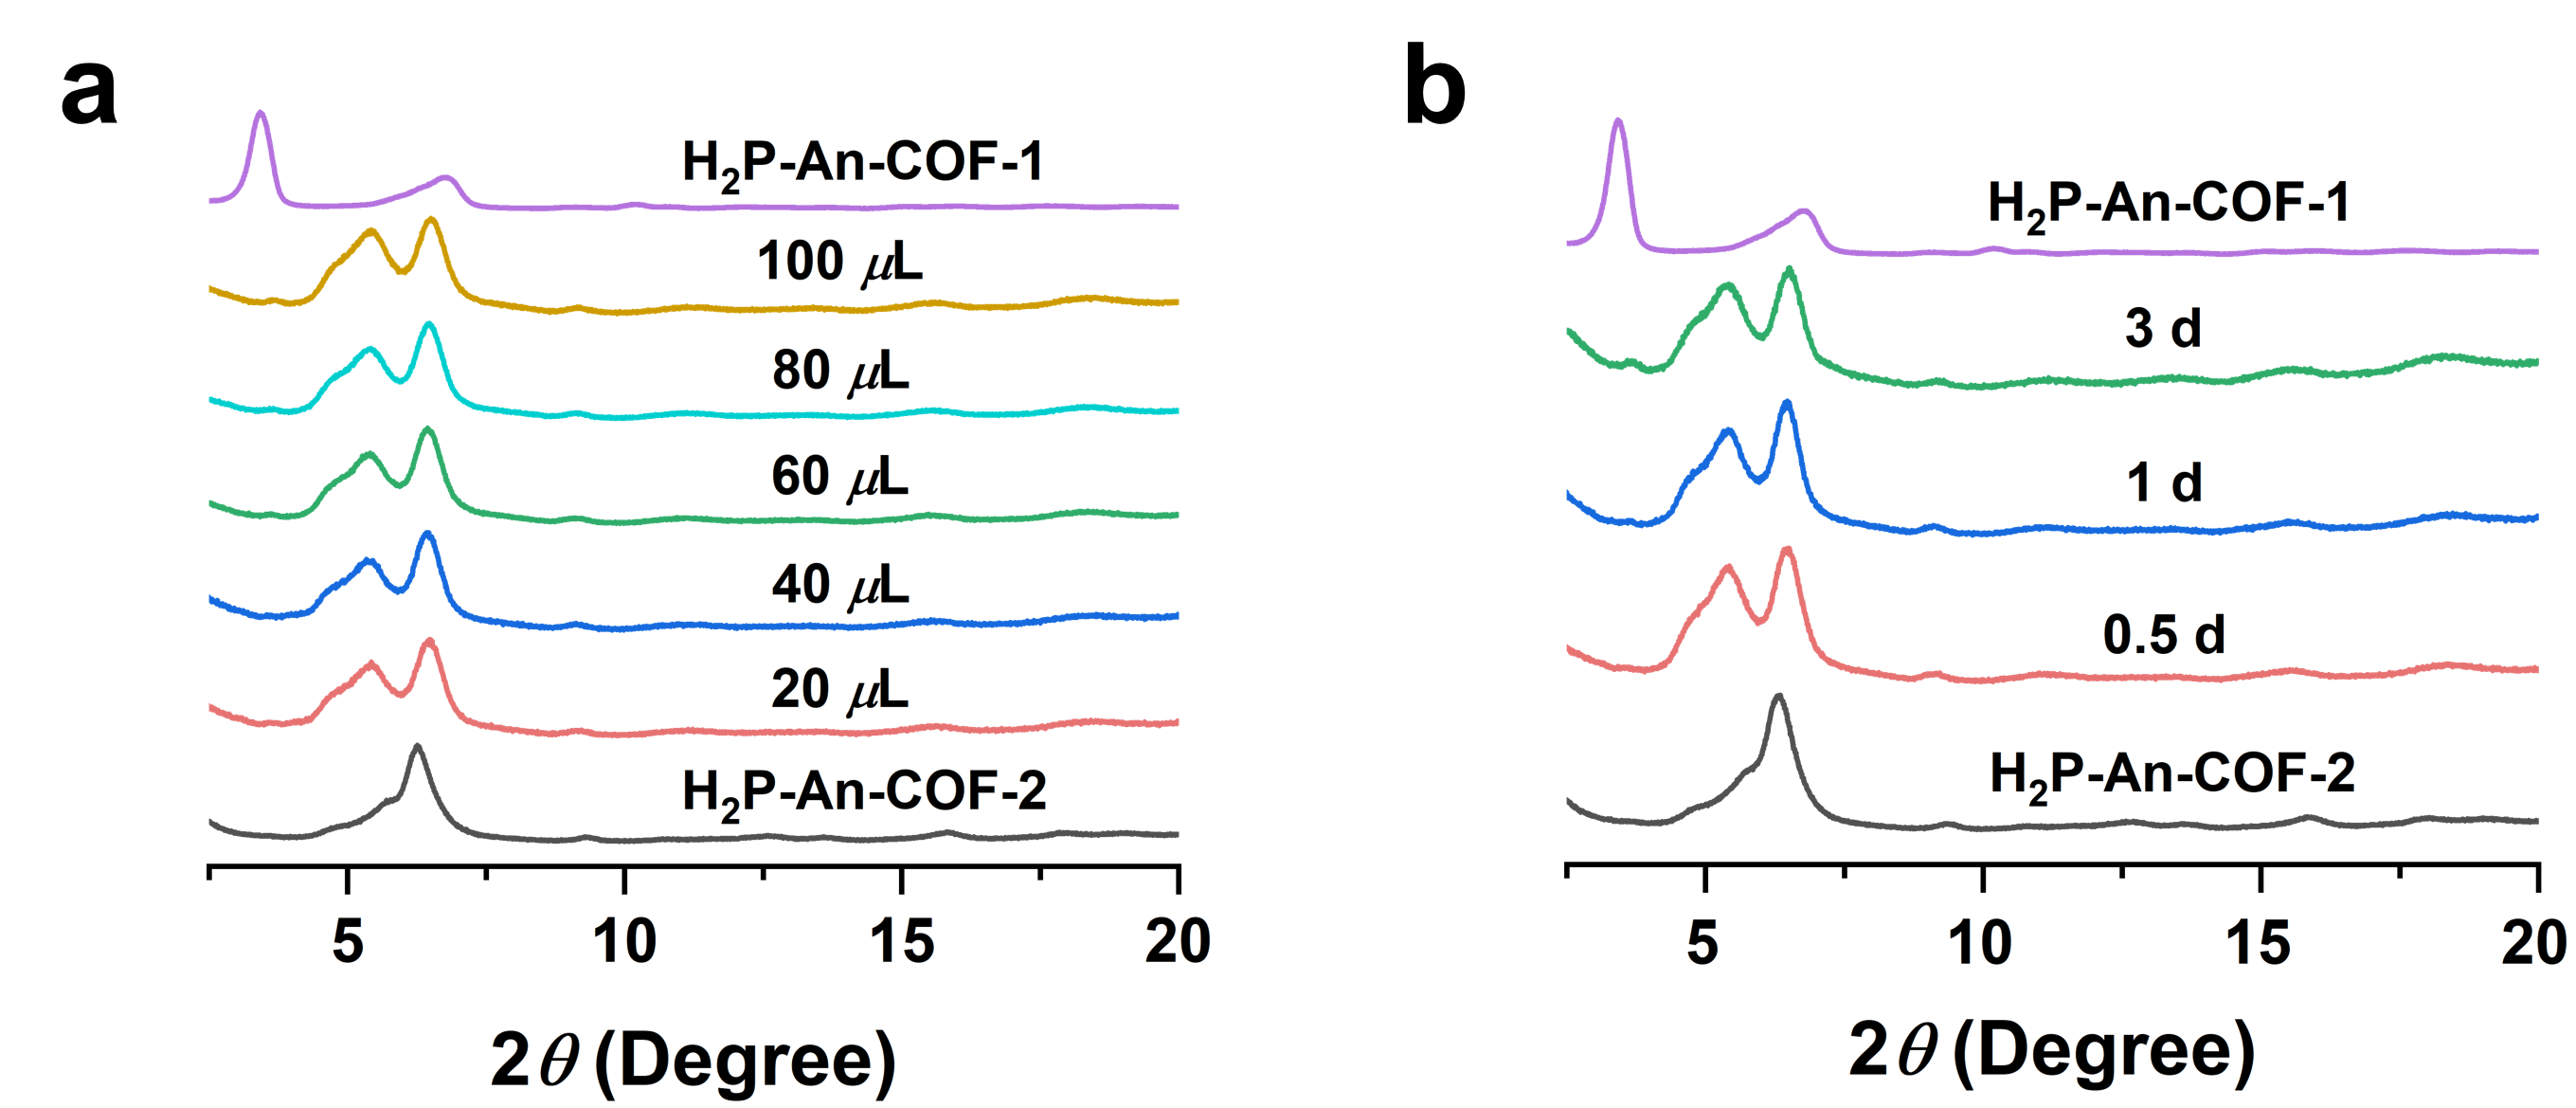


**Supplementary Fig. 16** PXRD patterns of the failed transformation from H2P-An-COF-2 to H2P-An-COF-1 (a) within five days using varying amounts of aniline and (b) within different time using 100 *m*L of aniline.


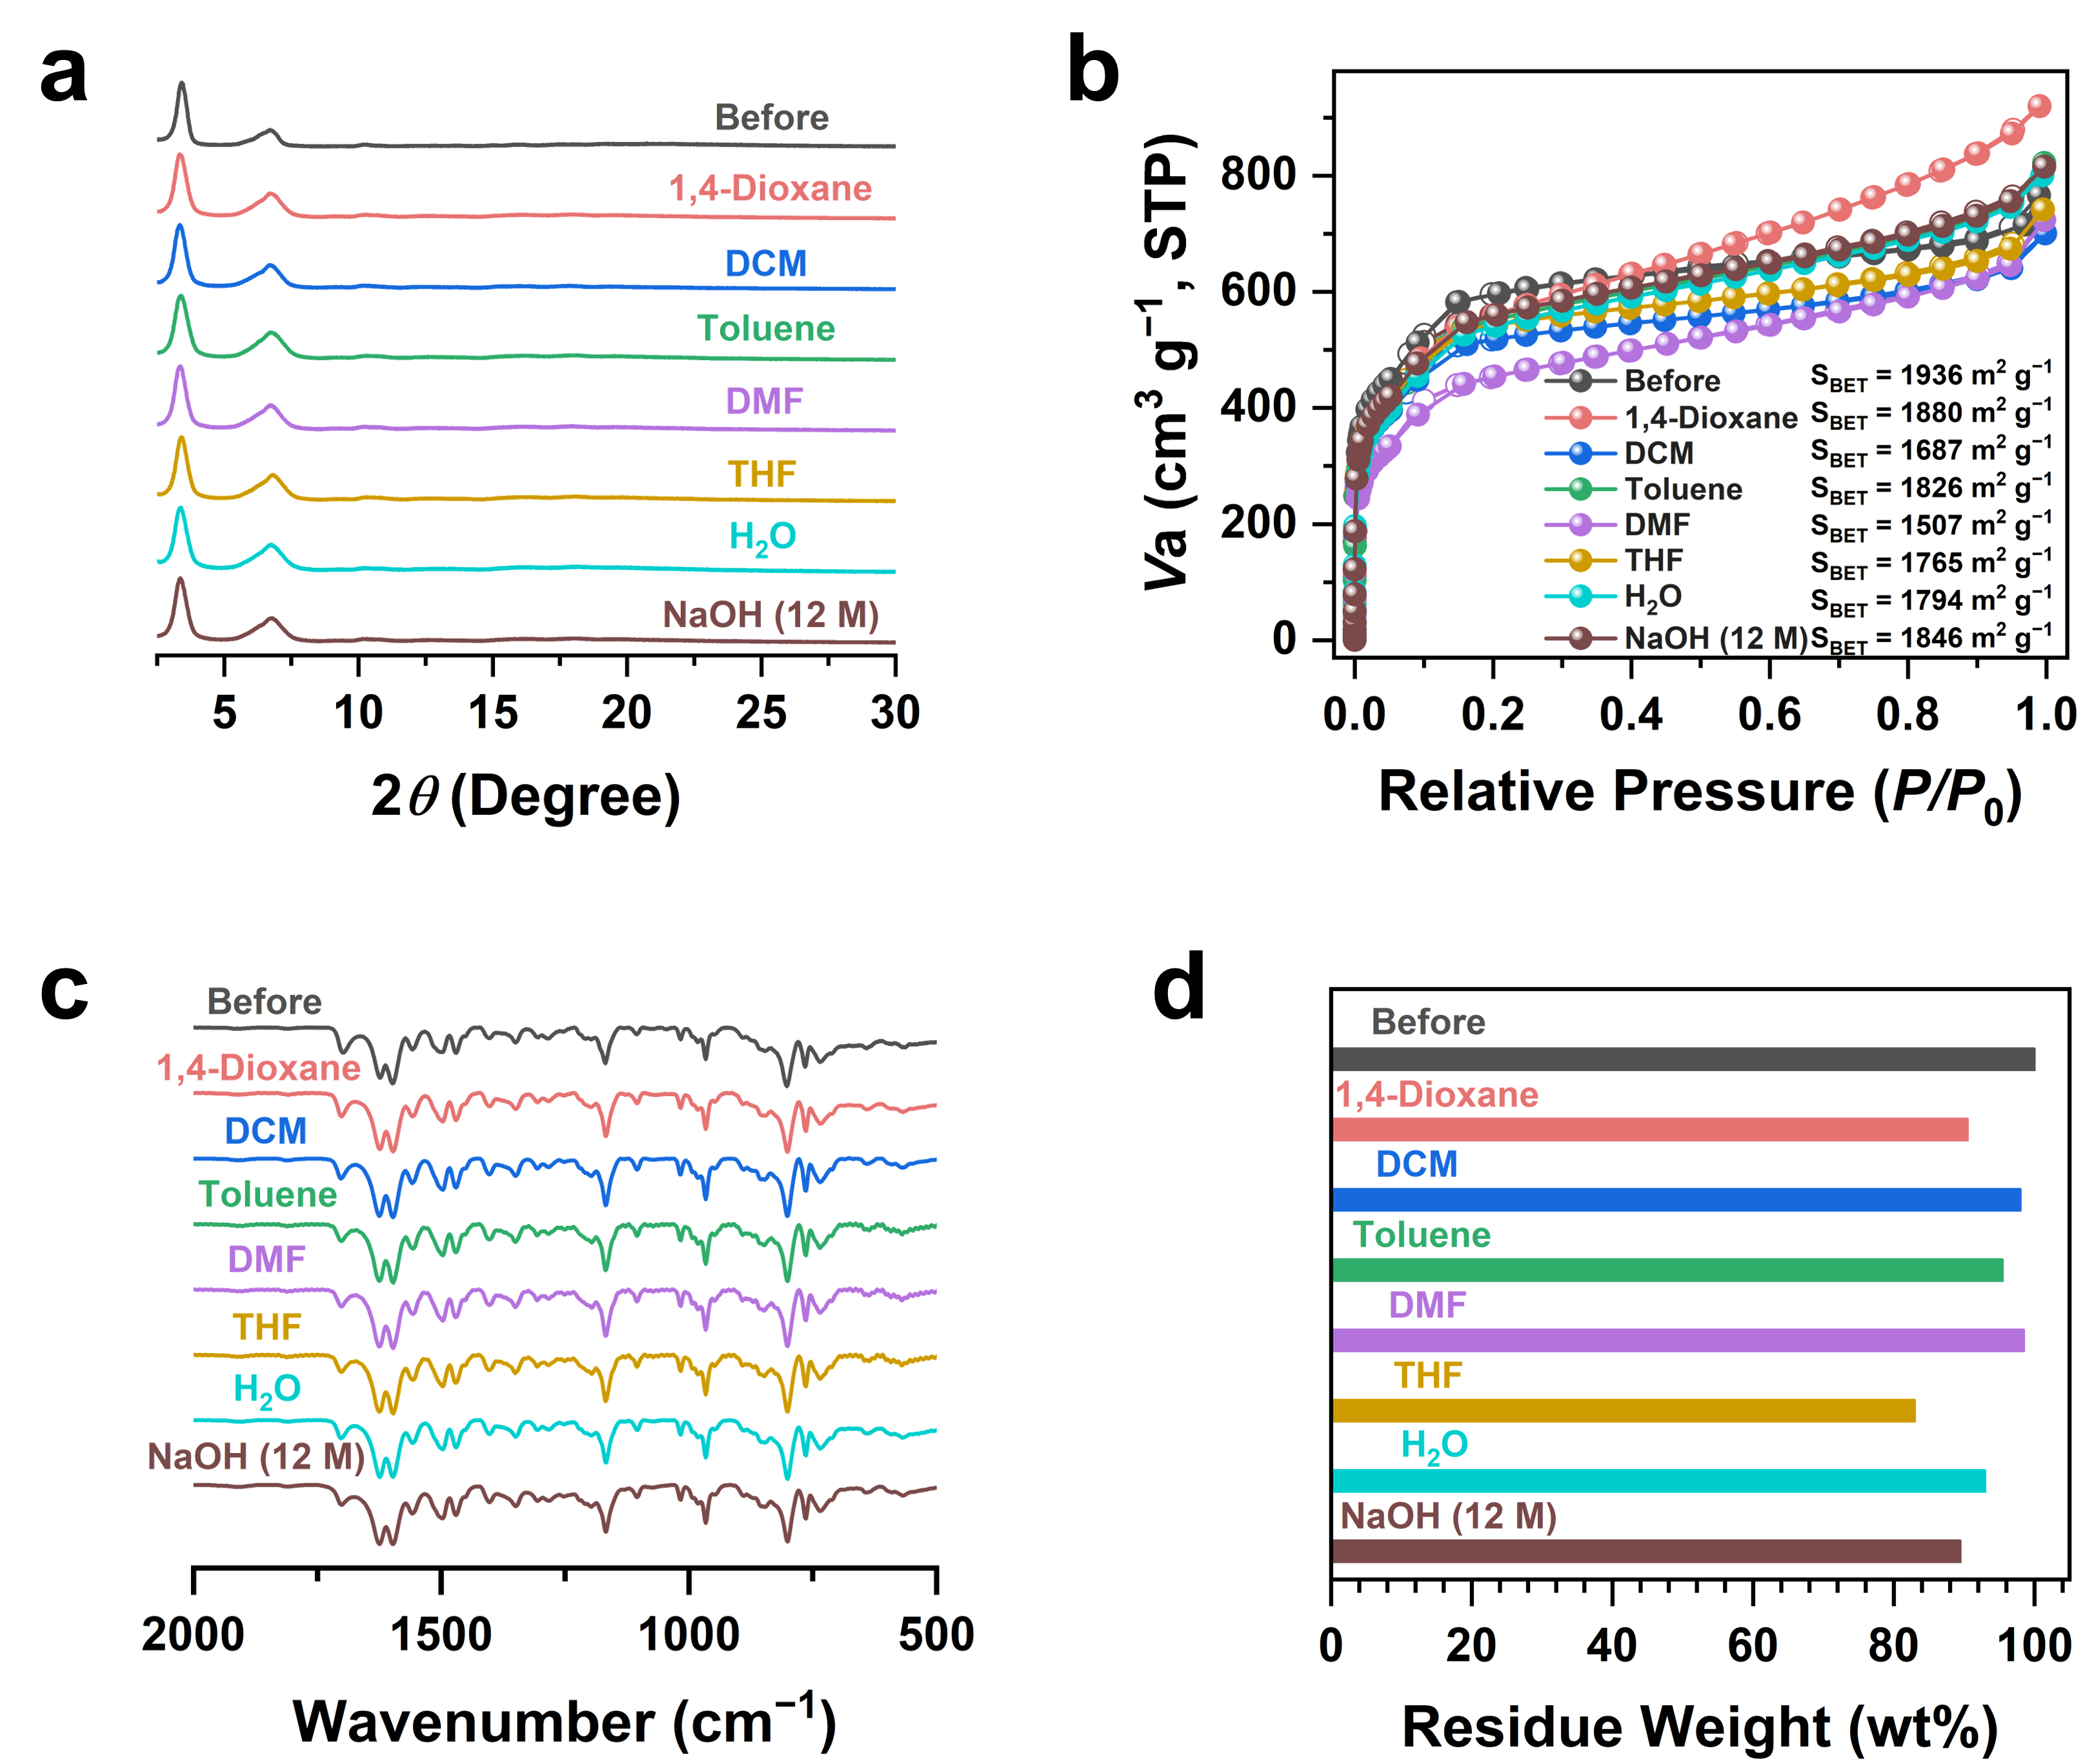


**Supplementary Fig. 17** (a) PXRD patterns, (b) nitrogen sorption isotherm curve, (c) FT-IR spectra and (d) residual weights of H2P-An-COF-1 after soaking in 1,4-dioxane, DCM, toluene, DMF, THF, H2O, and an aqueous NaOH solution (12 M) for 24 h.


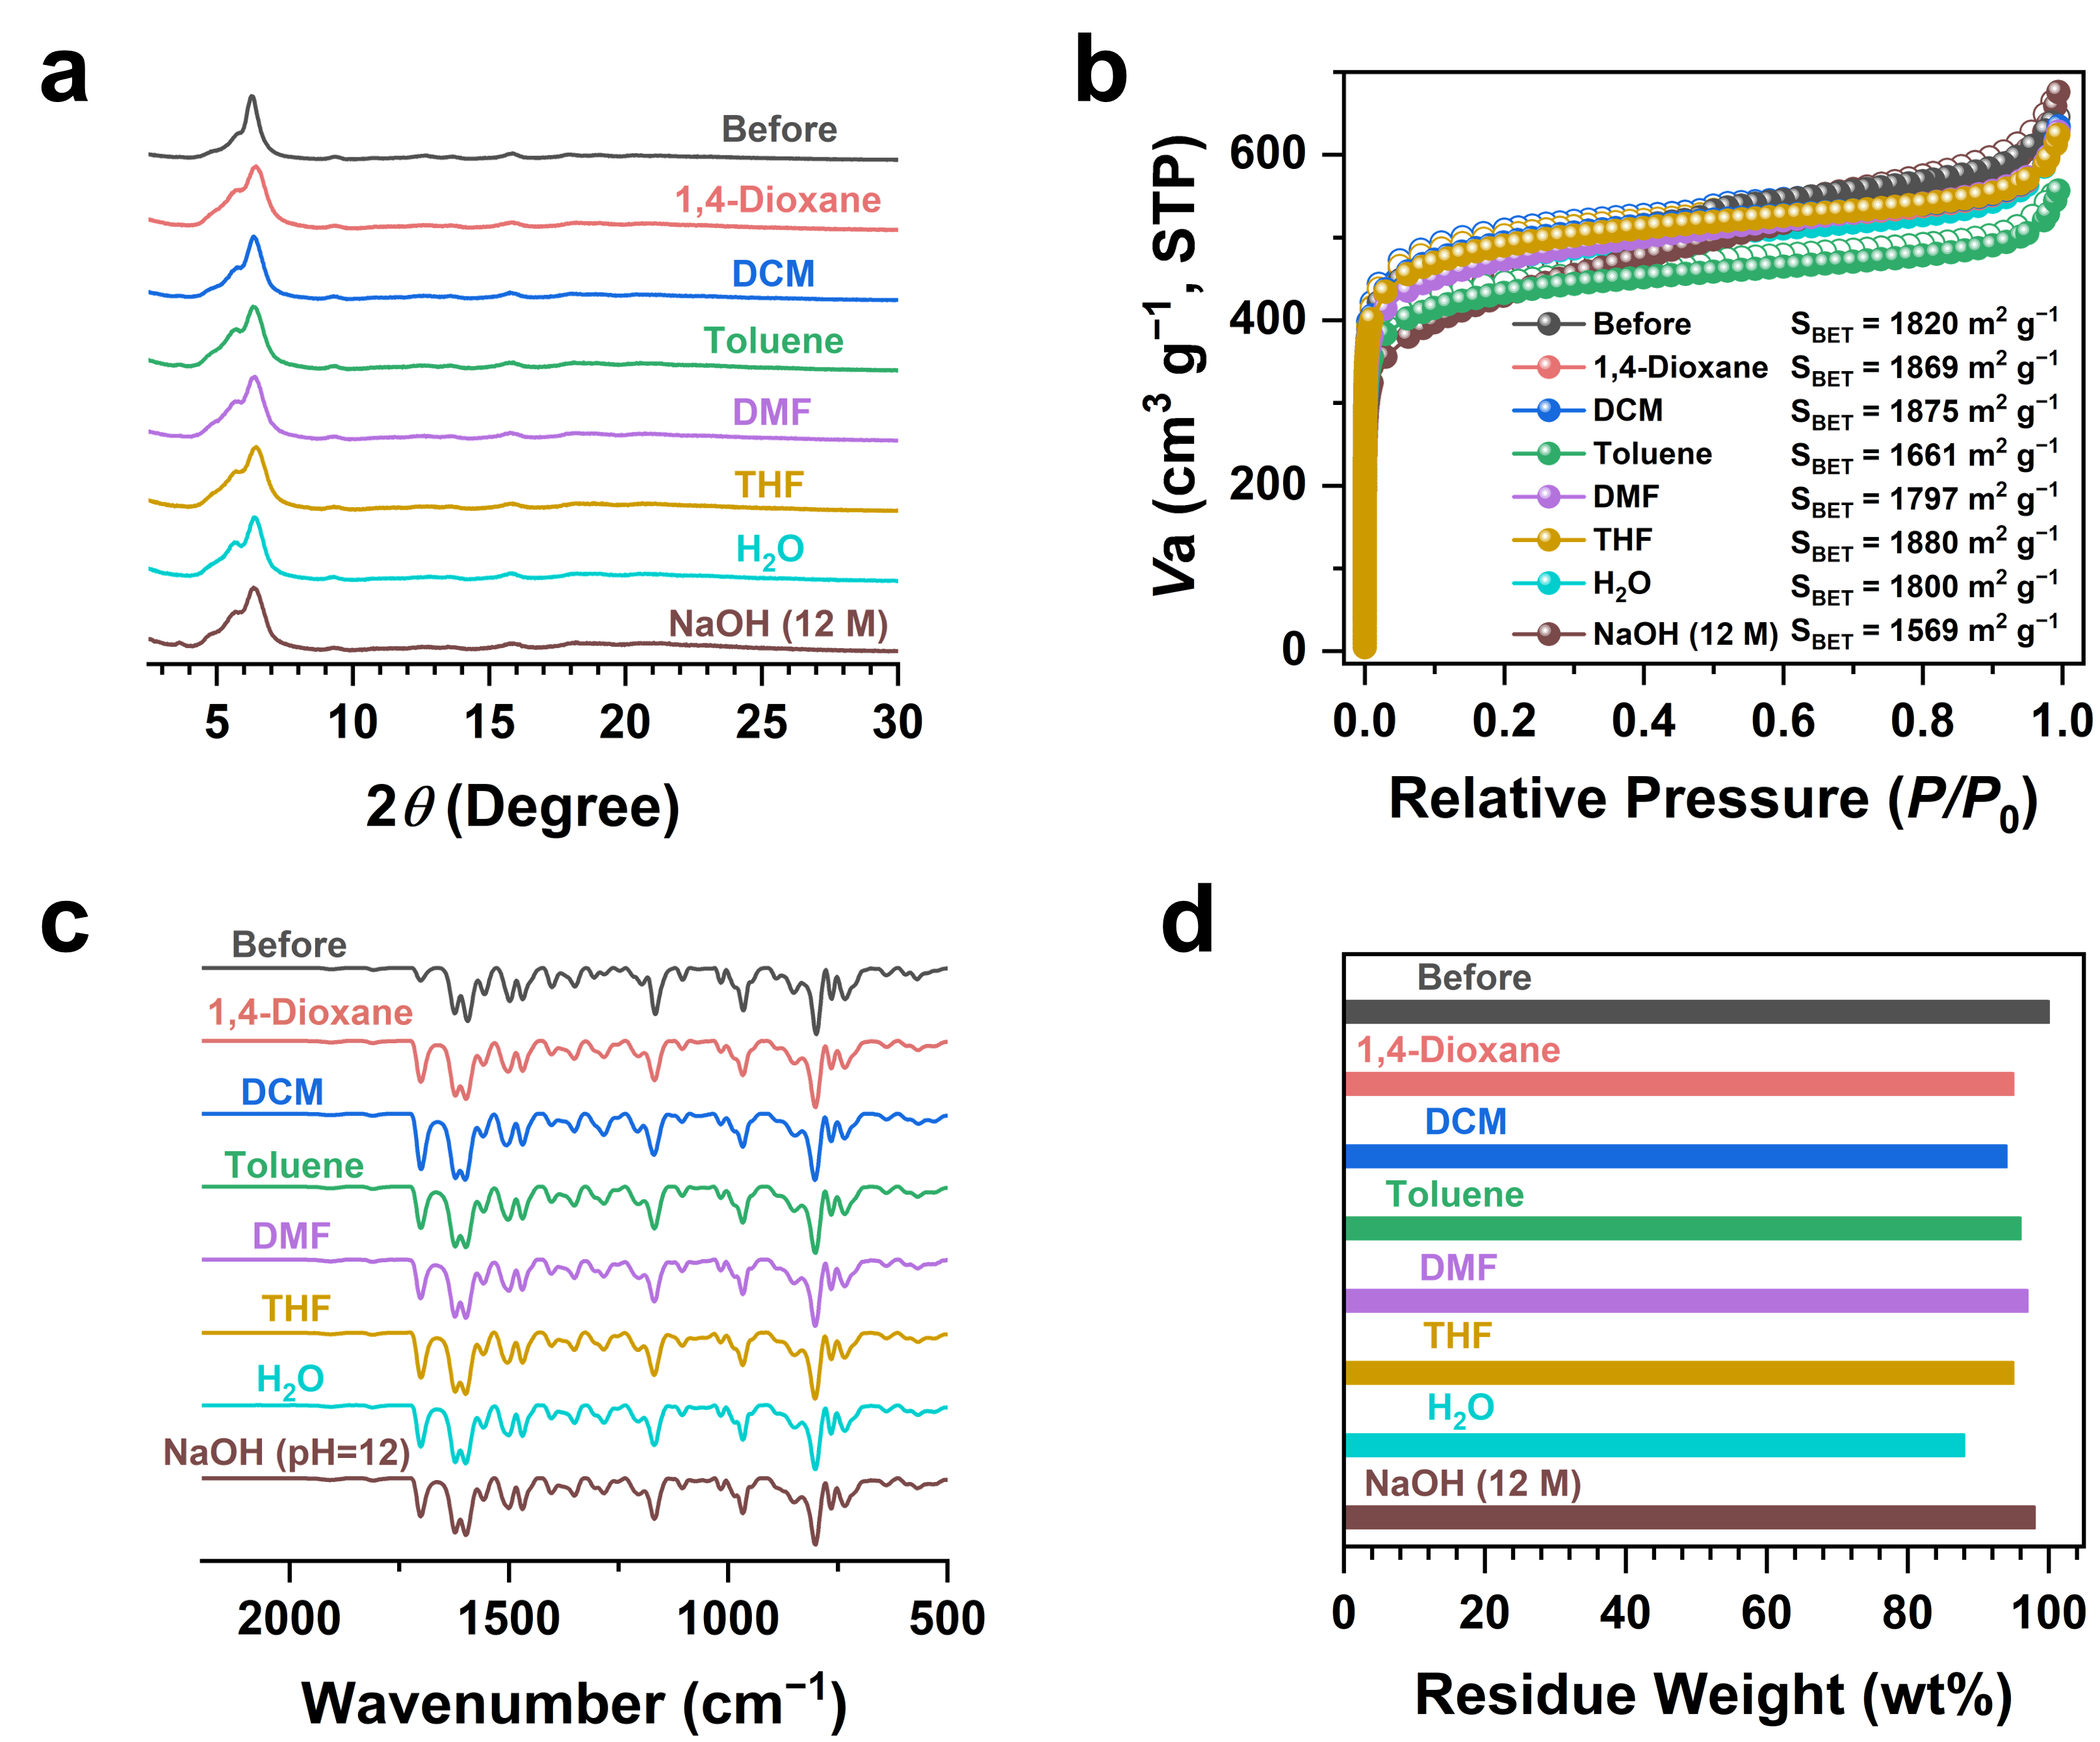


**Supplementary Fig. 18** (a) PXRD patterns, (b) nitrogen sorption isotherm curve, (c) FT-IR spectra and (d) residual weights of H2P-An-COF-2 after soaking in 1,4-dioxane, DCM, toluene, DMF, THF, H2O, and an aqueous NaOH solution (12 M) for 24 h.


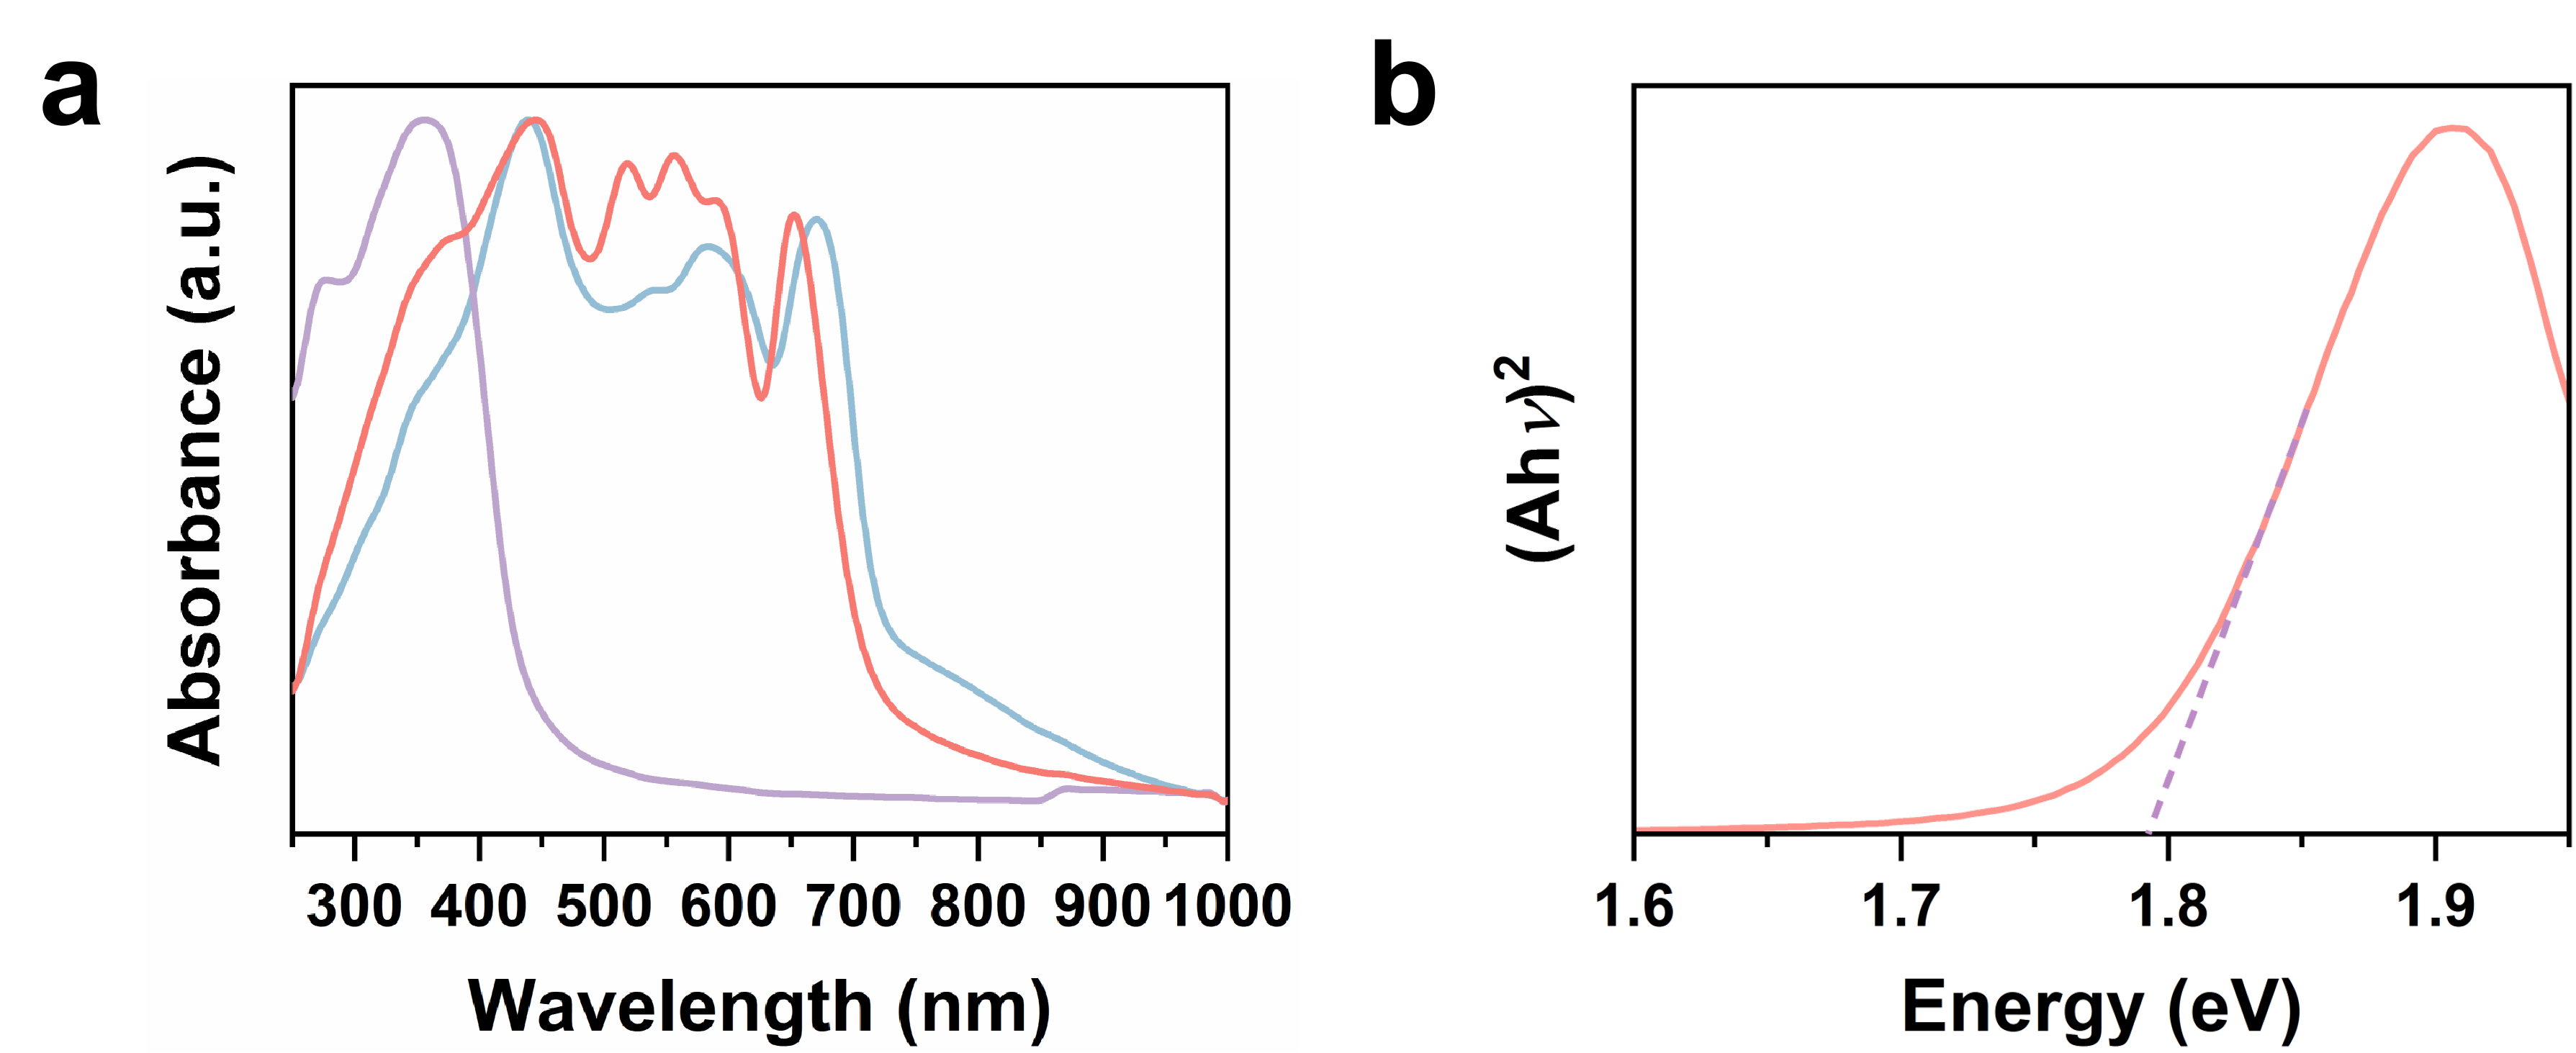


**Supplementary Fig. 19** (a) UV-Vis spectra of H2P (blue curve), An (purple curve), and H2P-An-COF-1 (red curve). (b) Tauc plot of H2P-An-COF-1.





**Supplementary Fig. 20** Tauc plot of H2P-An-COF-2.


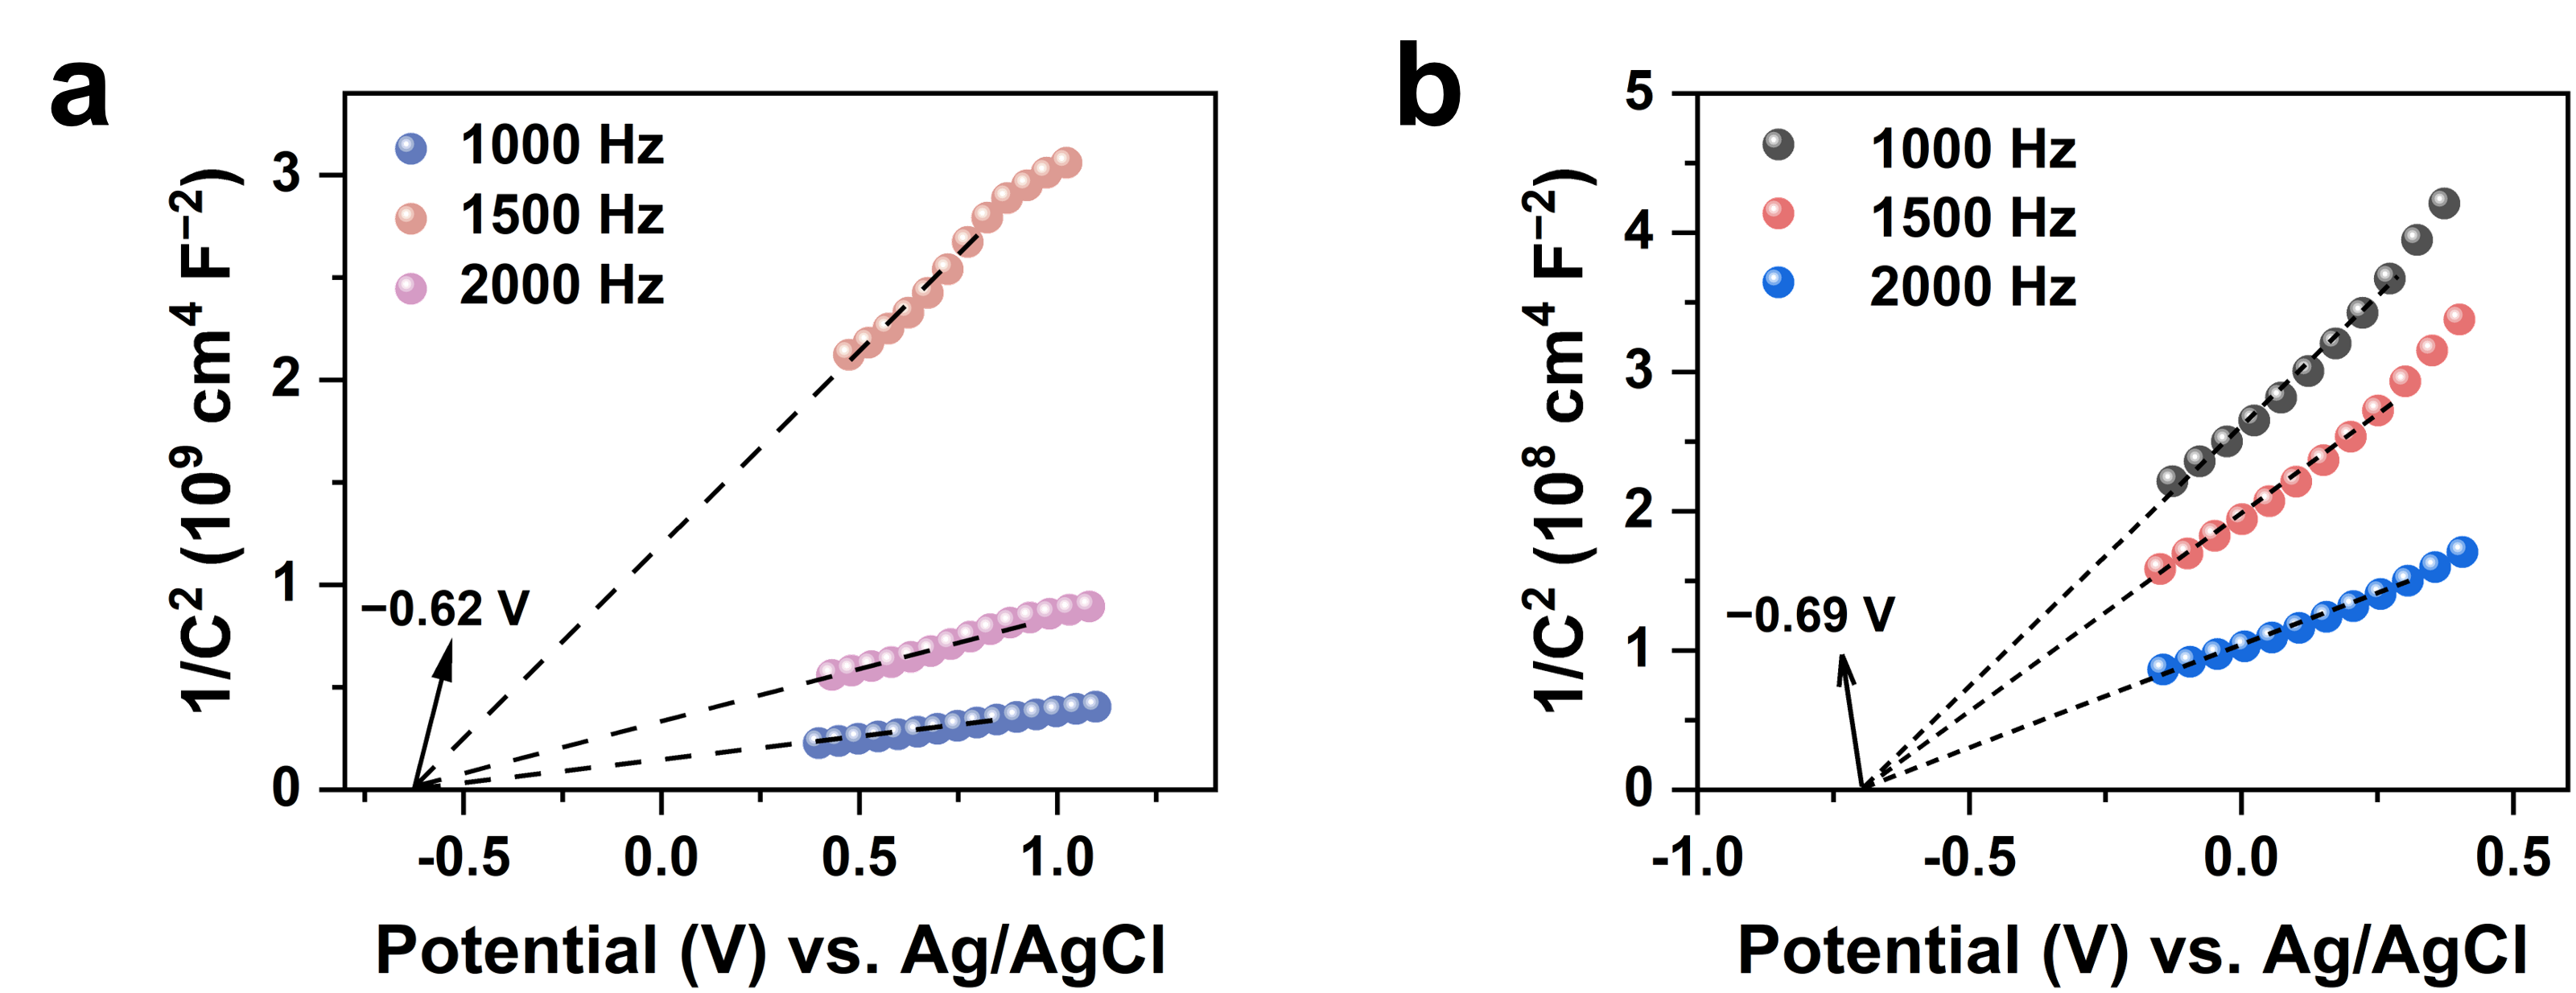


**Supplementary Fig. 21** Mott-Schottky plots of (a) H2P-An-COF-1 and (b) H2P-An-COF-2. The flat band potential derived from the intersection with the X-axis was −0.62 V for H2P-An-COF-1 and −0.69 V for H2P-An-COF-2 vs Ag/AgCl.


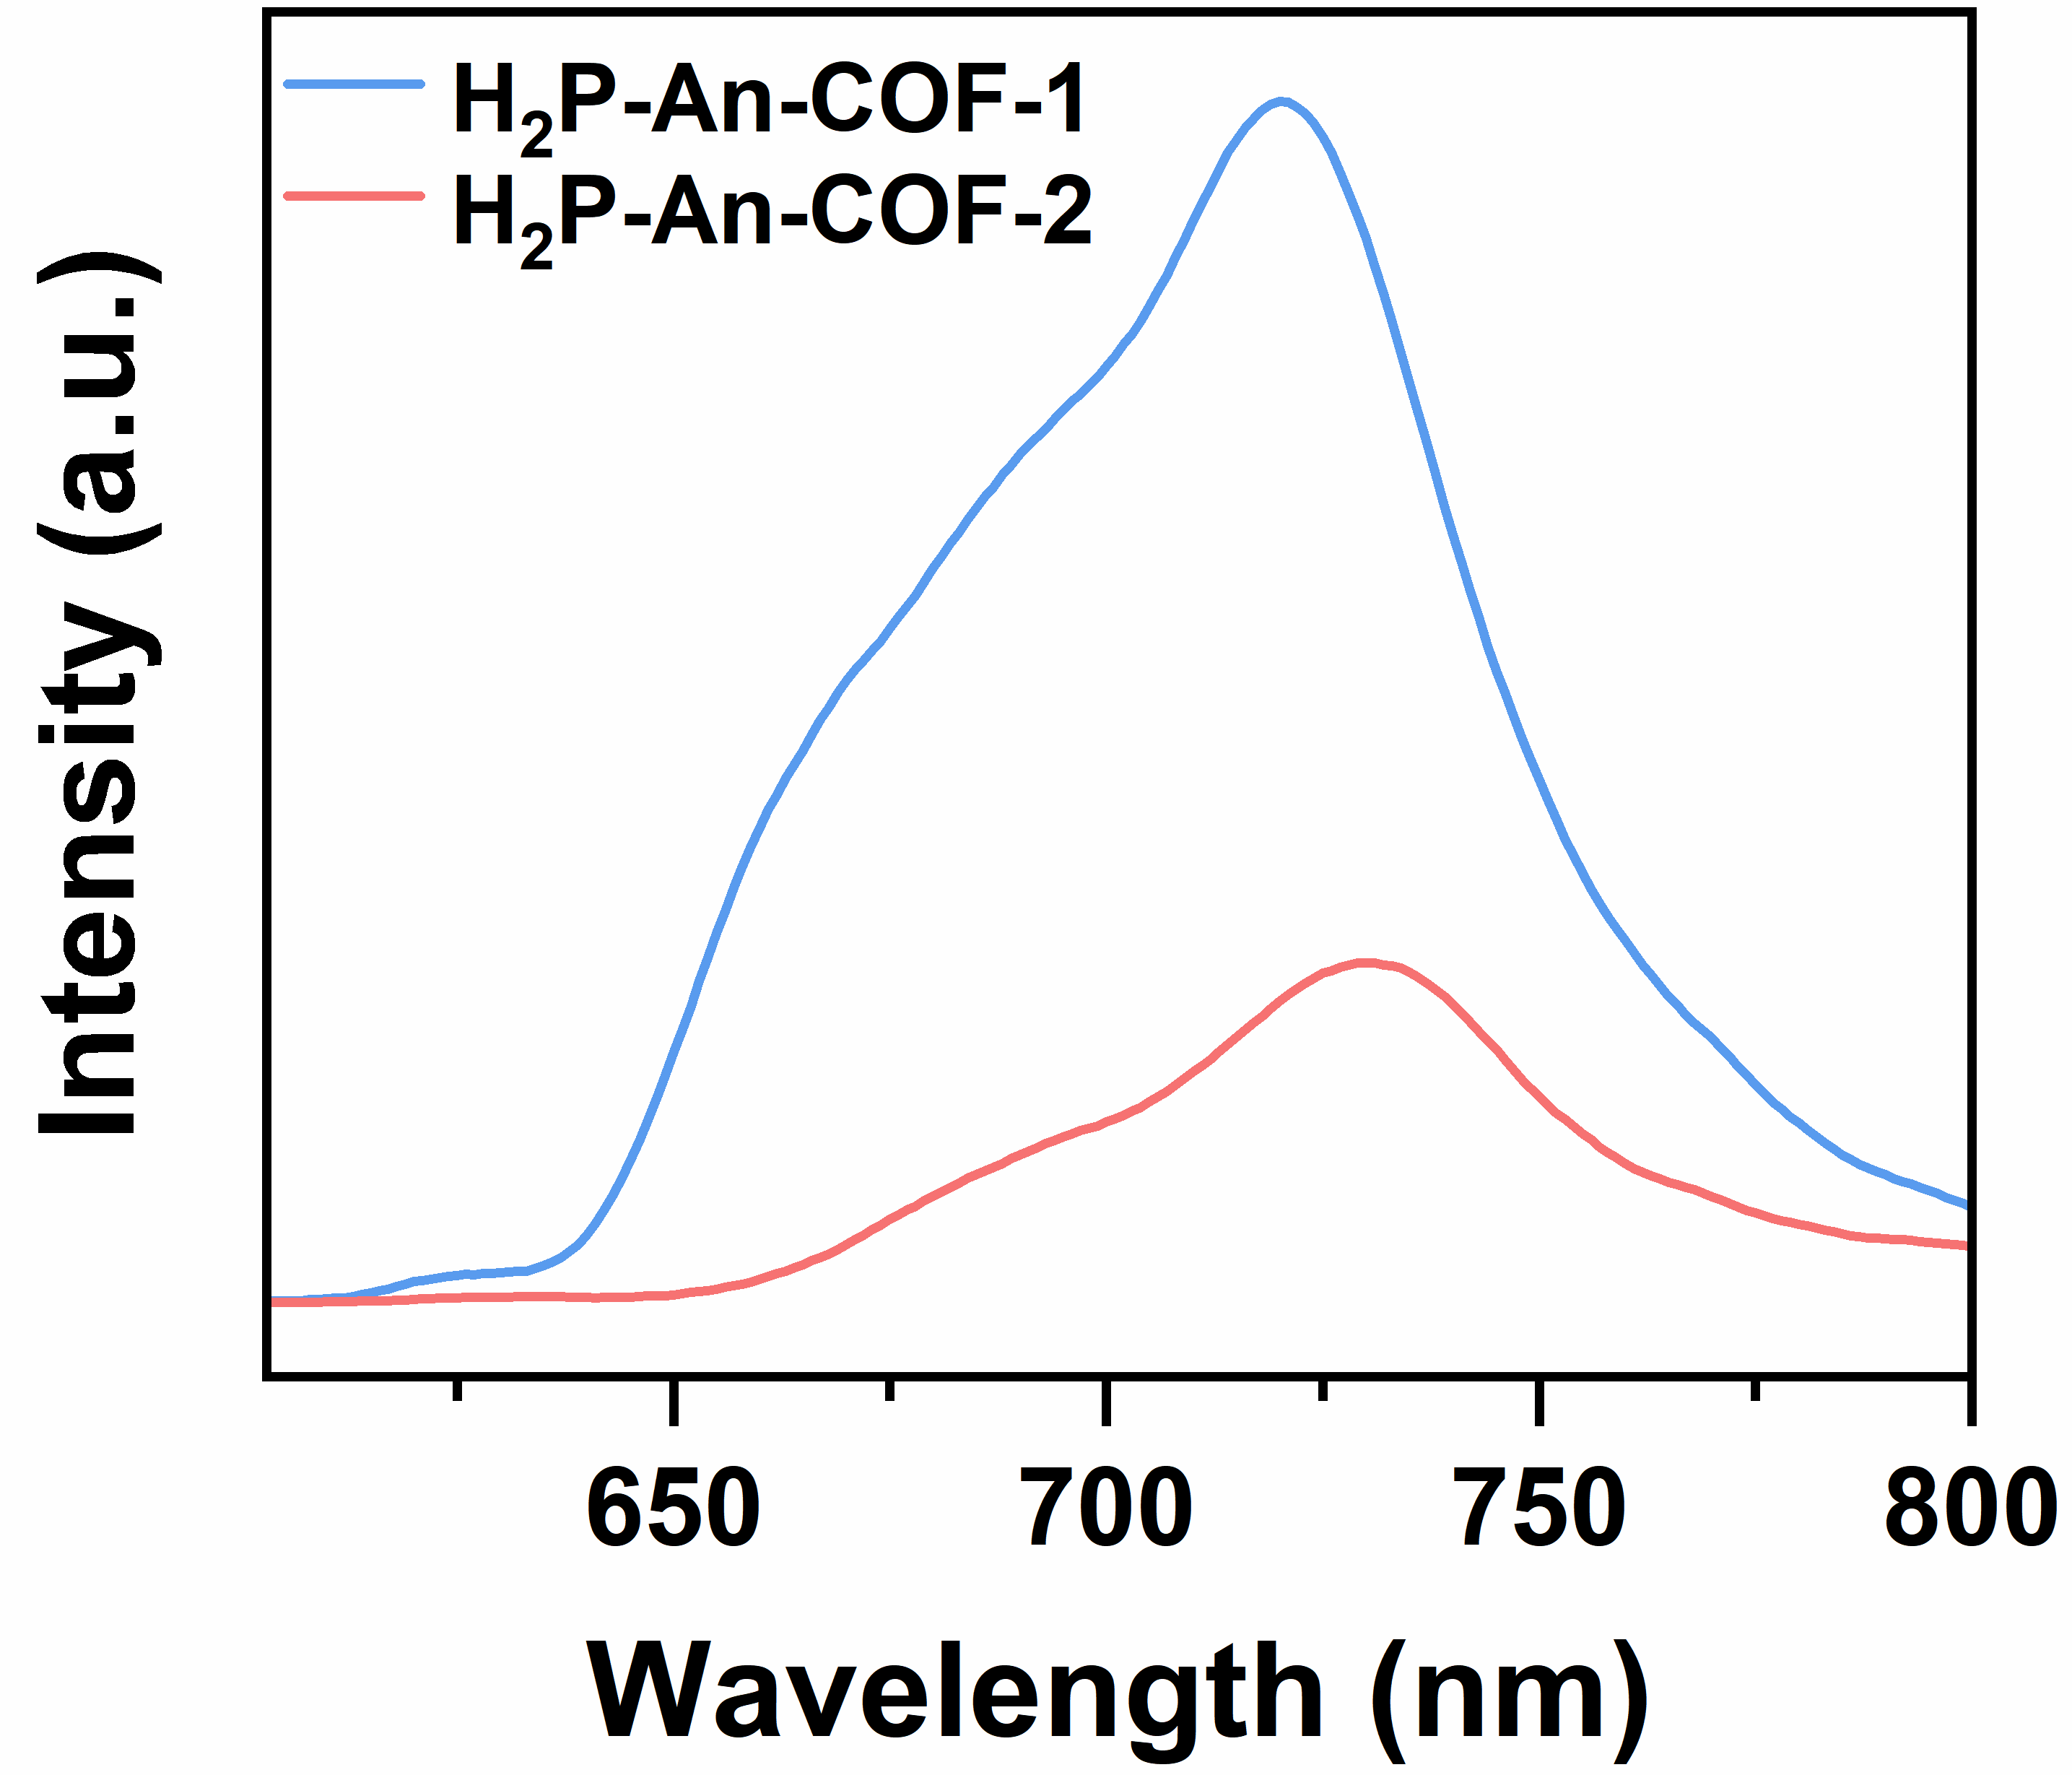


**Supplementary Fig. 22** PL spectra of H2P-An-COF-1 and H2P-An-COF-2.





**Supplementary Fig. 23** Fluorescence decay proﬁle of H2P-An-COF-1 and H2P-An-COF-2.





**Supplementary Fig. 24** EPR conduction band electron spectra of H2P-An-COF-1 and H2P-An-COF-2 under light condition.


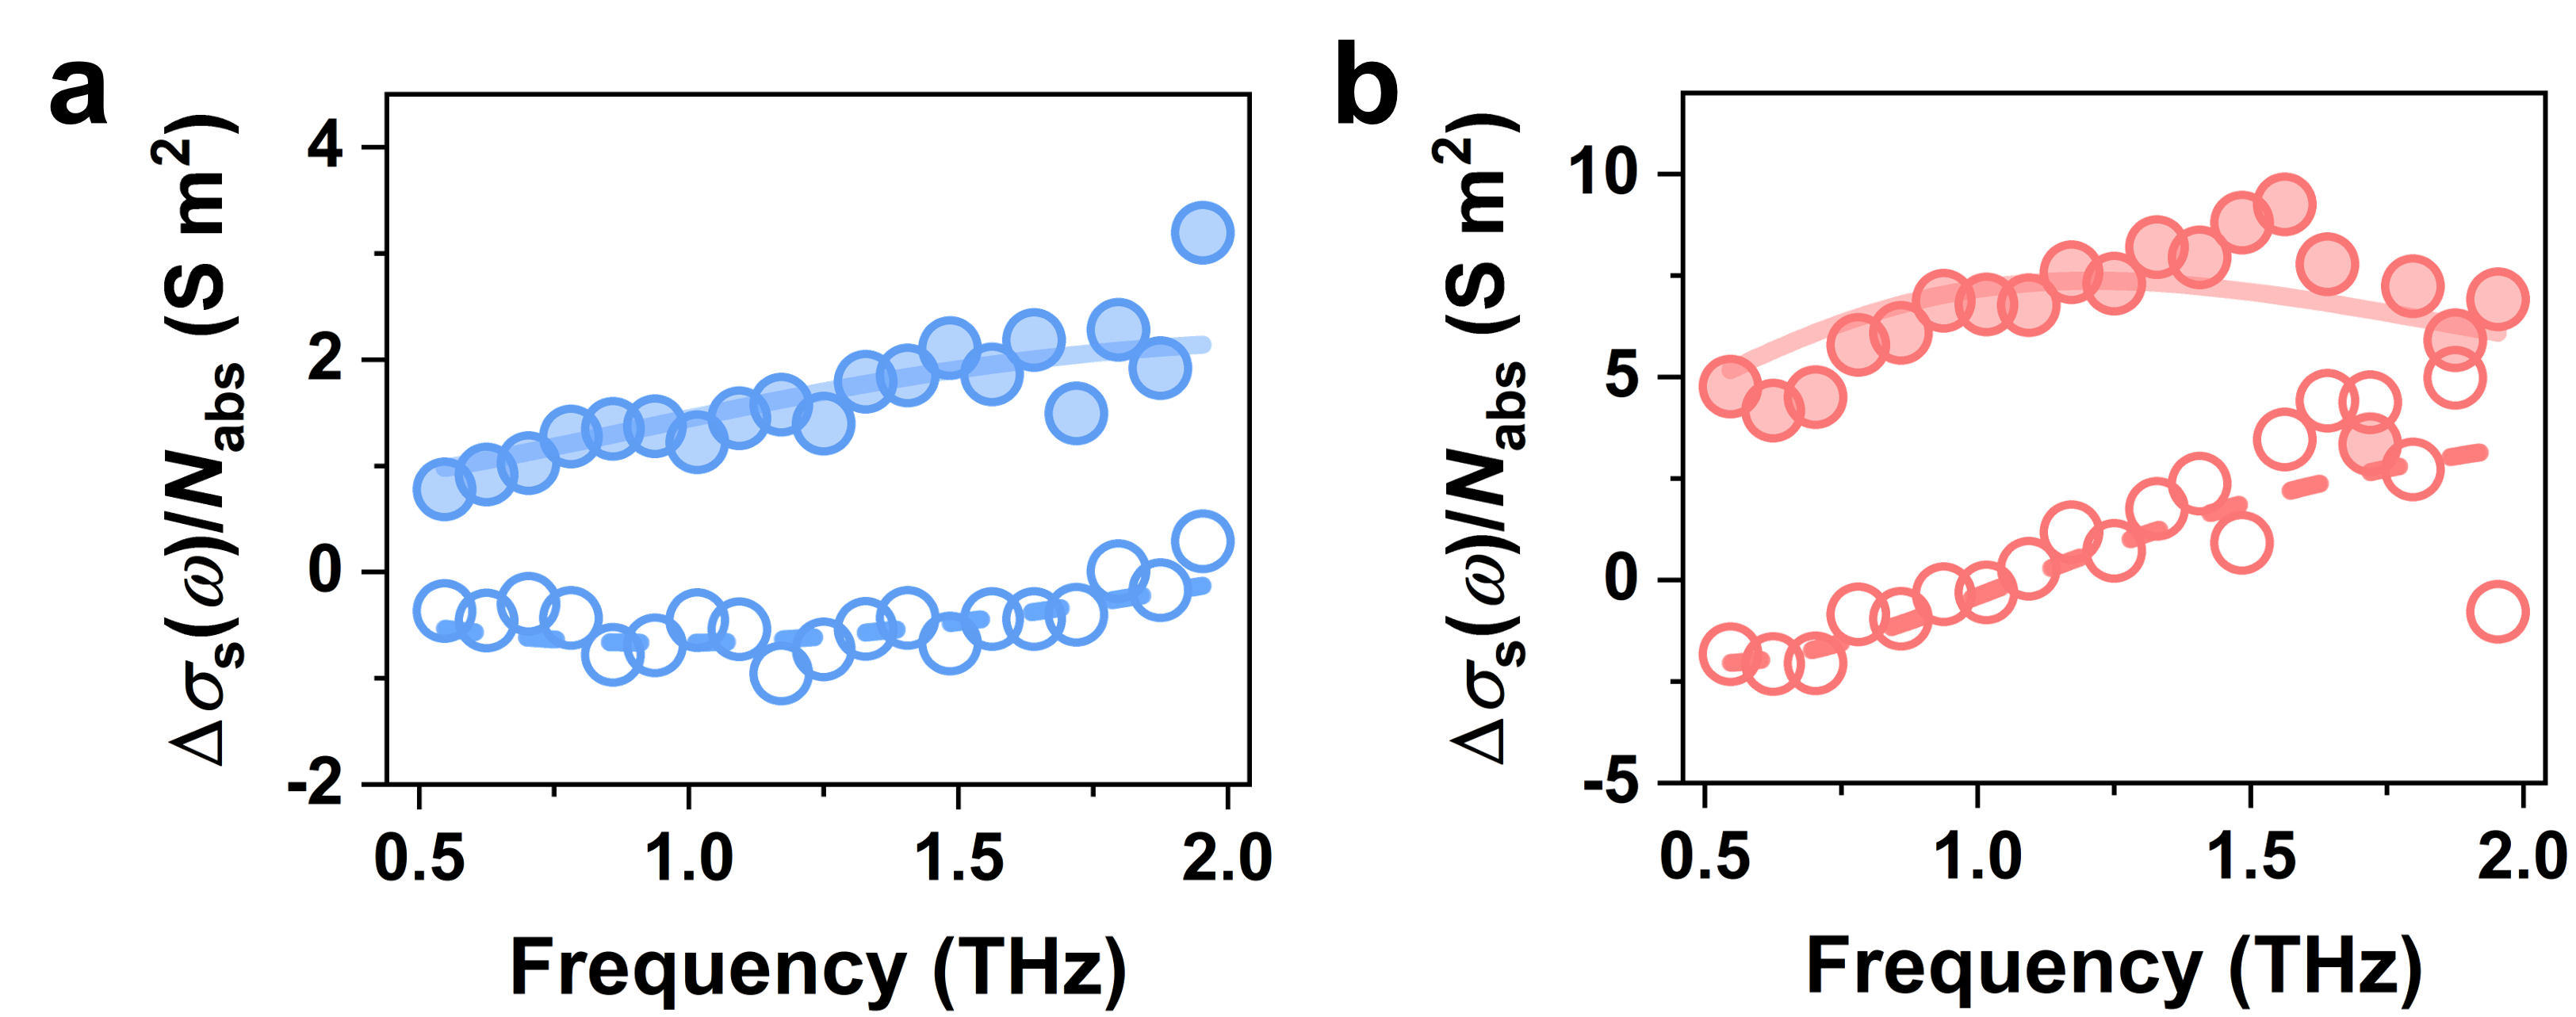


**Supplementary Fig. 25** Frequency-resolved photoconductivity (Δ*s* (*w*)) of (a) H2P-An-COF-1 and (b) H2P-An-COF-2 measured at 0.5 ps after the maximum photoconductivity.





**Supplementary Fig. 26** EIS spectra of H2P-An-COF-1 (blue dots) and of H2P-An-COF-2 (red dots).





**Supplementary Fig. 27** Transient photocurrents of H2P-An-COF-1 (blue curve) and of H2P-An-COF-2 (red curve).


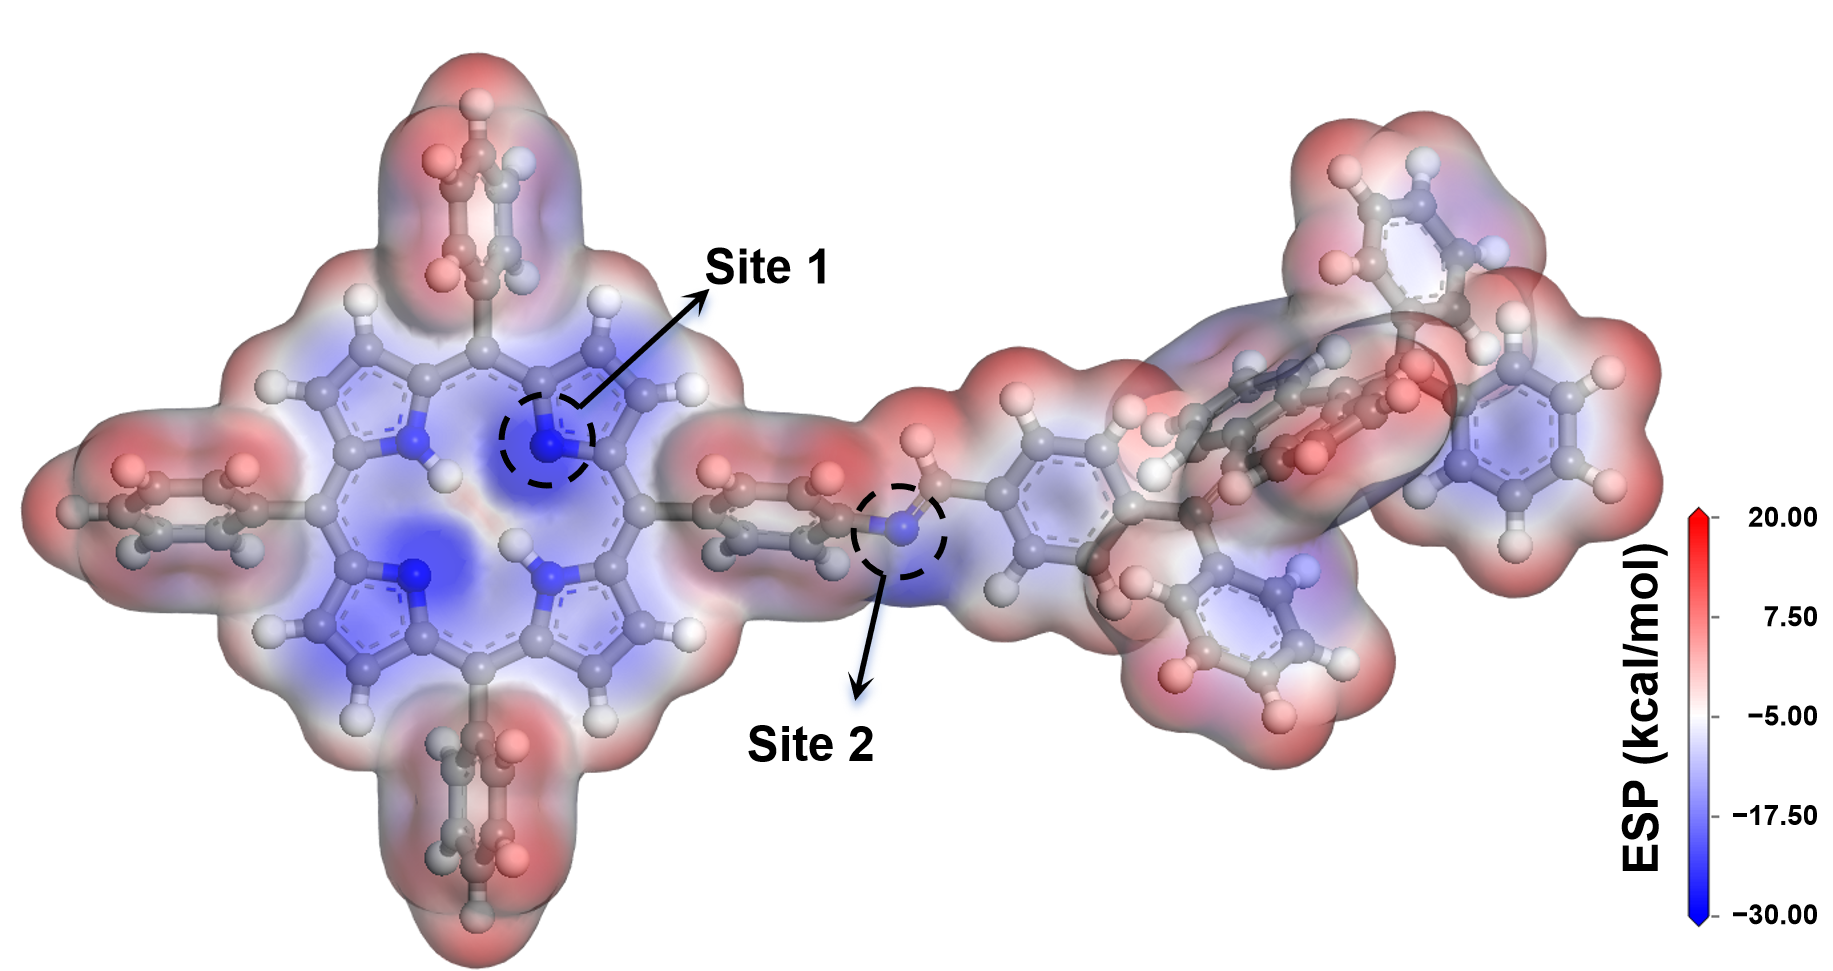


**Supplementary Fig. 28** The electrostatic potential (ESP) for H2P-An-COF-1 and H2P-An-COF-2.


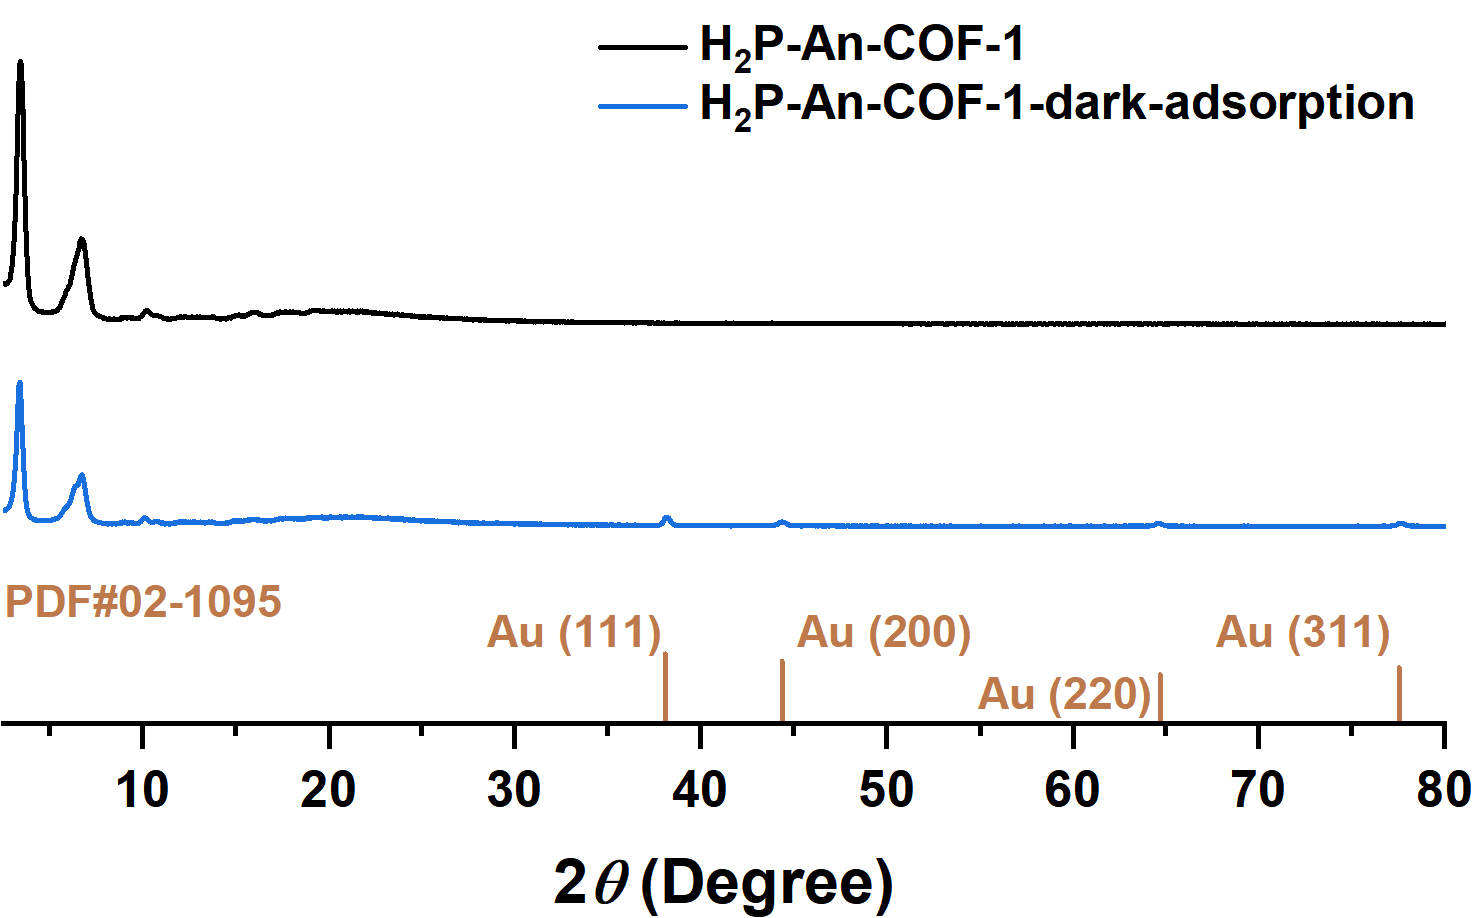


**Supplementary Fig. 29** PXRD patterns of H2P-An-COF-1 after gold desorption under dark conditions compared with the pristine samples.


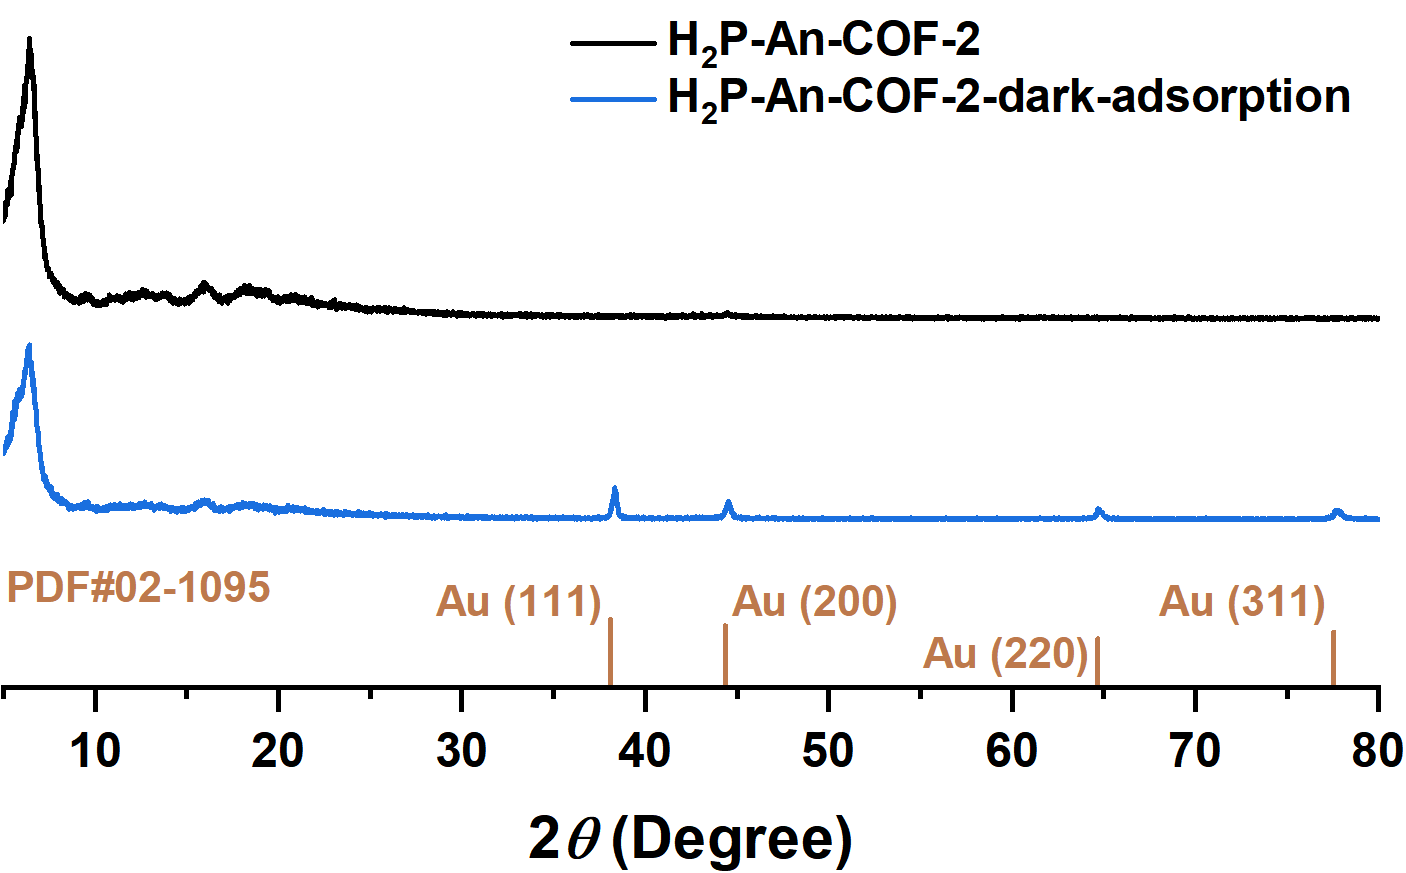


**Supplementary Fig. 30** PXRD patterns of H2P-An-COF-2 after gold desorption under dark conditions compared with the pristine samples.


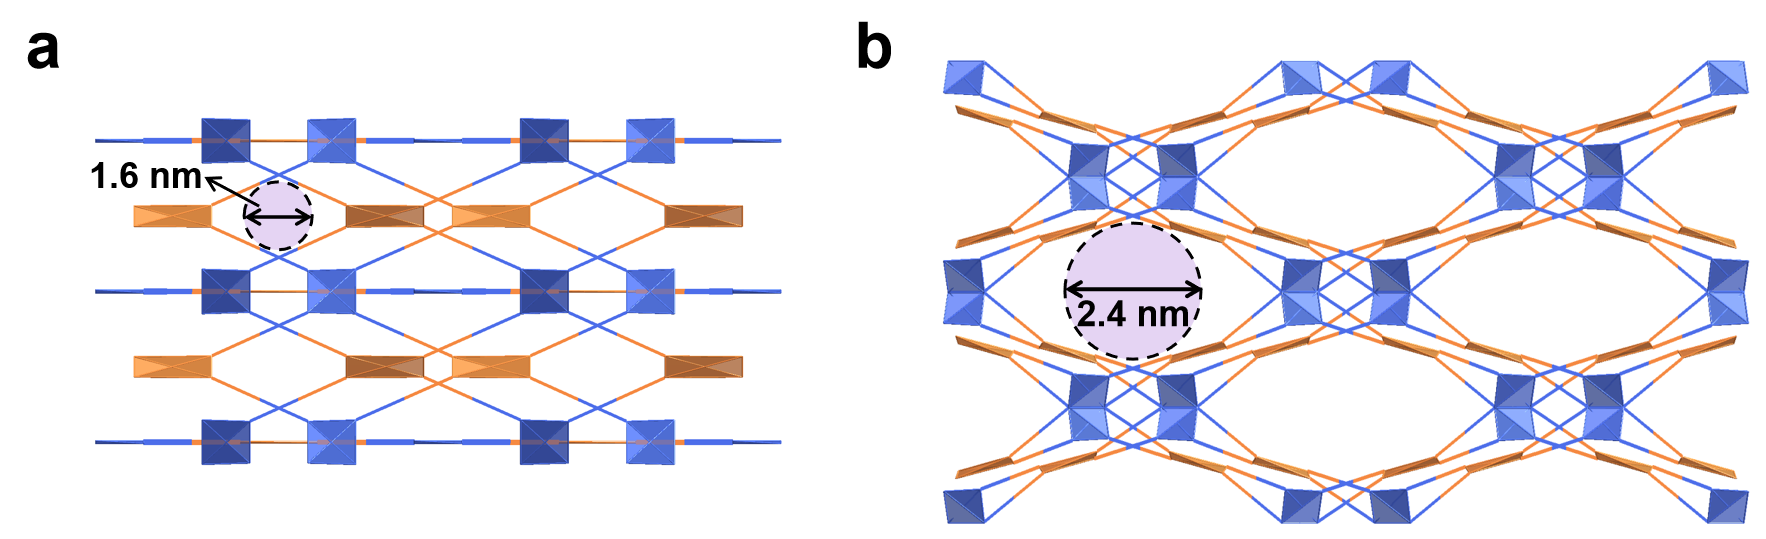


**Supplementary Fig. 31** Topological models of (a) H2P-An-COF-2 and (b) H2P-An-COF-1.





**Supplementary Fig. 32** EPR experiments of •O2− by DMPO under dark (black curve for on H2P-An-COF-1 and purple curve for H2P-An-COF-2) and illumination for 5 min (blue curve for H2P-An-COF-1 and red curve for H2P-An-COF-2).


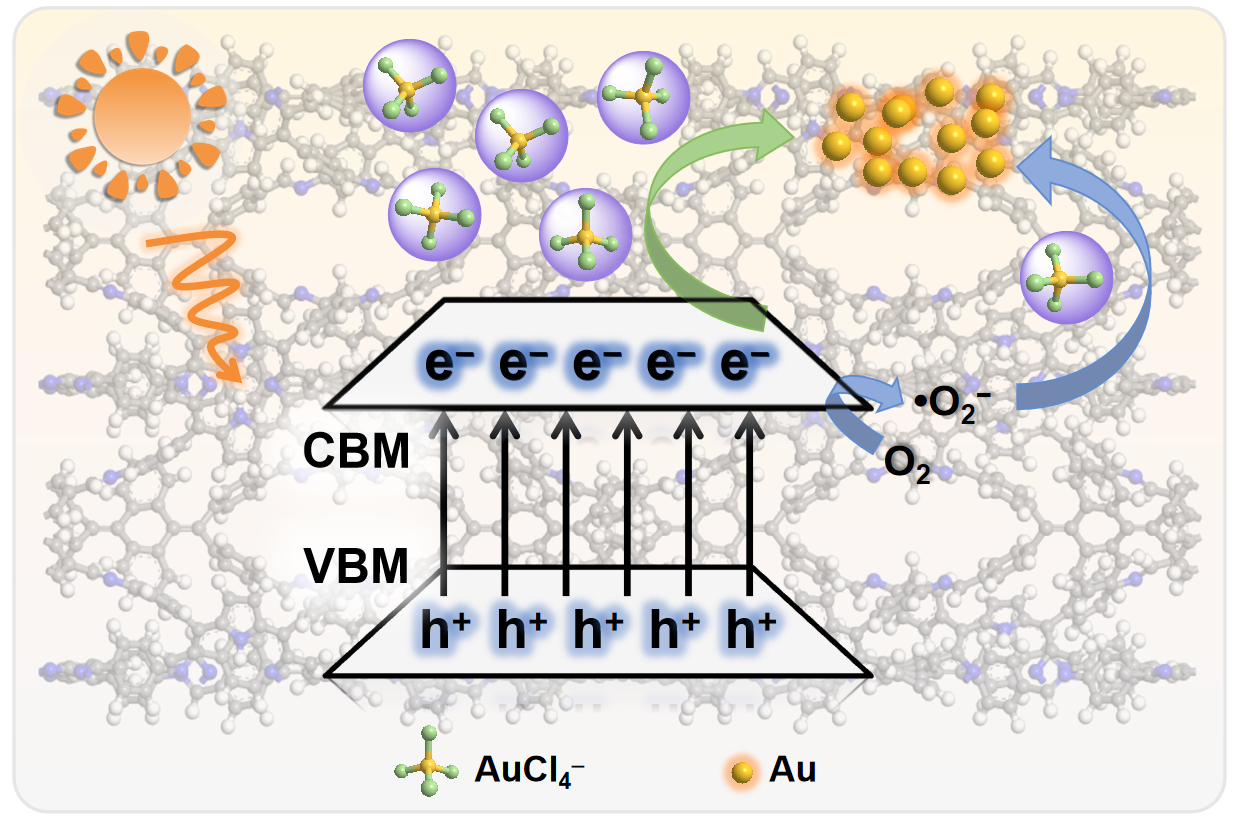


**Supplementary Fig. 33** Proposed mechanism diagram of H2P-An-COFs for gold recovery performance.





**Supplementary Fig. 34** Comparison of gold adsorption performance of COF-366, H2P-An-COF-1, and H2P-An-COF-2 under dark and light conditions.


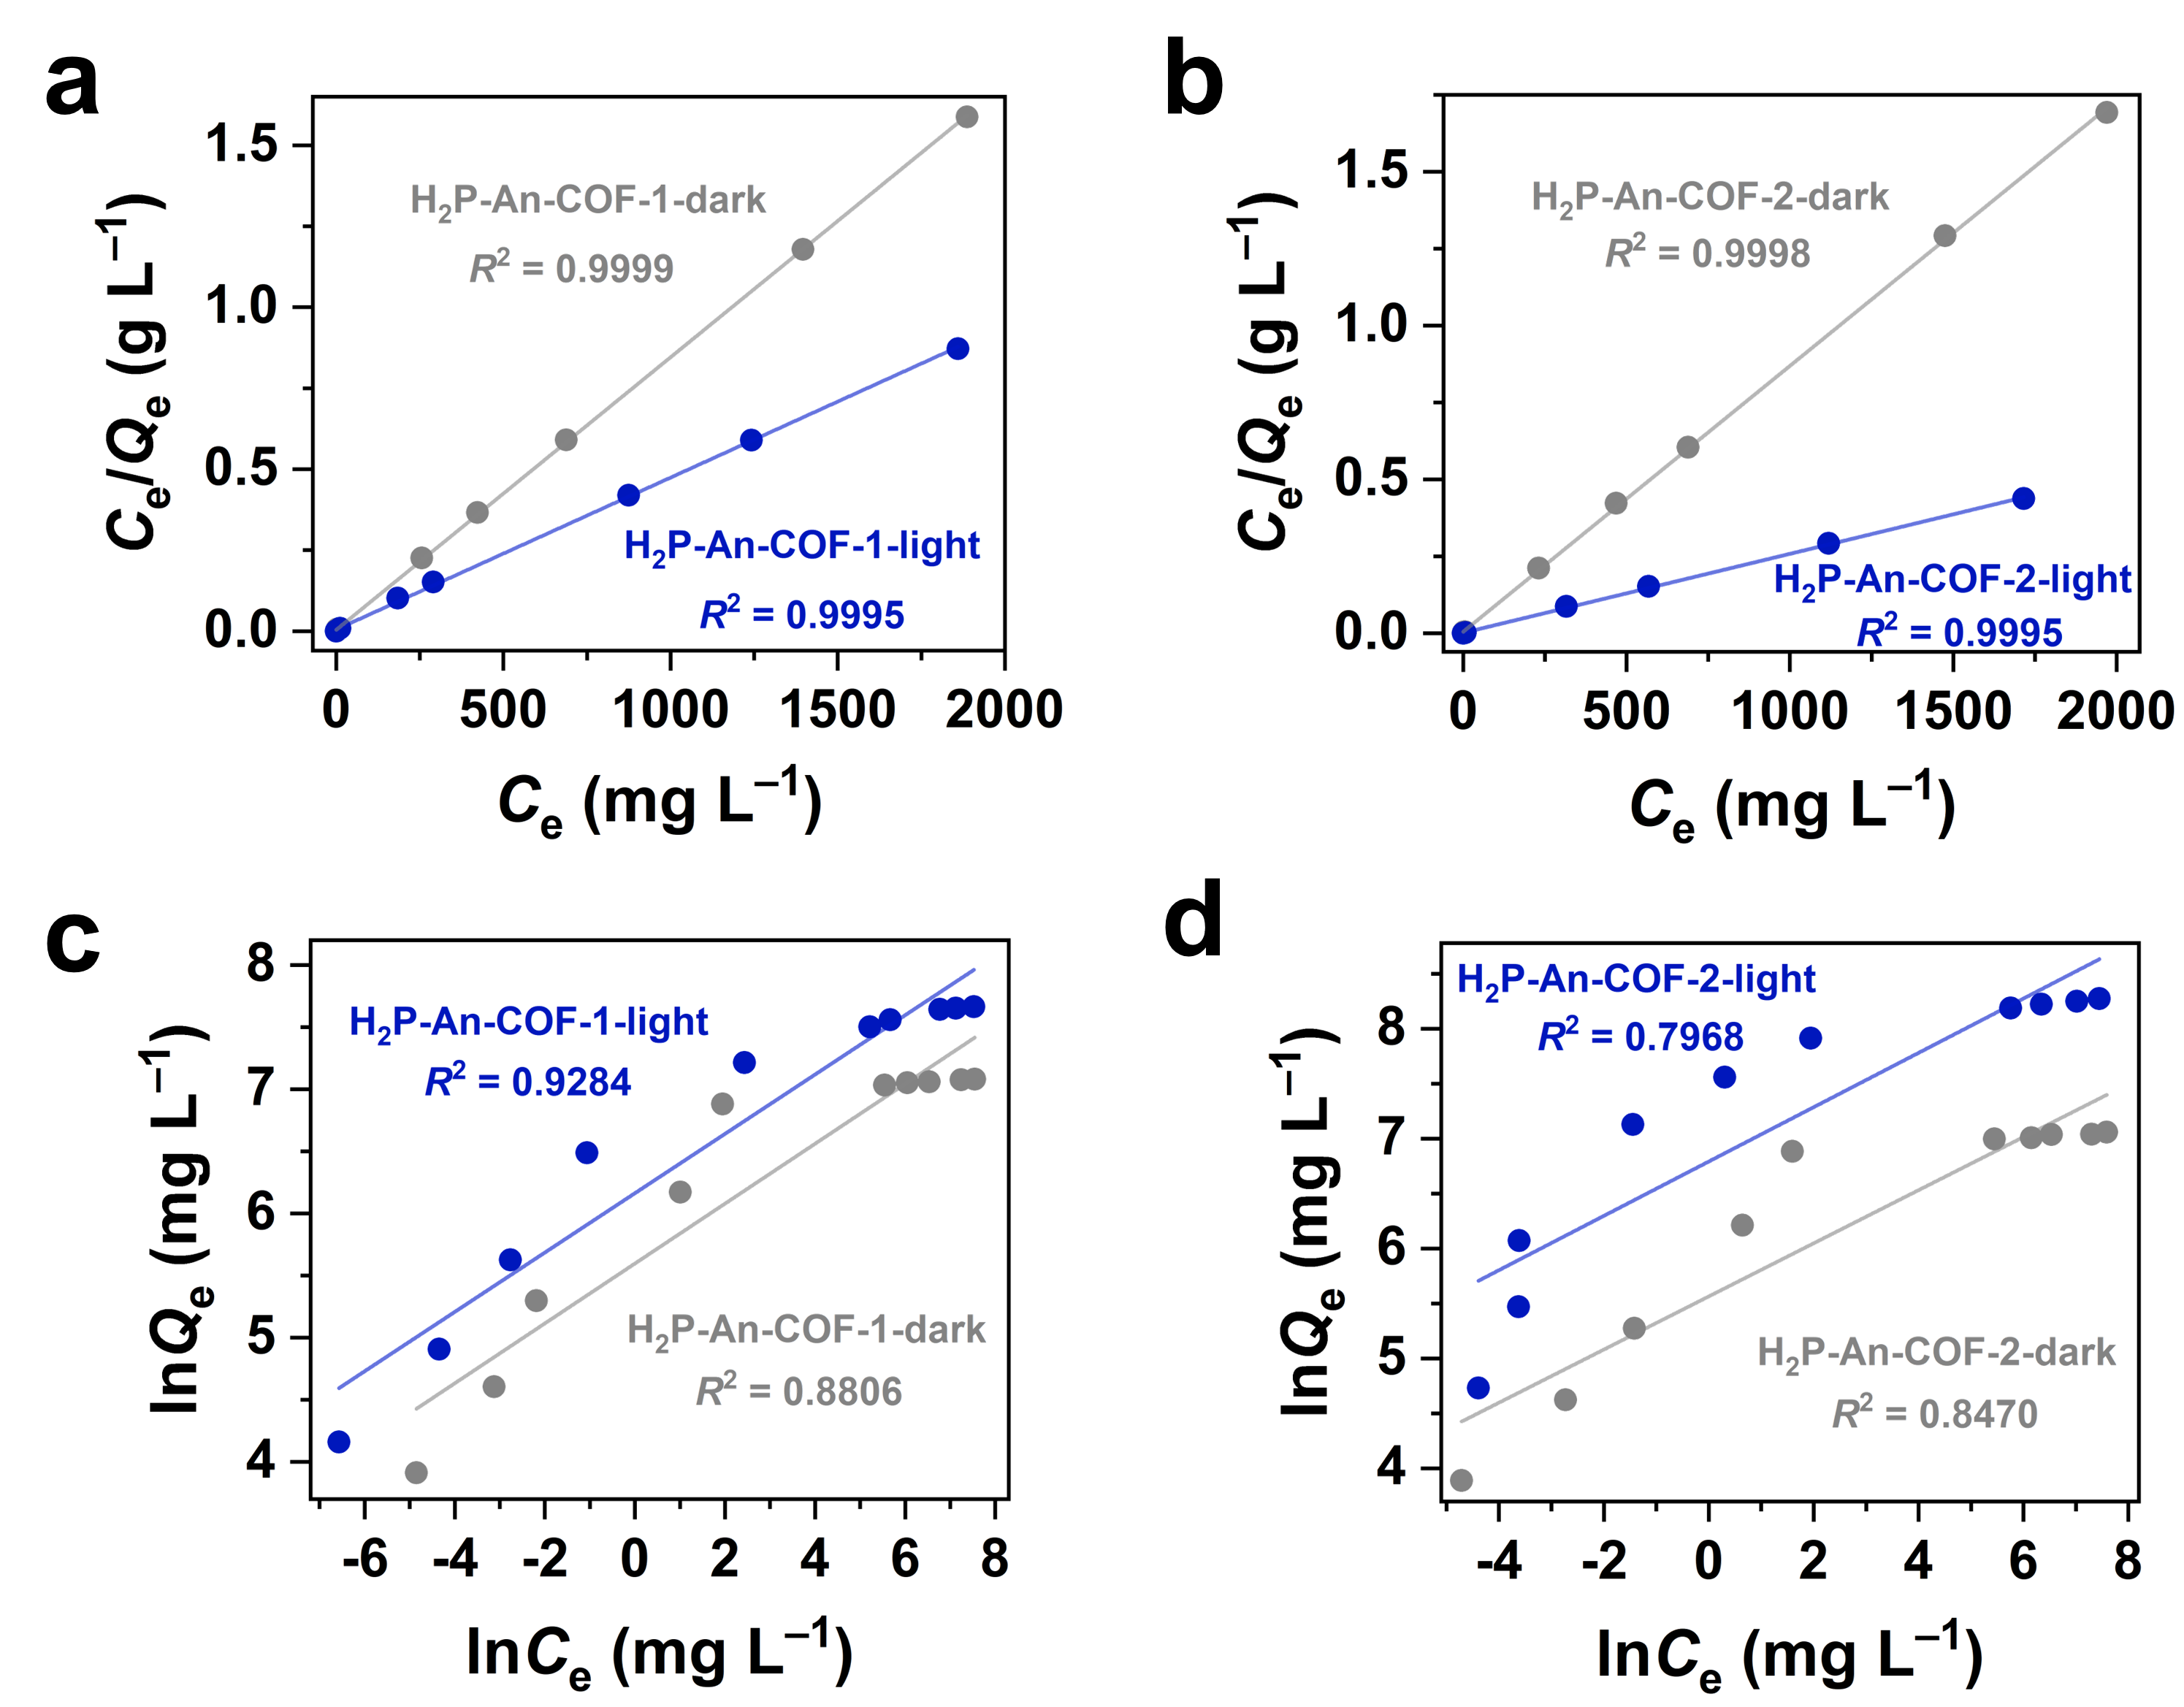


**Supplementary Fig. 35** Langmuir adsorption models of (a) H2P-An-COF-1 and (b) H2P-An-COF-2 under dark and light; Freundlich adsorption models of (c) H2P-An-COF-1 and (d) H2P-An-COF-2 under dark and light.


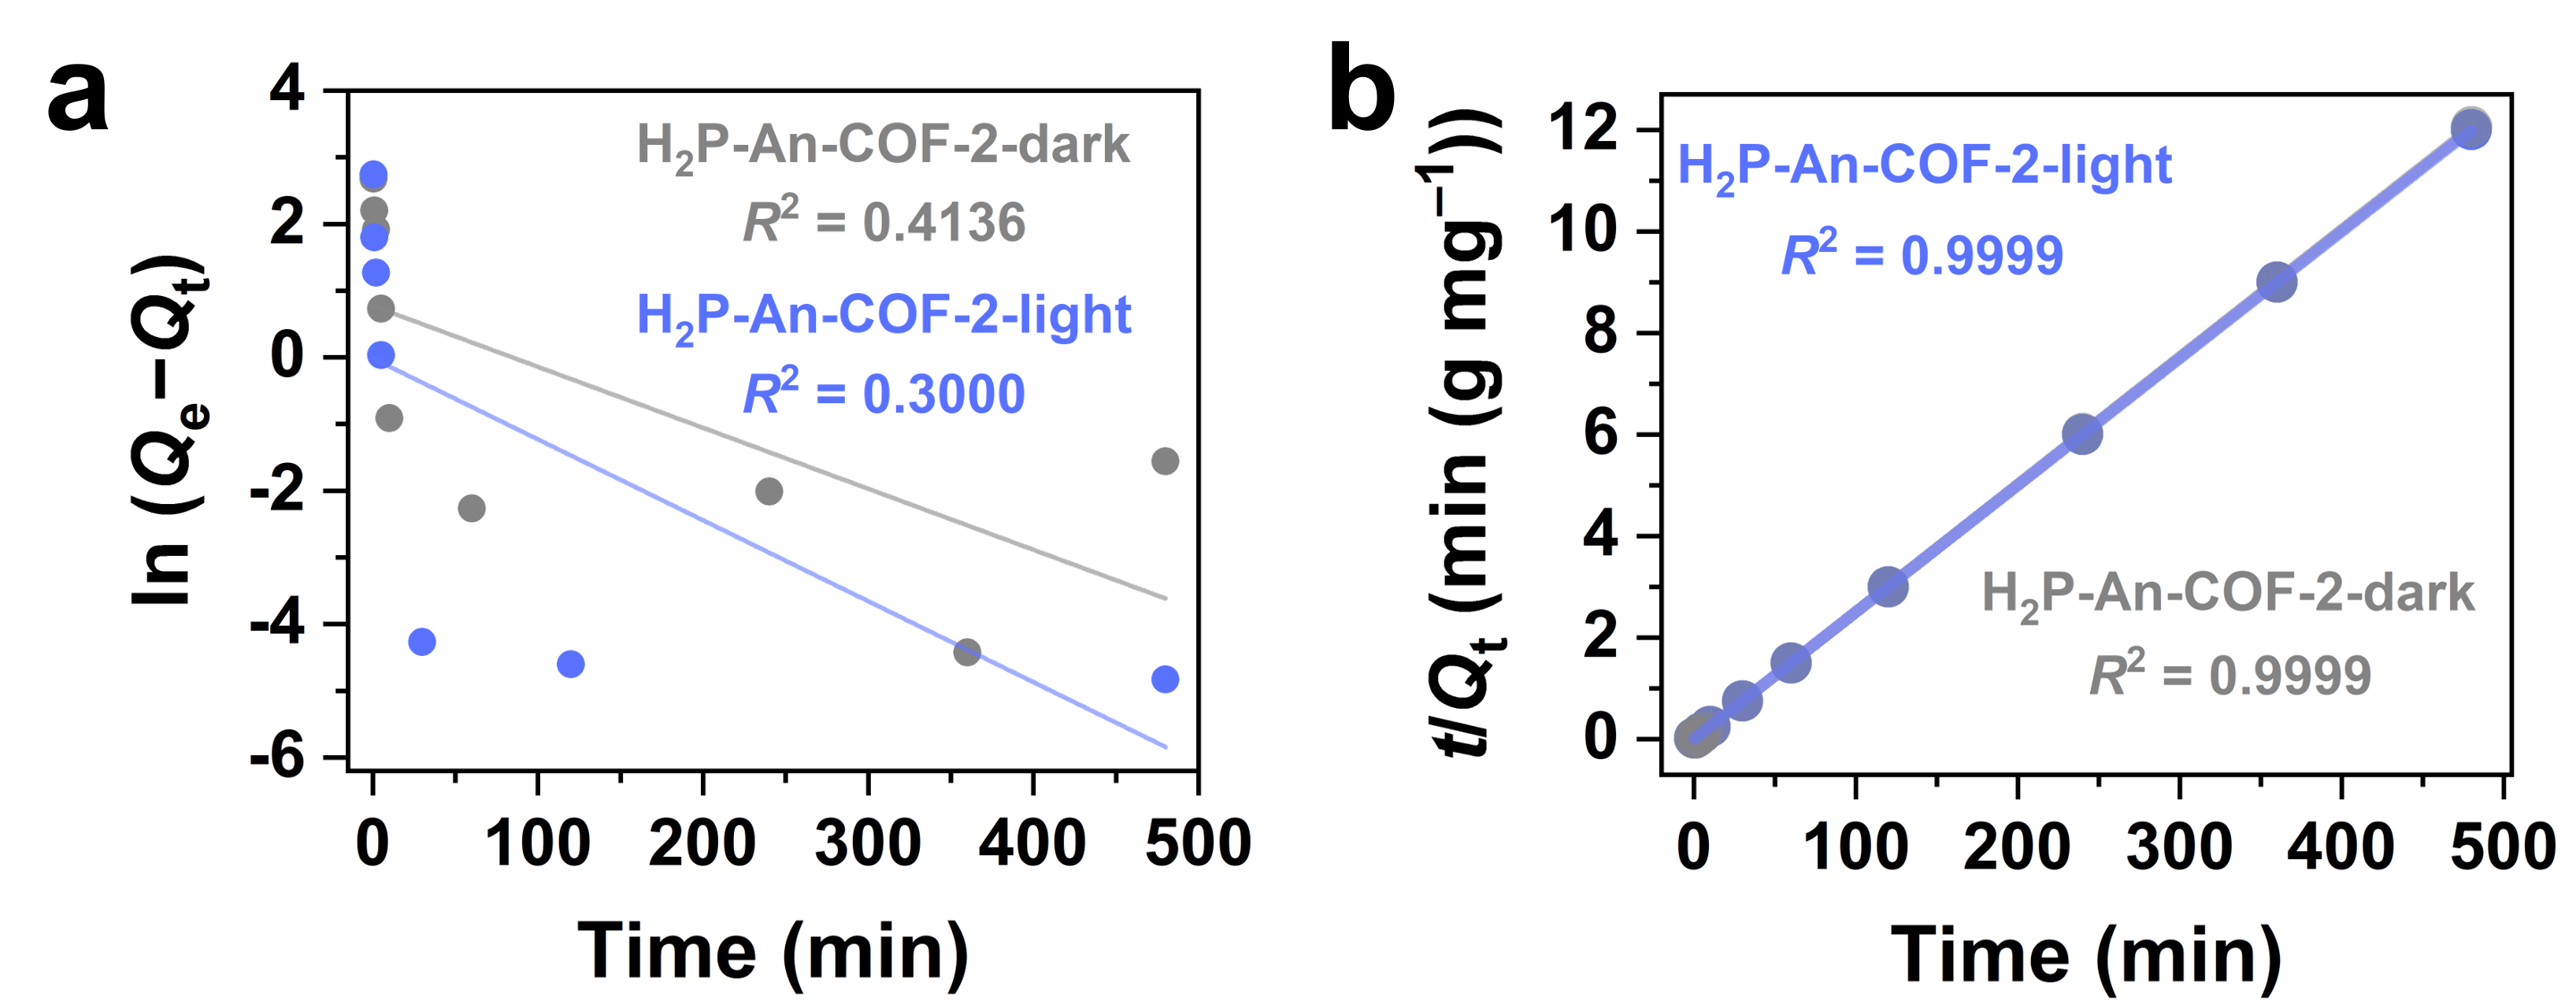


**Supplementary Fig. 36** (a) Pseudo-first-order and (b) pseudo-second-order adsorption kinetic plots of AuCl4− with H2P-An-COF-2 under dark and light conditions.


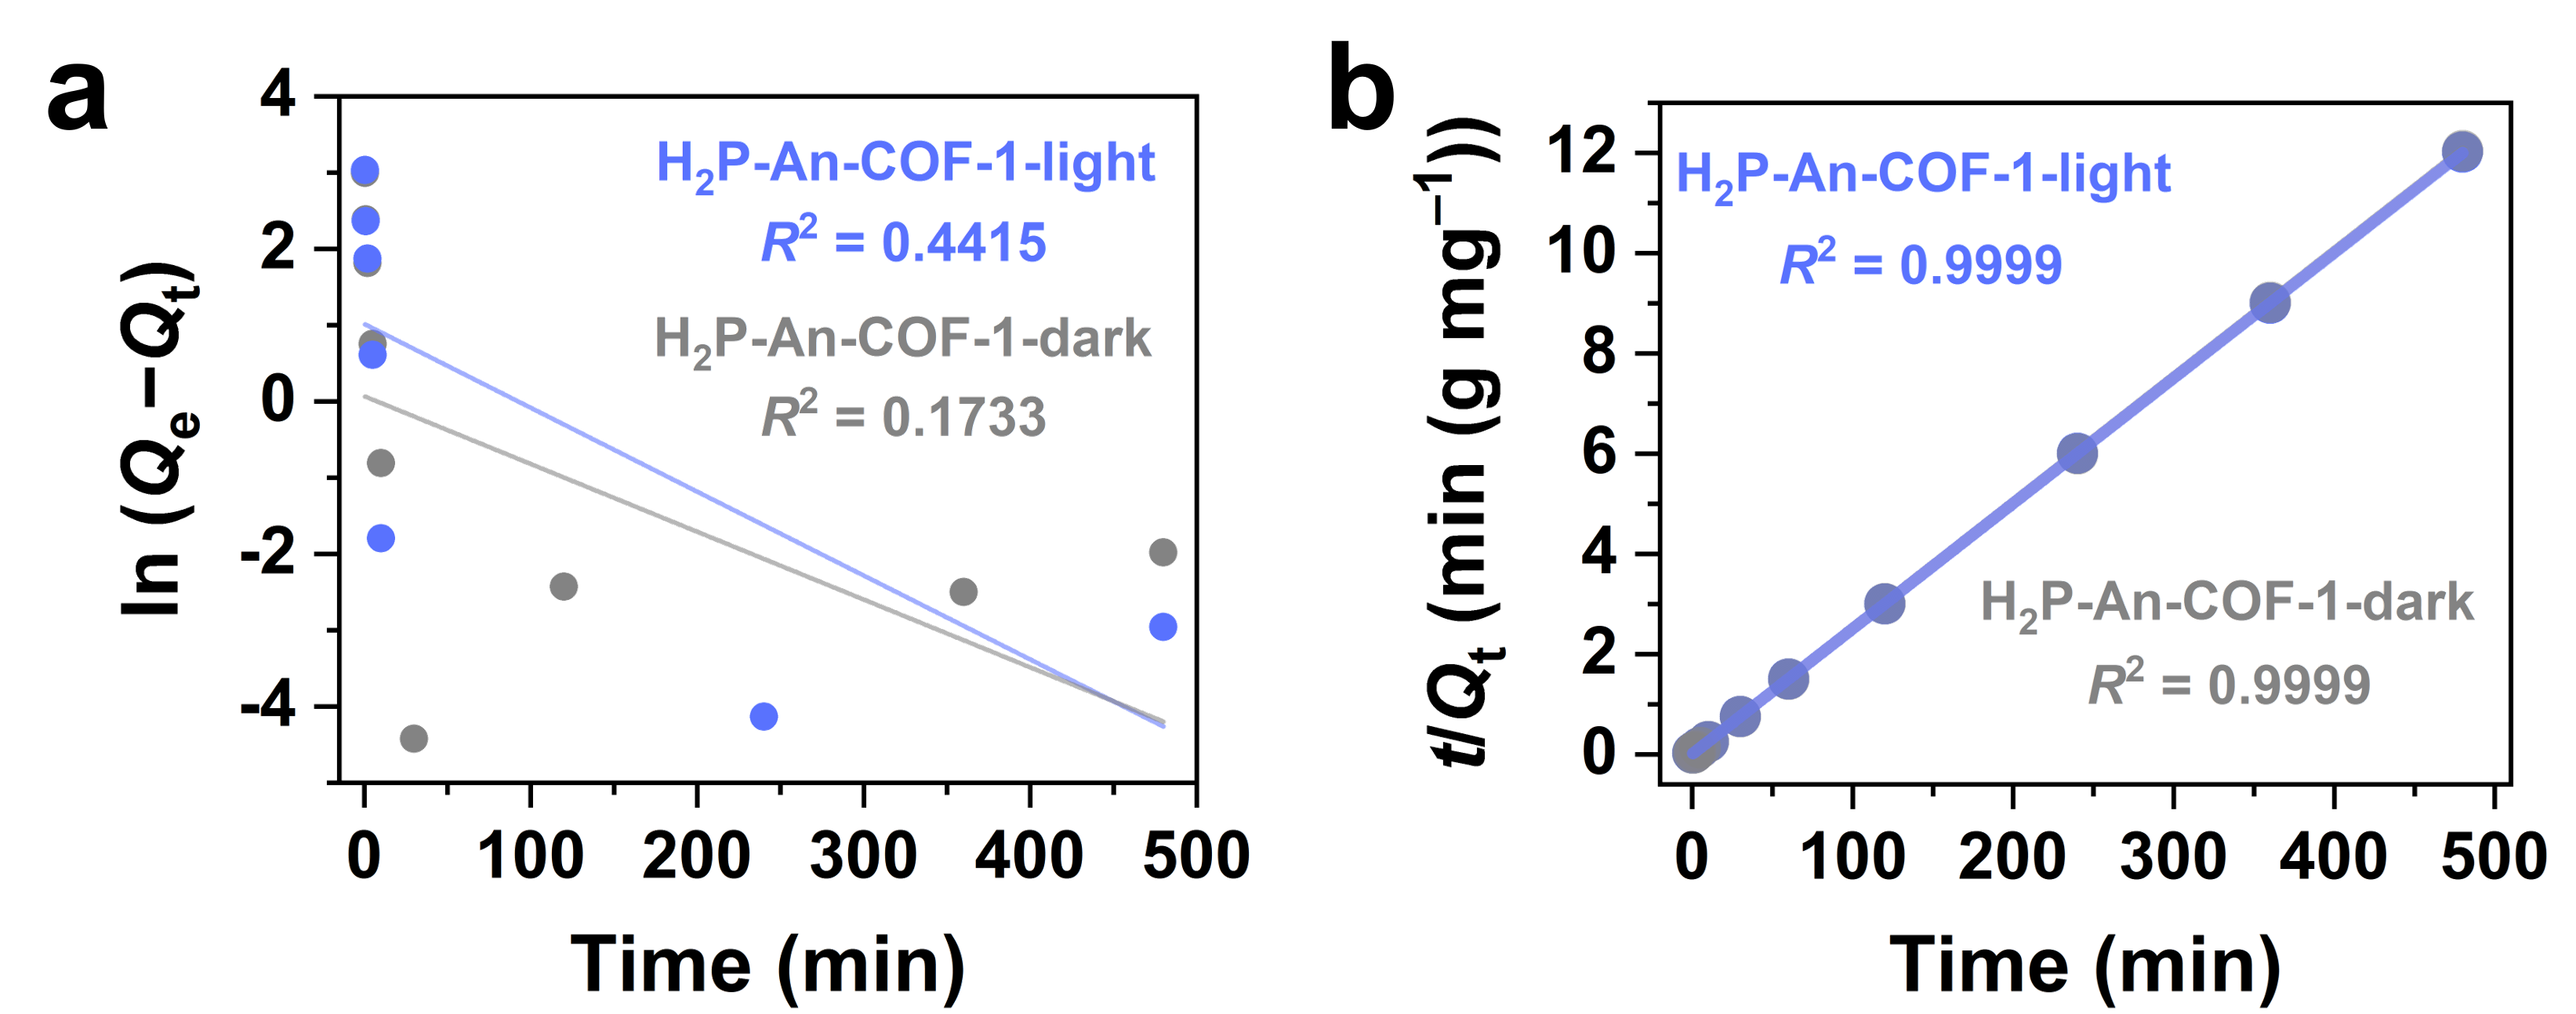


**Supplementary Fig. 37** (a) Pseudo-first-order and (b) pseudo-second-order adsorption kinetic plots of AuCl4− with H2P-An-COF-1 under dark and light conditions.


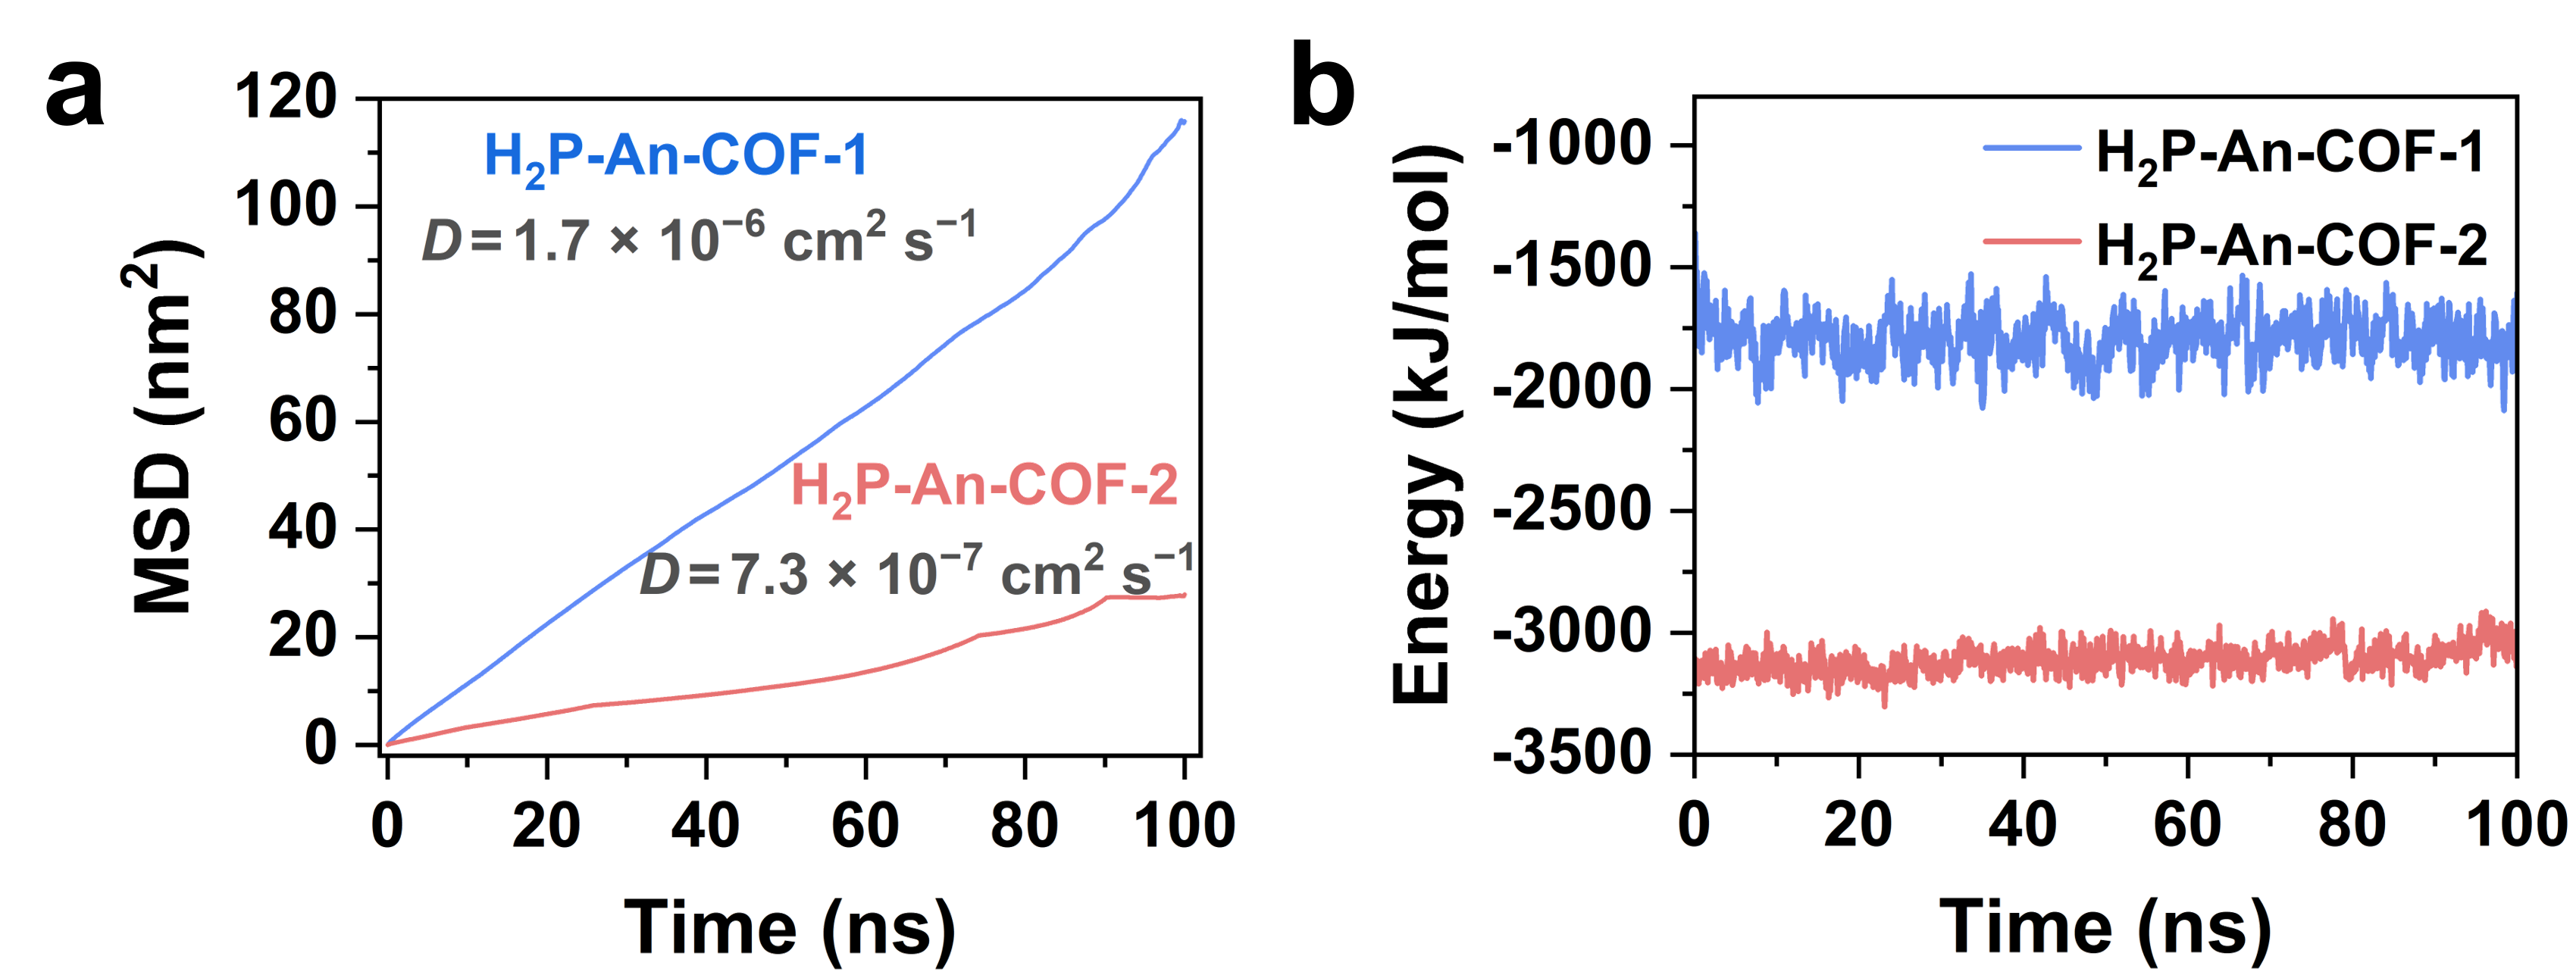


**Supplementary Fig. 38** (a) Calculated MSD of AuCl4− as a function of the simulation time. (b) Interaction energy between AuCl4− and protonated porphyrin nitrogen atoms.





**Supplementary Fig. 39** Zeta potentials of H2P-An-COF-1 (blue curve) and H2P-An-COF-2 (red curve) with different pH values.


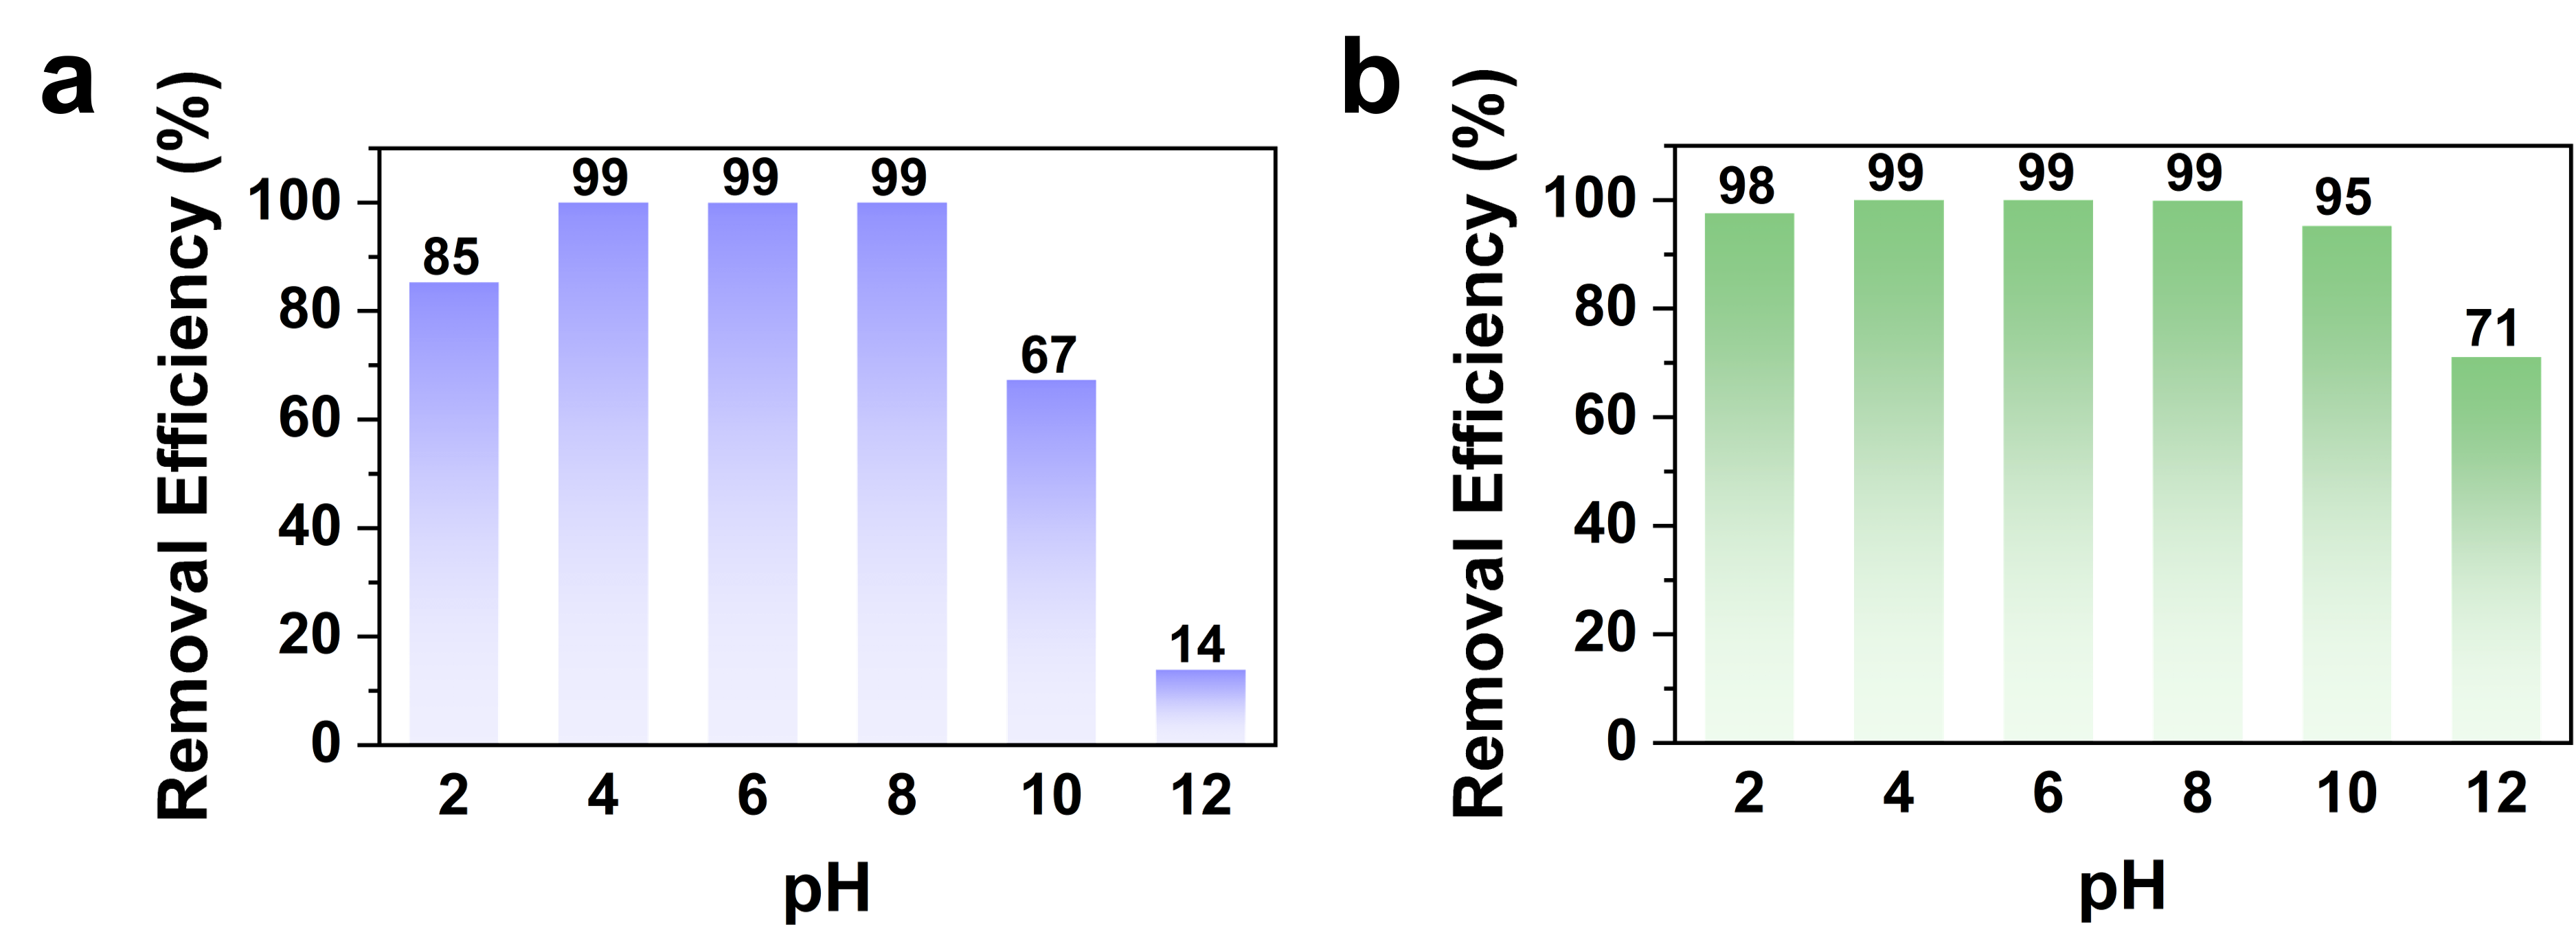


**Supplementary Fig. 40** Comparison of the removal efficiencies of (a) H2P-An-COF-1 and (b) H2P-An-COF-2 under dark.


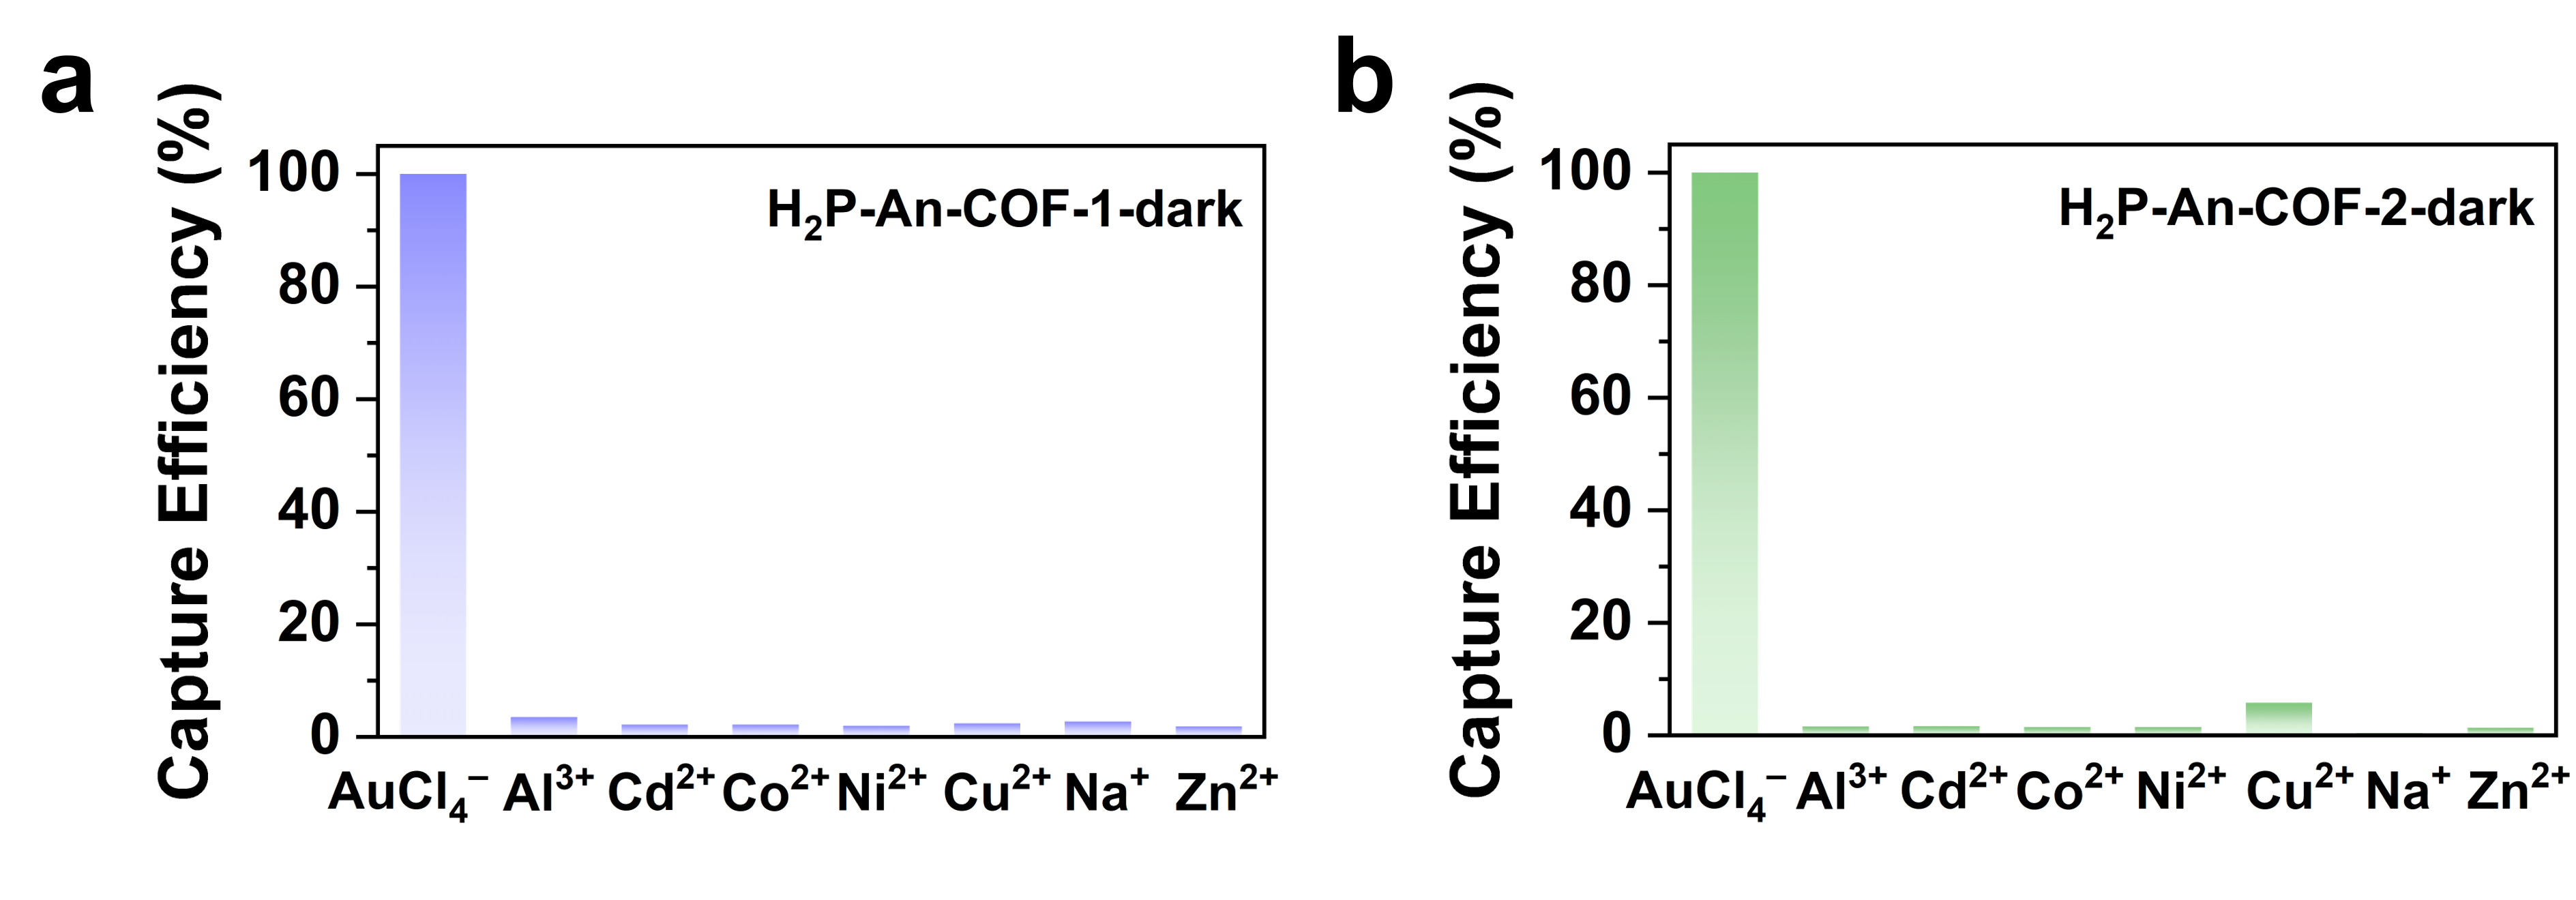


**Supplementary Fig. 41** The adsorption selectivity of (a) H2P-An-COF-1 and (b) H2P-An-COF-2 for different metal ions in electronic waste leachate under dark.


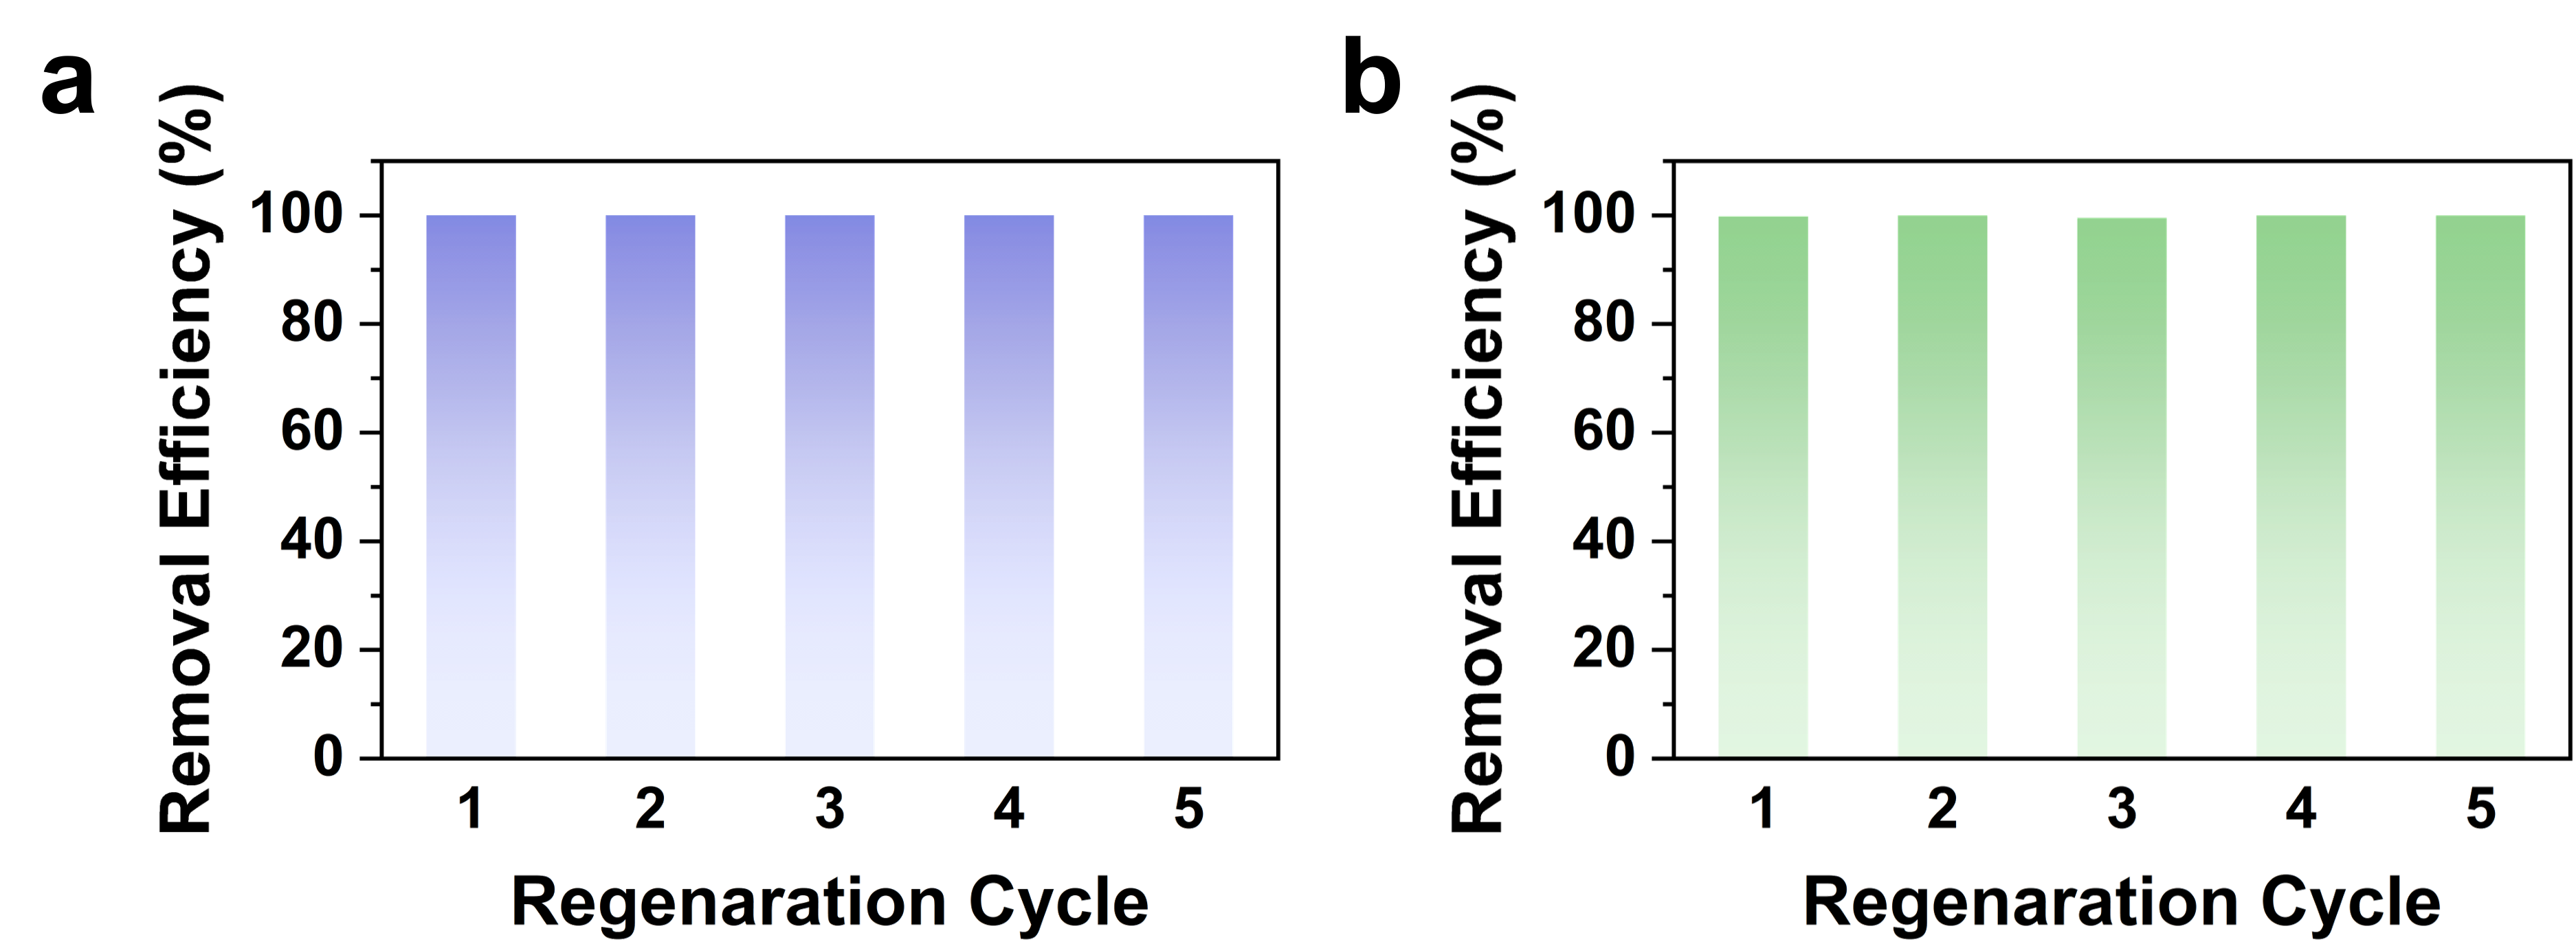


**Supplementary Fig. 42** The cyclic adsorption performance of (a) H2P-An-COF-1 and (b) H2P-An-COF-2 under dark.


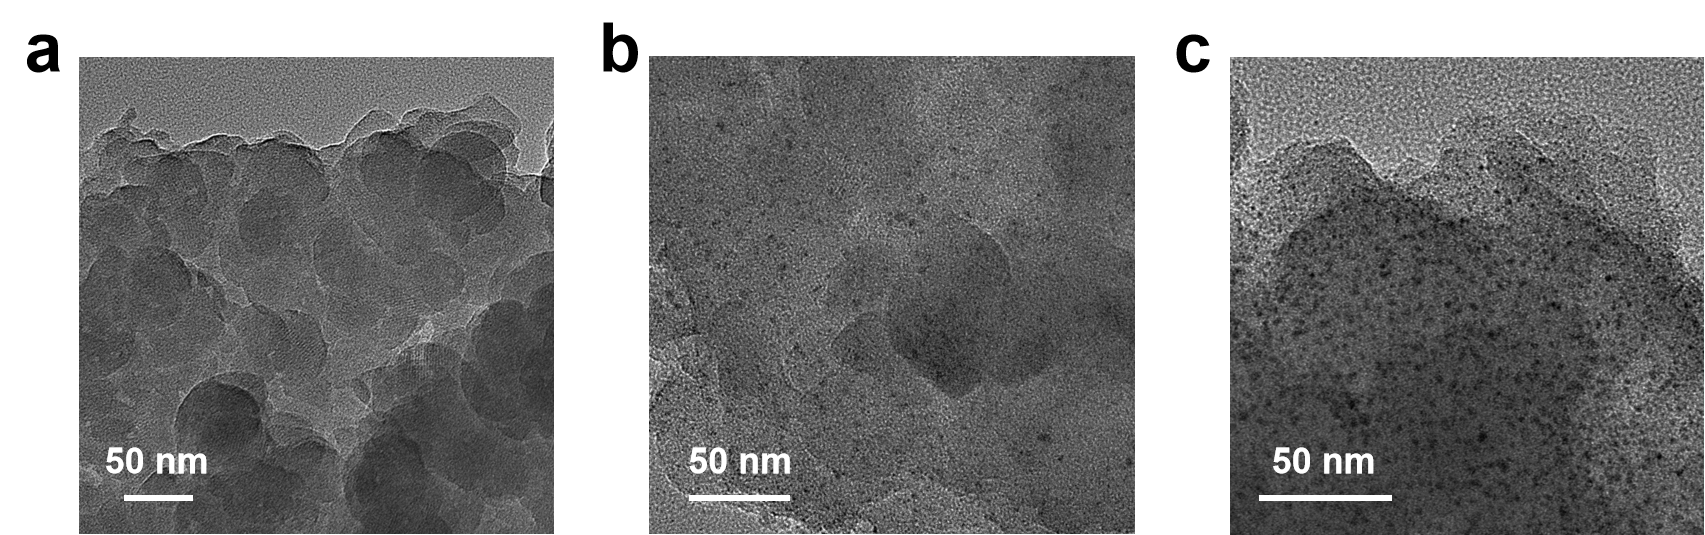


**Supplementary Fig. 43** TEM images of H2P-An-COF-1 (a) before adsorption, (b) after adsorption in the dark, and (c) after adsorption under light.


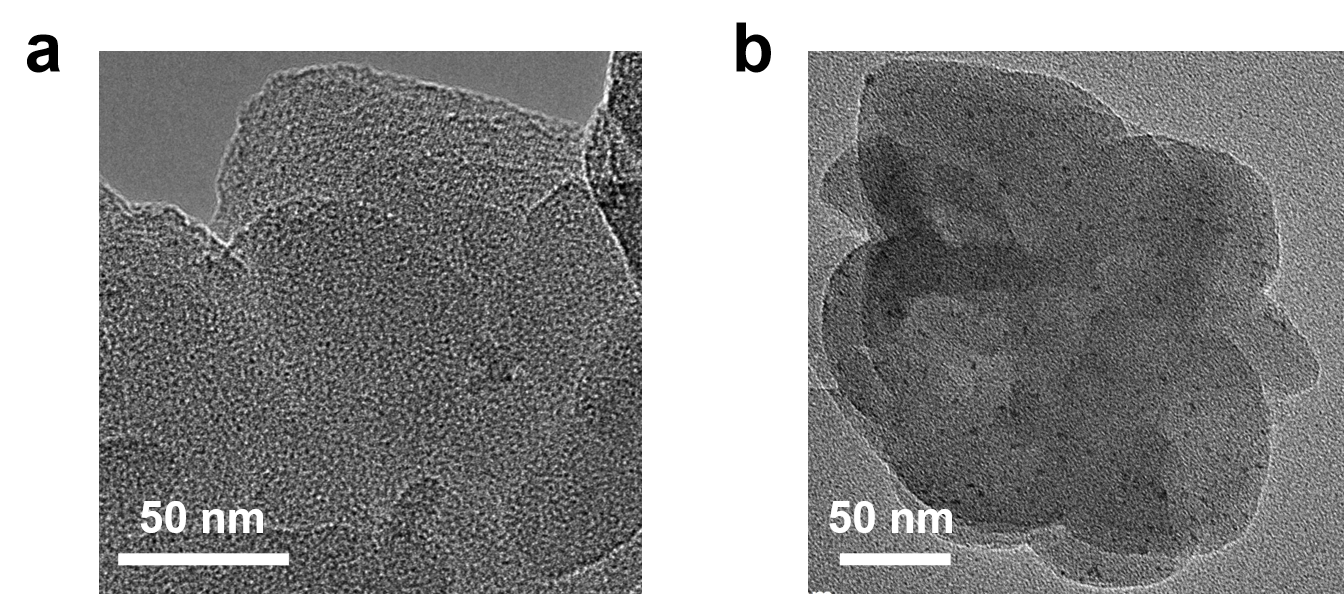


**Supplementary Fig. 44** TEM images of H2P-An-COF-2 (a) before adsorption and (b) after adsorption under dark.


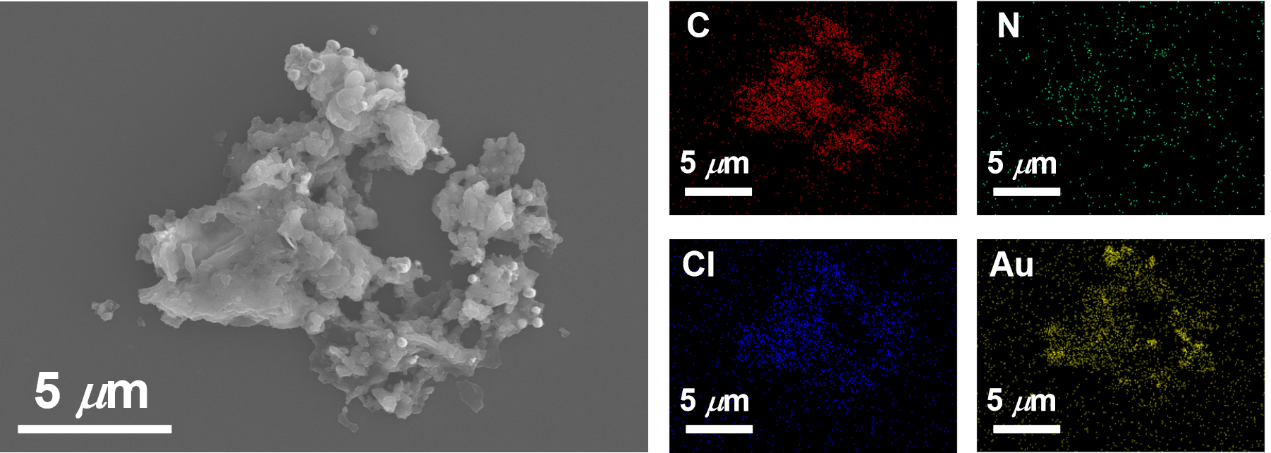


**Supplementary Fig. 45** EDS images of H2P-An-COF-1 after adsorption under dark.


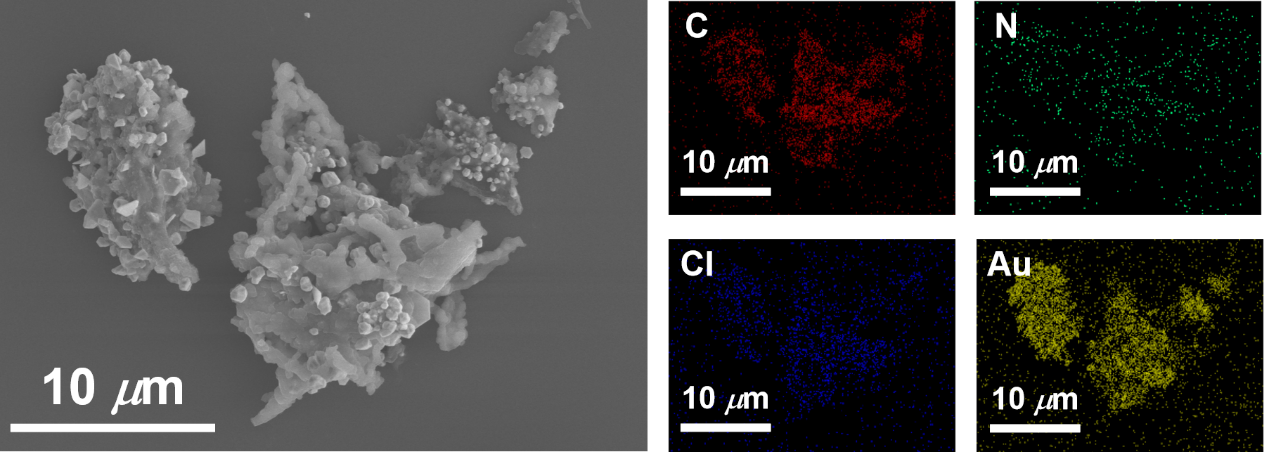


**Supplementary Fig. 46** EDS images of H2P-An-COF-1 after adsorption under light.


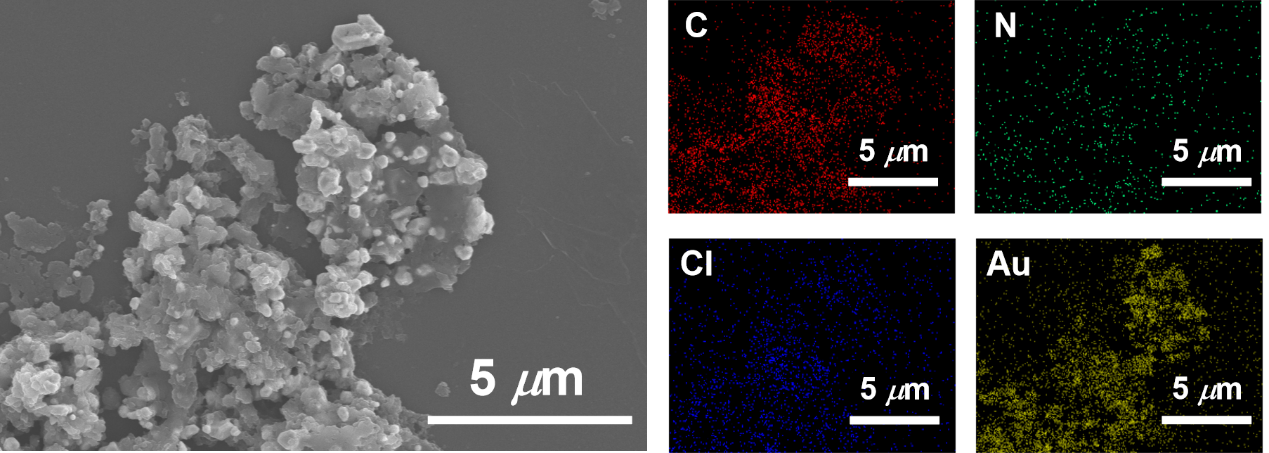


**Supplementary Fig. 47** EDS images of H2P-An-COF-2 after adsorption under dark.





**Supplementary Fig. 48** XPS spectra of H2P-An-COF-1 after adsorption under dark.





**Supplementary Fig. 49** XPS spectra of H2P-An-COF-2 after adsorption under dark.





**Supplementary Fig. 50** XPS spectra of H2P-An-COF-1 after adsorption under light.


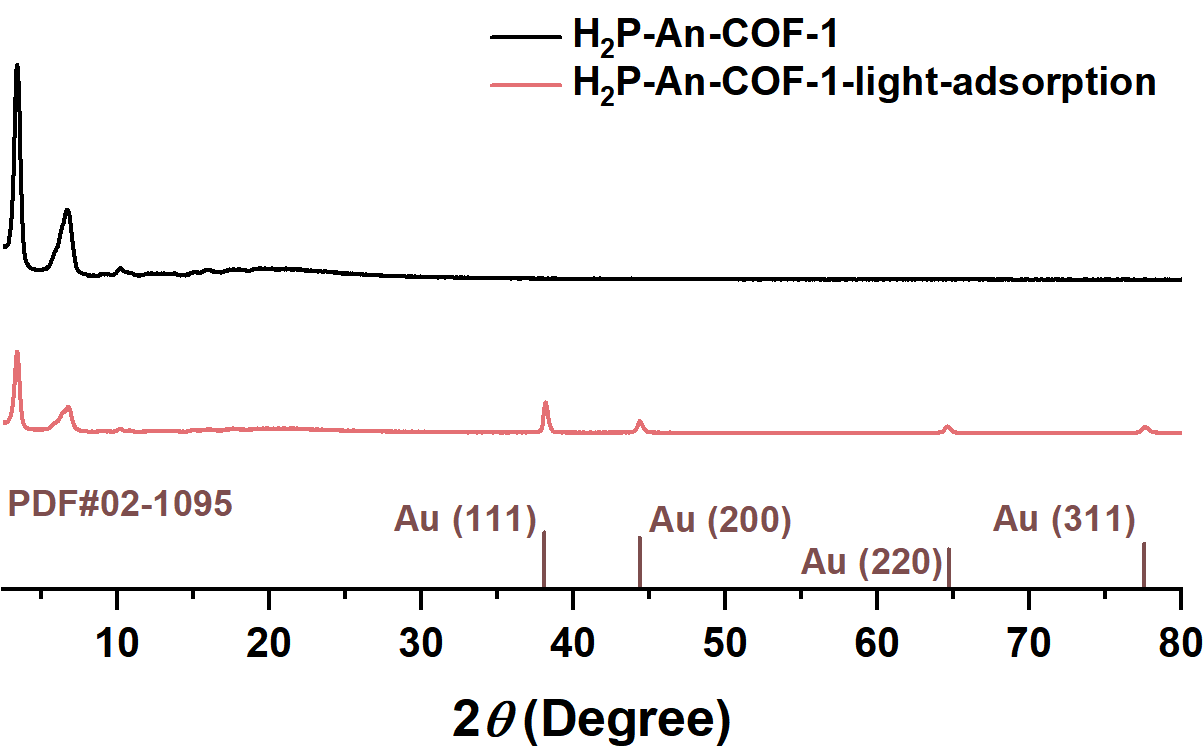


**Supplementary Fig. 51** PXRD patterns of H2P-An-COF-1 before and after gold adsorption under light conditions.





**Supplementary Fig. 52** PXRD patterns of H2P-An-COF-1 before adsorption and after gold desorption under dark and light conditions.





**Supplementary Fig. 53** FT-IR spectra before and after gold adsorption, and after desorption of H2P-An-COF-1.

3. Supplementary Tables

**Supplementary Table 1.** Absorption comparison of H2P-An-COF-1 and H2P-An-COF-2 with other reported materials towards gold.

| COFs | *Q*e (dark)  mg g−1 | *Q*e (light)  mg g−1 | Fold Increase | Selectivity | Reference |
| --- | --- | --- | --- | --- | --- |
| COF-Py-BTP-NS | 2059 | 4374 | 2.1 | >99.9% | 1 |
| COF-Py-BTP | 1893 | 2845 | 1.5 | / | 1 |
| ECUT-COF-29 | 1759 | 3714 | 2.1 | 99% | 2 |
| H2P-An-COF-2 | 1164 | 3920 | 3.4 | >99% | this work |
| H2P-An-COF-1 | 1189 | 2133 | 1.8 | >99% | this work |
| TAPP-TB-COF | 853 | 2766 | 3.2 | ~75% | 3 |
| TAPP-TZ-COF | 1100 | 3548 | 3.2 | ~86% | 3 |
| TAPP-TZ-OMe-COF | 1301 | 4109 | 3.2 | >99% | 3 |
| v-2D-COF-Dz | / | 2465 | / | 99.5% | 4 |
| v-2D-COF-Pz | / | 1854 | / | 98.4% | 4 |
| DABI-COF | 3906.5 | 2142.7 | 1.8 | >90% | 5 |
| Tp-BTD-AA | 1706.5 | 3094.6 | 1.8 | ~100% | 6 |
| Pc–POSS–POPs | 862.07 | 1026.87 | 1.2 | 98.88% | 7 |
| TpPa-1/CS aerogel | 1470 (25℃)  1575 (35℃) | 2152 | ~1.5 | 96% | 8 |

**Supplementary Table 2.** Fractional atomic coordinates for H2P-An-COF-2.

| Space group | *P*2 (No.3) | | |
| --- | --- | --- | --- |
| Calculated unit cell | *a* = 16.9974 Å, *b* = 31.6956 Å, *c* = 17.3573 Å,  *a* = *g* = 90°, *b* = 123° | | |
| Pawley refinement | *R*p = 2.44% and *R*wp = 4.02% | | |
| Atoms | x | y | z |
| C1 | 0.0191 | 0.0342 | 0.1784 |
| C2 | 0.0212 | 0.0213 | 0.2557 |
| C3 | 0.0246 | 0.0755 | 0.1550 |
| C4 | 0.0081 | 0.1250 | 0.0446 |
| C5 | 0.0128 | 0.0847 | 0.0691 |
| C6 | 0.0950 | 0.1457 | 0.2329 |
| C7 | 0.0878 | 0.1844 | 0.2675 |
| C8 | 0.0196 | 0.1903 | 0.2877 |
| C9 | -0.0378 | 0.1560 | 0.2770 |
| C10 | -0.0316 | 0.1174 | 0.2406 |
| C11 | 0.0336 | 0.1120 | 0.2159 |
| C12 | 0.0594 | 0.2635 | 0.3359 |
| N13 | 0.0048 | 0.2307 | 0.3160 |
| C14 | 0.1112 | 0.3341 | 0.4125 |
| C15 | 0.0961 | 0.3704 | 0.4493 |
| C16 | 0.0072 | 0.3784 | 0.4344 |
| C17 | -0.0659 | 0.3492 | 0.3809 |
| C18 | -0.0505 | 0.3127 | 0.3456 |
| C19 | 0.0387 | 0.3043 | 0.3629 |
| C20 | 0.0025 | 0.5226 | 0.5712 |
| C21 | 0.0062 | 0.5432 | 0.6449 |
| C22 | 0.0085 | 0.5216 | 0.7156 |
| C23 | 0.1731 | 0.3671 | 0.0042 |
| C24 | 0.2529 | 0.3545 | 0.0075 |
| C25 | 0.1440 | 0.4082 | -0.0008 |
| C26 | 0.0393 | 0.4586 | -0.0011 |
| C27 | 0.0626 | 0.4180 | -0.0014 |
| C28 | 0.1652 | 0.4674 | -0.0830 |
| C29 | 0.2048 | 0.5066 | -0.0804 |
| C30 | 0.2808 | 0.5225 | 0.0037 |
| C31 | 0.3200 | 0.4976 | 0.0835 |
| C32 | 0.2802 | 0.4585 | 0.0808 |
| C33 | 0.2011 | 0.4435 | -0.0022 |
| C34 | 0.2854 | 0.5903 | -0.0579 |
| N35 | 0.3165 | 0.5645 | 0.0114 |
| C36 | 0.3104 | 0.6555 | -0.1208 |
| C37 | 0.3572 | 0.6938 | -0.1084 |
| C38 | 0.4193 | 0.7103 | -0.0189 |
| C39 | 0.4292 | 0.6887 | 0.0567 |
| C40 | 0.3821 | 0.6506 | 0.0441 |
| C41 | 0.3253 | 0.6330 | -0.0445 |
| C42 | 0.5660 | 0.8527 | -0.0091 |
| C43 | 0.6324 | 0.8731 | -0.0207 |
| C44 | 0.6962 | 0.8515 | -0.0321 |
| C45 | 0.8297 | 0.7015 | 0.8131 |
| C46 | 0.7537 | 0.6887 | 0.7273 |
| C47 | 0.8501 | 0.7424 | 0.8462 |
| C48 | 0.9583 | 0.7919 | 0.9586 |
| C49 | 0.9332 | 0.7516 | 0.9336 |
| C50 | 0.7623 | 0.8099 | 0.8250 |
| C51 | 0.7295 | 0.8492 | 0.7823 |
| C52 | 0.7220 | 0.8581 | 0.6993 |
| C53 | 0.7427 | 0.8260 | 0.6572 |
| C54 | 0.7773 | 0.7868 | 0.7010 |
| C55 | 0.7895 | 0.7787 | 0.7866 |
| C56 | 0.6998 | 0.9330 | 0.7033 |
| N57 | 0.6982 | 0.8996 | 0.6589 |
| C58 | 0.6519 | 1.0074 | 0.7008 |
| C59 | 0.6081 | 0.0450 | 0.6533 |
| C60 | 0.5845 | 0.0521 | 0.5628 |
| C61 | 0.6090 | 0.0213 | 0.5216 |
| C62 | 0.6538 | 0.9816 | 0.5710 |
| C63 | 0.6714 | 0.9749 | 0.6587 |
| C64 | 0.4223 | 0.1928 | 0.4879 |
| C65 | 0.3457 | 0.2133 | 0.4816 |
| C66 | 0.2710 | 0.1912 | 0.4739 |
| C67 | 0.1773 | 0.2983 | 0.0116 |
| C68 | 0.2556 | 0.3110 | 0.0123 |
| C69 | 0.1527 | 0.2572 | 0.0146 |
| C70 | 0.0448 | 0.2068 | 0.0058 |
| C71 | 0.0682 | 0.2474 | 0.0083 |
| C72 | 0.2523 | 0.1927 | 0.0905 |
| C73 | 0.2858 | 0.1536 | 0.0827 |
| C74 | 0.2780 | 0.1426 | 0.0001 |
| C75 | 0.2402 | 0.1720 | -0.0724 |
| C76 | 0.2064 | 0.2110 | -0.0648 |
| C77 | 0.2113 | 0.2216 | 0.0164 |
| C78 | 0.3387 | 0.0718 | 0.0481 |
| N79 | 0.3027 | 0.1014 | -0.0142 |
| C80 | 0.4187 | 0.0018 | 0.0941 |
| C81 | 0.4486 | -0.0326 | 0.0828 |
| C82 | 0.4298 | -0.0502 | 0.0025 |
| C83 | 0.3667 | -0.0235 | -0.0753 |
| C84 | 0.3312 | 0.0159 | -0.0632 |
| C85 | 0.3601 | 0.0299 | 0.0275 |
| C86 | 0.5663 | 0.8074 | -0.0085 |
| C87 | 0.6315 | 0.7864 | -0.0210 |
| C88 | 0.6958 | 0.8078 | -0.0323 |
| C89 | 0.0025 | -0.0347 | 0.1696 |
| C90 | 0.0104 | -0.0221 | 0.2500 |
| C91 | -0.0084 | -0.0758 | 0.1376 |
| C92 | -0.0040 | -0.1253 | 0.0367 |
| C93 | -0.0062 | -0.0850 | 0.0588 |
| C94 | -0.0855 | -0.1426 | 0.1444 |
| C95 | -0.0802 | -0.1813 | 0.1862 |
| C96 | -0.0026 | -0.1903 | 0.2762 |
| C97 | 0.0664 | -0.1590 | 0.3248 |
| C98 | 0.0615 | -0.1204 | 0.2826 |
| C99 | -0.0137 | -0.1120 | 0.1910 |
| C100 | -0.0490 | -0.2624 | 0.2794 |
| N101 | 0.0105 | -0.2313 | 0.3180 |
| C102 | -0.1086 | -0.3304 | 0.2998 |
| C103 | -0.0971 | -0.3672 | 0.3502 |
| C104 | -0.0074 | -0.3788 | 0.4265 |
| C105 | 0.0705 | -0.3531 | 0.4494 |
| C106 | 0.0586 | -0.3162 | 0.3994 |
| C107 | -0.0318 | -0.3039 | 0.3258 |
| C108 | 0.0014 | 0.4770 | 0.5706 |
| C109 | 0.0031 | 0.4563 | 0.6432 |
| C110 | 0.0060 | 0.4779 | 0.7143 |
| C111 | 0.8385 | 0.6327 | 0.8079 |
| C112 | 0.7593 | 0.6452 | 0.7240 |
| C113 | 0.8660 | 0.5915 | 0.8364 |
| C114 | 0.9640 | 0.5415 | 0.9545 |
| C115 | 0.9422 | 0.5820 | 0.9278 |
| C116 | 0.8280 | 0.5388 | 0.7107 |
| C117 | 0.7919 | 0.4991 | 0.6699 |
| C118 | 0.7377 | 0.4758 | 0.6932 |
| C119 | 0.7154 | 0.4939 | 0.7522 |
| C120 | 0.7509 | 0.5333 | 0.7924 |
| C121 | 0.8089 | 0.5558 | 0.7737 |
| C122 | 0.7149 | 0.4122 | 0.6030 |
| N123 | 0.7073 | 0.4332 | 0.6630 |
| C124 | 0.6324 | 0.3539 | 0.4893 |
| C125 | 0.5831 | 0.3155 | 0.4646 |
| C126 | 0.5831 | 0.2903 | 0.5314 |
| C127 | 0.6362 | 0.3037 | 0.6242 |
| C128 | 0.6843 | 0.3423 | 0.6487 |
| C129 | 0.6801 | 0.3683 | 0.5809 |
| C130 | 0.4217 | 0.1475 | 0.4860 |
| C131 | 0.3451 | 0.1261 | 0.4784 |
| C132 | 0.2705 | 0.1475 | 0.4720 |
| N133 | -0.0079 | -0.0002 | 0.8784 |
| N134 | 0.8775 | 0.3327 | -0.0068 |
| N135 | 0.1140 | 0.6672 | 0.1333 |
| H136 | 0.0305 | 0.0455 | 0.3088 |
| H137 | 0.0169 | 0.1512 | 0.0938 |
| H138 | 0.1517 | 0.1409 | 0.2178 |
| H139 | 0.1378 | 0.2113 | 0.2793 |
| H140 | -0.0904 | 0.1592 | 0.2977 |
| H141 | -0.0800 | 0.0901 | 0.2309 |
| H142 | 0.1239 | 0.2603 | 0.3321 |
| H143 | 0.1826 | 0.3286 | 0.4228 |
| H144 | 0.1562 | 0.3938 | 0.4917 |
| H145 | -0.1394 | 0.3551 | 0.3656 |
| H146 | -0.1108 | 0.2896 | 0.3025 |
| H147 | 0.0075 | 0.5791 | 0.6482 |
| H148 | 0.0123 | 0.5397 | 0.7744 |
| H149 | 0.3009 | 0.3791 | 0.0059 |
| H150 | 0.0840 | 0.4850 | -0.0026 |
| H151 | 0.1028 | 0.4547 | -0.1513 |
| H152 | 0.1753 | 0.5255 | -0.1469 |
| H153 | 0.3850 | 0.5091 | 0.1515 |
| H154 | 0.3122 | 0.4386 | 0.1464 |
| H155 | 0.2262 | 0.5795 | -0.1300 |
| H156 | 0.2596 | 0.6424 | -0.1935 |
| H157 | 0.3451 | 0.7118 | -0.1711 |
| H158 | 0.4761 | 0.7023 | 0.1296 |
| H159 | 0.3898 | 0.6338 | 0.1061 |
| H160 | 0.6352 | 0.9091 | -0.0211 |
| H161 | 0.7484 | 0.8697 | -0.0413 |
| H162 | 0.7018 | 0.7130 | 0.6758 |
| H163 | 0.9108 | 0.8184 | 0.9114 |
| H164 | 0.7672 | 0.8028 | 0.8920 |
| H165 | 0.7088 | 0.8743 | 0.8150 |
| H166 | 0.7315 | 0.8316 | 0.5868 |
| H167 | 0.7957 | 0.7613 | 0.6670 |
| H168 | 0.7242 | 0.9293 | 0.7788 |
| H169 | 0.6717 | 1.0035 | 0.7748 |
| H170 | 0.5918 | 0.0700 | 0.6897 |
| H171 | 0.5942 | 0.0269 | 0.4498 |
| H172 | 0.6741 | 0.9564 | 0.5380 |
| H173 | 0.3433 | 0.2492 | 0.4828 |
| H174 | 0.2102 | 0.2091 | 0.4691 |
| H175 | 0.3156 | 0.2931 | 0.0158 |
| H176 | 0.0946 | 0.1809 | 0.0124 |
| H177 | 0.2582 | 0.2014 | 0.1573 |
| H178 | 0.3194 | 0.1306 | 0.1434 |
| H179 | 0.2367 | 0.1643 | -0.1385 |
| H180 | 0.1747 | 0.2344 | -0.1247 |
| H181 | 0.3538 | 0.0787 | 0.1197 |
| H182 | 0.3435 | -0.0333 | -0.1482 |
| H183 | 0.2801 | 0.0357 | -0.1265 |
| H184 | 0.6329 | 0.7505 | -0.0222 |
| H185 | 0.7479 | 0.7897 | -0.0415 |
| H186 | 0.0073 | -0.0466 | 0.2966 |
| H187 | -0.0085 | -0.1519 | 0.0784 |
| H188 | -0.1486 | -0.1354 | 0.0715 |
| H189 | -0.1390 | -0.2056 | 0.1472 |
| H190 | 0.1273 | -0.1647 | 0.3995 |
| H191 | 0.1187 | -0.0956 | 0.3226 |
| H192 | -0.1160 | -0.2570 | 0.2079 |
| H193 | -0.1812 | -0.3217 | 0.2369 |
| H194 | -0.1607 | -0.3879 | 0.3293 |
| H195 | 0.1445 | -0.3622 | 0.5094 |
| H196 | 0.1225 | -0.2960 | 0.4186 |
| H197 | 0.0021 | 0.4204 | 0.6452 |
| H198 | 0.0064 | 0.4599 | 0.7714 |
| H199 | 0.7038 | 0.6273 | 0.6593 |
| H200 | 0.9234 | 0.5150 | 0.9028 |
| H201 | 0.8731 | 0.5575 | 0.6927 |
| H202 | 0.8067 | 0.4858 | 0.6181 |
| H203 | 0.6675 | 0.4764 | 0.7682 |
| H204 | 0.7326 | 0.5473 | 0.8411 |
| H205 | 0.7478 | 0.4273 | 0.5675 |
| H206 | 0.6335 | 0.3735 | 0.4348 |
| H207 | 0.5425 | 0.3043 | 0.3896 |
| H208 | 0.6405 | 0.2830 | 0.6802 |
| H209 | 0.7273 | 0.3528 | 0.7242 |
| H210 | 0.3433 | 0.0902 | 0.4775 |
| H211 | 0.2090 | 0.1294 | 0.4651 |
| H212 | -0.0056 | 0.0052 | 0.9428 |
| H213 | 0.9431 | 0.3382 | -0.0047 |
| H214 | 0.0500 | 0.6726 | 0.0629 |
| H215 | 0.4463 | 0.0083 | 0.1697 |
| H216 | 0.4972 | -0.0495 | 0.1516 |
| C217 | 0.0000 | 0.4063 | 0.5000 |
| C218 | 0.0000 | 0.4529 | 0.5000 |
| C219 | 0.0000 | -0.4068 | 0.5000 |
| C220 | 0.0000 | 0.5467 | 0.5000 |
| C221 | 0.5000 | 0.7377 | 0.0000 |
| C222 | 0.5000 | 0.7836 | 0.0000 |
| C223 | 0.5000 | -0.0771 | 0.0000 |
| C224 | 0.5000 | 0.8767 | 0.0000 |
| C225 | 0.5000 | 0.0787 | 0.5000 |
| C226 | 0.5000 | 0.1242 | 0.5000 |
| C227 | 0.5000 | 0.2626 | 0.5000 |
| C228 | 0.5000 | 0.2166 | 0.5000 |
| N229 | 0.0000 | -0.0586 | 0.0000 |
| N230 | 0.0000 | 0.2736 | 0.0000 |
| N231 | 0.0000 | 0.6084 | 0.0000 |
| N232 | 0.0000 | 0.3916 | 0.0000 |
| N233 | 0.0000 | 0.0585 | 0.0000 |
| N234 | 0.0000 | 0.7251 | 0.0000 |

4. Supplementary References

1. Chen, Y. et al. Irreversible sulfur cyclization to construct a D–A type covalent organic framework with ultrastability for photoenhanced gold recovery. *Nano Lett.* **25**, 14115–14123 (2025).

2. Huang, Z. et al. Efficient gold recovery by a thiazolyl covalent organic framework. *Chem. Commun.* **60**, 4950 (2024).

3. Zhang, J. et al. Electronic structure tailored covalent organic frameworks for synergistic adsorptive-photocatalytic gold recovery from complex electronic waste. *Research* **8**, 1012 (2025).

4. Yang, Q. et al. Isomeric conjugated covalent organic frameworks with tunable nitrogen topologies for integrated gold adsorption and photoreduction. *Angew. Chem. Int. Ed.* **64**, e202516067 (2025).

5. Chen, S.-M. et al. A one-dimensional covalent organic framework for dual-mode sensing and photocatalytic recovery of gold ions from electronic waste. *Sens. Actuators B* **455**, 139649 (2026).

6. Yang, S. et al. Covalent organic framework isomers for photoenhanced gold recovery from e-waste with high efficiency and selectivity. *ACS Sustainable Chem. Eng.* **10**, 9719–9731 (2022).

7. Ding, R. et al. Highly efficient and selective gold recovery based on hypercross linking and polyamine-functionalized porous organic polymers. *ACS Appl. Mater. Interfaces* **14**, 11803–11812 (2022).

8. Guo, W. et al. Self-floating COF/chitosan aerogel for light-induced enhanced gold recovery. *Chem. Eng. J.* **525**, 169554 (2025).
